# Supplementary material for: Opioid versus opioid-free analgesia after surgical discharge: protocol for a systematic review and meta-analysis
Source: PubMed Central journal article supplement — BMJ Open. 2020 Feb 2;10(1):e035443. doi: 10.1136/bmjopen-2019-035443 (PMC7045253; doi:10.1136/bmjopen-2019-035443), 2020-02-02
Supplement: bmjopen-2019-035443.draft_revisions.pdf [file bmjopen-2019-035443.draft_revisions.pdf]

# BMJ Open

BMJ Open is committed to open peer review. As part of this commitment we make the peer review history of every article we publish publicly available.

When an article is published we post the peer reviewers' comments and the authors' responses online. We also post the versions of the paper that were used during peer review. These are the versions that the peer review comments apply to.

The versions of the paper that follow are the versions that were submitted during the peer review process. They are not the versions of record or the final published versions. They should not be cited or distributed as the published version of this manuscript.

BMJ Open is an open access journal and the full, final, typeset and author-corrected version of record of the manuscript is available on our site with no access controls, subscription charges or pay-per-view fees (<http://bmjopen.bmj.com>).

If you have any questions on BMJ Open's open peer review process please email [info.bmjopen@bmj.com](mailto:info.bmjopen@bmj.com)

# BMJ Open

## Opioid versus opioid-free analgesia after surgical discharge: protocol for a systematic review and meta-analysis

|                               |                                                                                                                                                                                                                                                                                                                                                                                                                                                                                                                                                                                                                                                                                                                                                                                                                                                                                                                                                                                                                                                                                                                                                                                                                                                                                                                                                                                                                                                                                                                                                                                                                                                                                                                                                                                                                                                                                                                                                                          |
|-------------------------------|--------------------------------------------------------------------------------------------------------------------------------------------------------------------------------------------------------------------------------------------------------------------------------------------------------------------------------------------------------------------------------------------------------------------------------------------------------------------------------------------------------------------------------------------------------------------------------------------------------------------------------------------------------------------------------------------------------------------------------------------------------------------------------------------------------------------------------------------------------------------------------------------------------------------------------------------------------------------------------------------------------------------------------------------------------------------------------------------------------------------------------------------------------------------------------------------------------------------------------------------------------------------------------------------------------------------------------------------------------------------------------------------------------------------------------------------------------------------------------------------------------------------------------------------------------------------------------------------------------------------------------------------------------------------------------------------------------------------------------------------------------------------------------------------------------------------------------------------------------------------------------------------------------------------------------------------------------------------------|
| Journal:                      | <i>BMJ Open</i>                                                                                                                                                                                                                                                                                                                                                                                                                                                                                                                                                                                                                                                                                                                                                                                                                                                                                                                                                                                                                                                                                                                                                                                                                                                                                                                                                                                                                                                                                                                                                                                                                                                                                                                                                                                                                                                                                                                                                          |
| Manuscript ID                 | bmjopen-2019-035443                                                                                                                                                                                                                                                                                                                                                                                                                                                                                                                                                                                                                                                                                                                                                                                                                                                                                                                                                                                                                                                                                                                                                                                                                                                                                                                                                                                                                                                                                                                                                                                                                                                                                                                                                                                                                                                                                                                                                      |
| Article Type:                 | Protocol                                                                                                                                                                                                                                                                                                                                                                                                                                                                                                                                                                                                                                                                                                                                                                                                                                                                                                                                                                                                                                                                                                                                                                                                                                                                                                                                                                                                                                                                                                                                                                                                                                                                                                                                                                                                                                                                                                                                                                 |
| Date Submitted by the Author: | 31-Oct-2019                                                                                                                                                                                                                                                                                                                                                                                                                                                                                                                                                                                                                                                                                                                                                                                                                                                                                                                                                                                                                                                                                                                                                                                                                                                                                                                                                                                                                                                                                                                                                                                                                                                                                                                                                                                                                                                                                                                                                              |
| Complete List of Authors:     | <p>El-Kefraoui, Charbel; McGill University Health Centre, Steinberg-Bernstein Centre for Minimally Invasive Surgery and Innovation; McGill University, Division of Experimental Surgery</p> <p>Olleik, Ghadeer; McGill University Health Centre, Steinberg-Bernstein Centre for Minimally Invasive Surgery and Innovation; McGill University, Division of Experimental Surgery</p> <p>Chay, Marc-Aurele; McGill University Faculty of Medicine</p> <p>Kouyoumdjian, Araz; McGill University Health Centre, Steinberg-Bernstein Centre for Minimally Invasive Surgery and Innovation; McGill University, Department of Surgery</p> <p>Nguyen-Powanda, Philip; McGill University, Division of Experimental Surgery</p> <p>Rajabiyazdi, Fateme; McGill University Health Centre, Steinberg-Bernstein Centre for Minimally Invasive Surgery and Innovation; McGill University, Division of Experimental Surgery</p> <p>Do, Uyen; McGill University Health Centre, Steinberg-Bernstein Centre for Minimally Invasive Surgery and Innovation; McGill University, Division of Experimental Surgery</p> <p>Derksen, Alexa; McGill University, Child Health and Human Development Program; Clinical Research Institute of Montreal</p> <p>Landry, Tara; Universite de Montreal, Bibliothèque de la Santé</p> <p>Amar-Zifkin, Alexandre; McGill University Health Centre, Medical Libraries</p> <p>Ramanakumar, Agnihotram; McGill University, Department of Oncology</p> <p>Martel, Marc-Olivier; McGill University, Dentistry &amp; Anesthesia</p> <p>Baldini, Gabriele; McGill University, Department of Anaesthesia</p> <p>Feldman, Liane; McGill University Health Centre, Steinberg-Bernstein Centre for Minimally Invasive Surgery and Innovation; McGill University, Department of Surgery</p> <p>Fiore Jr, Julio; McGill University, Department of Surgery; McGill University Health Centre, Steinberg-Bernstein Centre for Minimally Invasive Surgery and Innovation</p> |
| Keywords:                     | SURGERY, PAIN MANAGEMENT, Adult surgery < SURGERY                                                                                                                                                                                                                                                                                                                                                                                                                                                                                                                                                                                                                                                                                                                                                                                                                                                                                                                                                                                                                                                                                                                                                                                                                                                                                                                                                                                                                                                                                                                                                                                                                                                                                                                                                                                                                                                                                                                        |
|                               |                                                                                                                                                                                                                                                                                                                                                                                                                                                                                                                                                                                                                                                                                                                                                                                                                                                                                                                                                                                                                                                                                                                                                                                                                                                                                                                                                                                                                                                                                                                                                                                                                                                                                                                                                                                                                                                                                                                                                                          |

1  
2  
3  
4  
5  
6  
7  
8  
9  
10  
11  
12  
13  
14  
15  
16  
17  
18  
19  
20  
21  
22  
23  
24  
25  
26  
27  
28  
29  
30  
31  
32  
33  
34  
35  
36  
37  
38  
39  
40  
41  
42  
43  
44  
45  
46  
47  
48  
49  
50  
51  
52  
53  
54  
55  
56  
57  
58  
59  
60

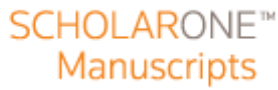

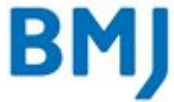

I, the Submitting Author has the right to grant and does grant on behalf of all authors of the Work (as defined in the below author licence), an exclusive licence and/or a non-exclusive licence for contributions from authors who are: i) UK Crown employees; ii) where BMJ has agreed a CC-BY licence shall apply, and/or iii) in accordance with the terms applicable for US Federal Government officers or employees acting as part of their official duties; on a worldwide, perpetual, irrevocable, royalty-free basis to BMJ Publishing Group Ltd ("BMJ") its licensees and where the relevant Journal is co-owned by BMJ to the co-owners of the Journal, to publish the Work in this journal and any other BMJ products and to exploit all rights, as set out in our [licence](#).

The Submitting Author accepts and understands that any supply made under these terms is made by BMJ to the Submitting Author unless you are acting as an employee on behalf of your employer or a postgraduate student of an affiliated institution which is paying any applicable article publishing charge ("APC") for Open Access articles. Where the Submitting Author wishes to make the Work available on an Open Access basis (and intends to pay the relevant APC), the terms of reuse of such Open Access shall be governed by a Creative Commons licence – details of these licences and which [Creative Commons](#) licence will apply to this Work are set out in our licence referred to above.

Other than as permitted in any relevant BMJ Author's Self Archiving Policies, I confirm this Work has not been accepted for publication elsewhere, is not being considered for publication elsewhere and does not duplicate material already published. I confirm all authors consent to publication of this Work and authorise the granting of this licence.

1  
2  
3 **Opioid versus opioid-free analgesia after surgical discharge: protocol for a systematic**  
4 **review and meta-analysis**  
5  
6

7  
8 Charbel El-Kefraoui <sup>1,2</sup>, Ghadeer Olleik <sup>1,2</sup>, Marc-Aurele Chay <sup>3</sup>, Araz Kouyoumdjian <sup>1,4</sup>, Philip  
9  
10 Nguyen-Powanda <sup>2</sup>, Fateme Rajabiyazdi <sup>1,2</sup>, Uyen Do <sup>1,2</sup>, Alexa Derksen <sup>5,6</sup>, Tara Landry <sup>7</sup>,  
11  
12 Alexandre Amar-Zifkin <sup>8</sup>, Raman Agnihotram <sup>9</sup>, Marc Martel <sup>10,11</sup>, Gabriele Baldini <sup>2,12</sup>, Liane S  
13  
14 Feldman <sup>1,2,4,8</sup>, Julio F Fiore Jr. <sup>1,2,4,8</sup>  
15  
16

17  
18 <sup>1</sup> Steinberg-Bernstein Centre for Minimally Invasive Surgery and Innovation, McGill University  
19  
20 Health Centre, Montreal, QC, Canada.  
21

22  
23 <sup>2</sup> Division of Experimental Surgery, McGill University, Montreal, QC, Canada.  
24

25  
26 <sup>3</sup> Faculty of Medicine, McGill University, Montreal, QC, Canada.  
27

28  
29 <sup>4</sup> Department of Surgery, McGill University, Montreal, QC, Canada.  
30

31  
32 <sup>5</sup> Child Health and Human Development Program, Research Institute of the McGill University  
33  
34 Health Centre, Montreal, Canada.  
35

36  
37 <sup>6</sup> Translational Proteomics Laboratory, Institut de Recherches Cliniques de Montréal, Montreal,  
38  
39 Canada.  
40

41  
42 <sup>7</sup> Bibliothèque de la santé, Université de Montréal, Montreal, QC, Canada.  
43

44  
45 <sup>8</sup> Medical Libraries, McGill University Health Centre, Montreal, QC, Canada.  
46

47  
48 <sup>9</sup> Centre for Outcomes Research and Evaluation (CORE), Research Institute of the McGill  
49  
50 University Health Centre, Montreal, QC, Canada.  
51

52  
53 <sup>10</sup> Experimental Medicine Division, McGill University, Montreal, Canada.  
54

55  
56 <sup>11</sup> Faculty of Dentistry and Department of Anaesthesia, McGill University, Montreal, Canada.  
57

58  
59 <sup>12</sup> Department of Anaesthesia, McGill University, Montreal, QC, Canada.  
60

1  
2  
3 **Correspondence and reprints:**  
4

5  
6 Julio Flavio Fiore Jr, PhD  
7

8  
9 Assistant Professor, Department of Surgery, McGill University  
10

11 Address: Montreal General Hospital. 1650 Cedar Ave, R2-104. Montreal, Quebec, H3G 1A4  
12

13  
14 Tel: (514) 709-2066  
15

16  
17 Fax: (514) 934-1934 (ext. 48475)  
18

19  
20 Email: julio.fiorejunior@mcgill.ca  
21

22  
23 **Word count: 3,179**  
24  
25  
26  
27  
28  
29  
30  
31  
32  
33  
34  
35  
36  
37  
38  
39  
40  
41  
42  
43  
44  
45  
46  
47  
48  
49  
50  
51  
52  
53  
54  
55  
56  
57  
58  
59  
60

## ABSTRACT

### Introduction

Excessive prescribing after surgery has contributed to a public health crisis of opioid addiction and overdose. However, the value of prescribing opioids to manage postoperative pain after surgical discharge remains unclear. We propose a systematic review and meta-analysis to assess the extent to which opioid analgesia impact postoperative pain intensity and adverse events in comparison to opioid-free analgesia in patients discharged after surgery.

### Methods and analysis

Major electronic databases (MEDLINE, EMBASE, Cochrane Library, Scopus, Amed, Biosis, CINAHL and PsycINFO) will be searched for multi-dose randomized trials examining the comparative-effectiveness of opioid versus opioid-free analgesia after surgical discharge. Studies published from January 1990 will be targeted, with no language restrictions. We will consider studies involving patients undergoing minor surgery (in-office procedures) and major surgery (operating room procedures). Teams of reviewers will, independently and in duplicate, assess study eligibility, extract data, and evaluate risk of bias. Our main outcomes of interest are pain intensity and postoperative vomiting (adverse event). Study results will be pooled using random-effects models. When trials report outcomes for a common domain (e.g. pain intensity) using different scales, we will convert effect sizes to a common standard metric (e.g. visual analog scale).

Minimally important clinical differences reported in previous literature will be considered when interpreting results. Sub-group analyses defined *a priori* will be conducted to explore heterogeneity among the pooled effect estimates. Risk of bias will be assessed according to the Cochrane Collaboration's Risk of Bias Tool 2.0. The quality of evidence for all outcomes will be evaluated using the GRADE rating system.

## Ethics and dissemination

Ethical approval is not required since this is a systematic review based on published studies. Our results will be published in a peer-reviewed journal and presented at relevant conferences.

## Strengths and limitations of this study

- This will be the first systematic review to synthesise the evidence on the comparative-effectiveness of opioid vs. opioid-free analgesia after postoperative discharge.
- This review will address a major knowledge gap that hinders the use of evidence-based prescribing as a strategy to mitigate postoperative opioid-related harms.
- We will use robust statistical methods to meta-analyse data from RCTs, but these methods are not free from limitations when outcome reporting is heterogeneous.
- The quality and strength of evidence will be evaluated using the Cochrane Collaboration's Risk of Bias Tool 2.0 and the GRADE framework.



## INTRODUCTION

North America is facing a devastating opioid crisis exacerbated by excessive prescribing.[1,2] Surgery often serves as a gateway for opioid-naïve patients to obtain an opioid prescription,[3] and spiral into misuse and addiction.[4-8] Reports from Canada and the United States suggest that 6-14% of patients who are prescribed opioids after surgical discharge become persistent opioid users, i.e. they continue to take the drug for more than three months after surgery.[5, 9-12] Interestingly, rates of persistent opioid use are similar among patients undergoing major,[5, 10, 11] and minor surgeries.[12] Patients who do not become persistent users postoperatively may also contribute to the opioid crisis by diverting unused tablets for nonmedical use by others - up to 70% of all opioid tablets prescribed to surgical patients go unused and may become a source for diversion.[13] Given these factors, recent literature suggests that postoperative opioid prescribing should be judicious and based on the best available evidence regarding benefits and harms.[14, 15]

Studies have shown that postoperative pain management using only non-opioid drugs is common internationally but not in Canada nor in the United States, where opioid tablets are often prescribed instead of, or in addition to, non-opioid analgesics.[16-20] In countries such as the Netherlands,[21] China,[22] and Chile,[23] reported rates of opioid prescribing after surgical discharge range from 0% to 5%, while in North America, 80% to 95% of patients receive an opioid prescription to manage postoperative pain at home.[16-20] A recent study indicates that surgical patients in Canada and the United States fill opioid prescriptions at a rate that is seven times higher than those in Sweden.[24] Remarkably, in countries where opioids are not a mainstay for postoperative analgesia, pain-related outcomes (i.e. satisfaction with pain management) after surgery are often superior to North America.[16-18] This may, in part, reflect a potential therapeutic superiority of non-opioid drugs or increased opioid-related adverse events such as postoperative vomiting. Although these findings bring

1  
2  
3 into question the value of prescribing opioids to manage acute pain after surgical discharge, the decision  
4 to prescribe opioids must be informed by robust systematic reviews and meta-analyses focused on the  
5 comparative-effectiveness of opioid versus opioid-free postoperative analgesia. These, however, are  
6 currently non-existent in the literature.[25]  
7  
8  
9

10  
11 We therefore propose to undertake a systematic review and meta-analysis to summarize the evidence  
12 regarding the comparative-effectiveness of opioid versus opioid-free analgesia after discharge following  
13 surgery. Our study will follow the principles of the PICO framework,[26] and aims to respond to the  
14 following research questions: (1) in patients discharged after surgery, to what extent does opioid  
15 analgesia impact postoperative pain intensity in comparison to opioid-free analgesia? And (2) in patients  
16 discharged after surgery, to what extent does opioid analgesia impact the risk of postoperative vomiting  
17 in comparison to opioid-free analgesia?  
18  
19  
20  
21  
22  
23  
24  
25  
26  
27

## 28 **METHODS AND ANALYSIS**

### 29 **Design**

30  
31 This protocol was designed according to the Preferred Reporting Items for Systematic Review and  
32 Meta-Analysis Protocols (PRISMA-P) statement.[27] A draft protocol was circulated among our  
33 knowledge synthesis team [composed of synthesis leaders (JF, GB, and LF), synthesis managers  
34 (CEK and UD), a patient partner (AD), and collaborators] and adjustments were made according to  
35 their feedback. Any future amendments to this protocol and corresponding rationale will be tracked  
36 and dated.  
37  
38  
39  
40  
41  
42  
43  
44  
45  
46  
47

### 48 **Literature search**

49  
50 A comprehensive search of major electronic databases [MEDLINE (via Ovid), EMBASE (via  
51 Ovid), The Cochrane Library (via Wiley), Scopus (via Elsevier), Amed (via Ovid), Biosis (via  
52 Clarivate), CINAHL (via Ebsco) and PsycINFO (via Ovid)] will be conducted to identify relevant  
53  
54  
55  
56  
57  
58  
59  
60

1  
2  
3 studies. The main strategy (MEDLINE) was developed by an experienced medical librarian and  
4 information specialist (TL) with input from the synthesis team (Supplement 1). Subsequently, a  
5 second medical librarian peer-reviewed this search strategy according to Peer Review of Electronic  
6 Search Strategies (PRESS) standards,[28] and changes were made as required. The vocabulary and  
7 syntax of the MEDLINE strategy was tailored to allow adaptation and optimal electronic searching  
8 of the other databases. Searches will be limited to articles published after 1990, as earlier  
9 publications do not reflect current standards of surgical care with the widespread use of minimally  
10 invasive surgery and perioperative care pathways.[29-32] No language limitation will be applied. A  
11 combined library of the retrieved articles will be created using Covidence systematic review  
12 software (Veritas Health Innovation, Melbourne, Australia; <https://www.covidence.org/>).[33]  
13 Duplicates will be excluded. To ensure literature saturation, we will also search trial registries  
14 (ClinicalTrials.gov and the WHO's International Clinical Trials Registry Platform), conference  
15 proceedings (identified via Scopus, Embase, Biosis, and Cochrane Library), articles cited by the  
16 included articles (identified via Scopus) and articles that cited the included articles (identified via  
17 Scopus). Furthermore, we will contact authors to obtain aggregated data from trials that were  
18 completed but not published.

### 40 **Eligibility criteria**

41  
42  
43 We will include studies that: (1) are parallel RCTs, (2) enrolled youth and/or adults patients (>15  
44 years old) undergoing minor or major surgeries according to the WHO definition,[34, 35] (Table 1),  
45 (3) compared a post-discharge analgesia regimen including opioids (analgesic drugs that act on  
46 opioid receptors, such as codeine, oxycodone, hydromorphone, tramadol, and morphine) versus an  
47 analgesia regimen including only non-opioid drugs (such as acetaminophen, NSAIDs,  
48 gabapentinoids) and (4) involved a multiple-dose design focused on the overall effect of repeated  
49  
50  
51  
52  
53  
54  
55  
56  
57  
58  
59  
60

1  
2  
3 doses of the prescribed analgesics. Our age cut-off was chosen based on data showing fast-growing  
4 rates of opioid poisoning in youth over 15 years old.[36, 37] Studies involving any non-invasive  
5 route of analgesic administration (i.e. oral, transmucosal, transdermal and rectal) will be considered  
6 for inclusion. Studies where opioids were offered to the opioid-free group as rescue analgesia for  
7 breakthrough pain (i.e. pain that erupts while a patient is already medicated) will be included only if  
8 the opioid drugs were not readily available to patients (i.e. a new prescription was required via  
9 contact with a healthcare provider). Studies where patients received opioids while in the hospital or  
10 clinic will be included if the post-discharge analgesia was according to our inclusion criteria.

11  
12 We will exclude single-dose trials as they do not reflect 'real-world' practices where analgesia  
13 regimens span several days postoperatively.[38] Besides, postoperative analgesia trials with a  
14 single-dose design have been extensively systematically reviewed in previous literature.[38, 39] We  
15 will also exclude: (1) placebo-controlled trials where no active analgesic drugs are offered to  
16 patients (they do not reflect standard practice), (2) studies where the postoperative analgesia  
17 regimen is not clearly described (e.g. placebo-controlled trials with unclear description of analgesics  
18 given in addition to placebo), (3) studies exclusively focused on children ( $\leq 15$  years old), (4)  
19 studies with analgesic administration via invasive routes such as intravenous or epidural (rarely  
20 used after surgical discharge), and (5) studies evaluating analgesia for chronic postoperative pain  
21 (treatment starting beyond 2 months after surgery).[40]

### 22 **Selection of studies**

23  
24 The titles/abstracts of the articles identified by our search strategy will be evaluated against the  
25 review's eligibility criteria by pairs of reviewers. Due to the anticipated large number of articles to  
26 be screened, eight reviewers (all with previous training in healthcare research) will be involved in  
27 the screening process. Screening will be conducted, independently and in duplicate, using the

1  
2  
3 Covidence software.[33] Two lead reviewers (JF and CEK) will pilot-test the eligibility criteria on  
4 the first 100 titles and abstracts identified by the search. To harmonize the rest of the screening  
5 process, reviewers will attend a training session and conduct a pilot screening of at least 20  
6 titles/abstracts to prompt clarifications. A screening decision table was created to guide decision-  
7 making (Supplement 2). To ensure accuracy, all titles/abstracts will be screened by at least one lead  
8 member of the synthesis team (JF or CEK). Disagreements regarding eligibility will be resolved by  
9 consensus between the reviewers or by consulting an adjudicator (LF).

10  
11  
12 Articles that are clearly irrelevant will be excluded after examination of titles and abstracts; those  
13 that are potentially eligible will have their full-text versions retrieved and evaluated against the  
14 eligibility criteria. Publications in non-English language will be translated into English by an ISO  
15 certified translation company. Full-text screening will be conducted by two lead members of the  
16 synthesis team (JF and CEK) using the Covidence platform.[33] The extent of agreement between  
17 reviewers during full-text screening will be assessed using Kappa statistics (thresholds: <0.20 slight  
18 agreement, 0.21–0.40 fair agreement, 0.41–0.60 moderate agreement, 0.61–0.80 substantial  
19 agreement and >0.80 almost perfect agreement).[41] Disagreements will be resolved by consensus  
20 or by consulting an adjudicator (LF).

## 21 22 23 **Outcome measures**

24 The primary outcome of interest in this review will be patient self-reported outcomes focused on  
25 postoperative pain intensity (i.e. self-perceived magnitude of pain at a given time postoperatively).

26 The secondary *a priori* outcome of interest will be the risk of postoperative vomiting. These  
27 outcomes were chosen based on previous literature that showed good pain relief to be the most  
28 desirable outcome in perioperative care according to patient preference, while postoperative  
29 vomiting is the least desirable outcome.[42-44] If data are available in the eligible studies, we will

1  
2  
3 also explore the association of the interventions with other endpoints included in core outcome sets  
4  
5 for research in perioperative care.[45, 46] These include: (1) drug adverse events (other than  
6  
7 vomiting), (2) patient satisfaction with pain management, (3) participant disposition (i.e. withdrawal  
8  
9 due to adverse events or ineffective treatment) (4) self-reported postoperative health status [overall  
10  
11 and domain-based scores, i.e. vitality (i.e. fatigue), physical function, emotional function, social  
12  
13 function, role function (i.e. work or other daily activities), sleep function], (5) emergency room  
14  
15 visits and (6) hospital readmissions.  
16  
17  
18

### 19 **Data charting**

20  
21  
22 A customized data extraction form was collectively developed by the synthesis team (Supplement  
23  
24 3). This form will be pilot tested by two independent reviewers (JF and CEK). Subsequently, a team  
25  
26 meeting will take place to discuss potential issues and refine the form. Finally, the refined data  
27  
28 extraction form will be integrated into the Covidence software.[33] Data extraction will be  
29  
30 conducted, independently and in duplicate, by pairs of reviewers. The following data will be  
31  
32 extracted from each study: author, publication date, study location, number of participating centres,  
33  
34 funding source, inclusion and exclusion criteria, sample size (patients randomized and patients  
35  
36 analysed in each group), patient characteristics (age, sex, clinical condition, type of surgery and  
37  
38 proportion receiving preoperative opioids, if available), surgery classification (major vs. minor),  
39  
40 type of anaesthesia, in-hospital analgesia interventions (if applicable), hospital length of stay (if  
41  
42 applicable), characteristics of the post-discharge analgesia intervention [drugs, dosage (in morphine  
43  
44 equivalents for opioids,[47]), frequency of administration and duration], outcome measures  
45  
46 assessed, time points of assessment and duration of follow-up.  
47  
48  
49  
50  
51

52  
53 The number of reviewers involved in data extraction will depend on the number of RCTs fulfilling  
54  
55 our eligibility criteria. To harmonize data extraction, reviewers will attend a training session,  
56  
57  
58  
59

1  
2  
3 conduct at least 2 pilot extractions, and receive a written ‘data extraction guide’ with detailed  
4  
5 instructions. To ensure accuracy, at least one lead member of the synthesis team (JF or CEK) will  
6  
7 extract data from each article. Data extracted in duplicate will be cross-checked by an independent  
8  
9 third reviewer. Discrepancies in the extracted data will be resolved by consensus between the  
10  
11 reviewers after revisiting the full-text article. If discrepancies remain, an adjudicator will be  
12  
13 consulted (LF).  
14  
15

16  
17 As this meta-analysis is focused on acute pain management after surgery, we will target outcome  
18  
19 data collected up to 30 days postoperatively (from the day when the trial analgesia regimens were  
20  
21 prescribed). Data regarding pain intensity (primary outcome) will be assessed as described in Table  
22  
23 2. Postoperative vomiting (secondary outcome) will be assessed as a dichotomous measure  
24  
25 (presence of vomiting: yes/no). The assessment of other outcomes will be exploratory and will  
26  
27 depend on whether data is available and how they are reported.  
28  
29  
30

### 31 **Methodological quality of individual studies**

32  
33 Risk of bias will be assessed independently and in duplicate by two lead members of the synthesis  
34  
35 team (JF and CEK) using the Cochrane Collaboration's Risk of Bias Tool 2.0 for randomized trials  
36  
37 (RoB 2.0).[48] Assessments will be conducted using an iterative form available online  
38  
39 (www.riskofbias.info/). The RoB 2.0 appraises risk of bias across five domains: (1) bias arising  
40  
41 from the randomization process, (2) bias due to deviations from intended interventions, (3) bias due  
42  
43 to missing outcome data, (4) bias in measurement of the outcome, and (5) bias in selection of the  
44  
45 reported result. The domain concerning missing outcome data will be assessed according to  
46  
47 Akl,[49] and Ebrahim.[50] For each domain, risk of bias will be judged as ‘low risk’, ‘some  
48  
49 concerns’, or ‘high risk’. Studies are considered to have an overall ‘high risk of bias’ if at least one  
50  
51  
52  
53  
54  
55  
56  
57  
58  
59  
60

1  
2  
3 domain is judged as ‘high risk’. Disagreements regarding risk of bias will be resolved by consensus  
4  
5 or by consulting an adjudicator (LF).  
6  
7

8 Quality of evidence (i.e. confidence in the effect estimates) will be assessed using the GRADE  
9  
10 rating system.[51] Assessment will be conducted on an outcome-by-outcome basis by two lead  
11  
12 members of the synthesis team (JF and CEK) working independently.[52] Specific guidelines will  
13  
14 be followed to improve reliability.[53-74] Disagreements will be resolved by consensus or by  
15  
16 consulting an adjudicator (LF). In the GRADE system, RCTs are initially rated as ‘high confidence’  
17  
18 evidence but may be rated down by one or more of five categories of limitations: (1) risk of bias, (2)  
19  
20 inconsistency, (3) indirectness, (4) imprecision, and (5) publication bias.[51] After considering  
21  
22 these categories, the confidence in estimates for each outcome will be categorized according to  
23  
24 Table 3. Publication bias will be formally assessed by visual assessment of funnel plot  
25  
26 asymmetry,[75] and by Begg’s test,[76] when there are at least 10 studies available for meta-  
27  
28 analysis. The final results will be summarized in an evidence profile.[51]  
29  
30  
31  
32  
33

### 34 **Data synthesis**

35  
36 For data synthesis, we will primarily assess the treatment effects of opioid versus opioid-free  
37  
38 analgesia across all surgical procedures that are eligible for this review; however, we will also  
39  
40 explore potential sources of heterogeneity between trials by assessing treatment effects across  
41  
42 specific surgical contexts. Meta-analyses will be conducted using random-effects models, which are  
43  
44 conservative in considering that the ‘true’ effect of an intervention may vary across different  
45  
46 trials.[77] Weighted mean differences (WMDs) and 95% confidence intervals (95% CIs) will be  
47  
48 calculated for pain intensity data reported by more than one RCT. The principle of ‘weighting’ by  
49  
50 the inverse of the variance aims to attribute more weight to studies that provide more information  
51  
52 about the treatment effect.[78] Methods described in the Cochrane Handbook will be used to  
53  
54  
55  
56  
57  
58  
59  
60



1  
2  
3 estimate the mean and standard deviation (SD) when median, range and sample size are reported,  
4 and to impute the SD if the standard error (SE) or SD for the differences are not reported.[79]

7 Relative risks (RRs) with associated 95% CIs will be calculated for dichotomous data reported by  
8 more than one RCT (i.e. secondary outcome: vomiting). Analyses will follow the Hartung-Knapp-  
9 Sidik-Jonkman method as evidence supports that this approach outperforms traditional random-  
10 effects methods such as DerSimonian-Laird (known to lead to high type I error rates when the  
11 number of studies is small and there is moderate or substantial heterogeneity).[80] All analyses will  
12 be conducted using Stata statistical software version (Version 15.1, StataCorp, College Station,  
13 Texas, USA). Comparisons will be 2-tailed and use a threshold  $p \leq 0.05$ .

14 Interpreting effect estimates for pain intensity is challenging as this outcome can be assessed using  
15 different scales [e.g. visual analog scale (VAS), numerical rating scale (NRS), SF-36 bodily pain  
16 scale, or other scales]. To address this issue, we will follow specific guidelines to standardize this  
17 outcome into a standard metric.[81-83] We chose the 10cm Pain Intensity VAS (score range 0-10  
18 cm; lower score represents less pain) as this is the pain intensity scale most commonly used in acute  
19 pain trials.[84-86] The process of standardization is described in Table 4. Once the WMD between  
20 opioid versus opioid-free analgesia is calculated for a given outcome, we will contextualize this  
21 value in relation to the corresponding minimally important difference (MID): the smallest change in  
22 score that patients perceive as important.[87] Reported MID in VAS pain scores for surgical  
23 patients, according to anchor-based methods, is 1/10cm.[88] As recommended by the OMERACT  
24 initiative,[81] we will use pain intensity WMD and MID data to determine the strength of the  
25 intervention effect, as described in Table 5.

26 When assessing pain intensity data, to further optimize the interpretation of meta-analyses results,  
27 we will also calculate the proportion of patients who reported adequate pain control (no more than  
28

1  
2  
3 mild pain, as determined by a pain score <3/10cm VAS).[88, 89] By assuming a normal distribution  
4 of postoperative pain scores in both groups, differences in risk of reporting adequate pain control  
5 will be derived with its associated 95% CIs.[81-83]  
6  
7

8  
9  
10 If we identify more than one trial measuring the exploratory outcomes of interest in this knowledge  
11 synthesis (e.g. patient satisfaction, self-reported postoperative health status, readmissions), data will  
12 be meta-analysed and reported as WMDs (continuous measures) or RRs (dichotomous measures),  
13 as appropriate. Where relevant, outcome data using different metrics will be converted into a  
14 standard metric according to guideline recommendations.[81-83] Focused literature searches will be  
15 conducted to identify anchor-based MIDs.[87]  
16  
17  
18  
19

20 Heterogeneity between the RCTs included in the meta-analyses will be assessed using the  $\chi^2$  test  
21 and the  $I^2$  test.[90] To explore potential sources of heterogeneity, we will test the *a priori*  
22 hypothesis that opioid analgesia has a larger effect in trials where patients are expected to feel more  
23 pain, such as those involving: (1) major surgery versus minor surgery,[5] (2) day surgery (i.e. with  
24 same-day discharge) versus in-patient surgery (i.e. at least one overnight stay in the hospital),[25]  
25 and (3) only women as participants [those reporting sex-specific data or involving sex-specific  
26 surgeries (e.g. gynaecological, breast)] versus men.[91-93] We also hypothesize that (4) trials with  
27 high risk of bias (versus lower risk of bias) will report larger effect sizes.[94, 95] Other clustering  
28 strategies for subgroup analyses [e.g. by surgical specialty (e.g. dental surgery, orthopaedic  
29 surgery), specific types of surgery (e.g. cholecystectomy, molar excision)] will be decided based on  
30 the characteristics of the trials identified, in consultation with clinicians (i.e. knowledge users) who  
31 care for the relevant surgical populations. These post-hoc subgroup analyses will be planned after  
32 data extraction, but prior to analyses of results. All subgroup analyses will be conducted regardless  
33  
34  
35  
36  
37  
38  
39  
40  
41  
42  
43  
44  
45  
46  
47  
48  
49  
50  
51  
52  
53  
54  
55  
56  
57  
58  
59  
60

1  
2  
3 of heterogeneity estimates if there are at least two trials in each subgroup. Tests of interaction will  
4  
5 be performed to establish if subgroups differed significantly from one another.[96]  
6  
7

## 8 **SIGNIFICANCE**

9

10  
11 North America is currently facing a major public-health crisis of opioid abuse. Opioid-based  
12  
13 postoperative pain management is recognized as one of the driving forces behind this crisis. Given  
14  
15 how commonly postoperative overprescription contributes to misuse, diversion, addiction and  
16  
17 death, there is an urgent need to address this element of the opioid crisis. Alternatives to opioids are  
18  
19 often overlooked, while they should be incorporated as the foundation of postoperative pain  
20  
21 management whenever possible. This may prevent more people from becoming addicted in the  
22  
23 future (it is impossible to become addicted without exposure) and, also importantly, reduce  
24  
25 diversion of unused prescriptions. Our systematic review will provide key information to guide  
26  
27 clinical decision-making regarding analgesia prescription after surgery. This work has the potential  
28  
29 to contribute practice-changing evidence to inform future guidelines aimed to improve analgesia  
30  
31 prescribing and mitigate postoperative opioid-related harms.  
32  
33  
34  
35

## 36 **ETHICS AND DISSEMINATION**

37

38  
39 The results of this study will be published in an international peer-reviewed journal and presented at  
40  
41 relevant conferences. This review will inform future guidelines on postoperative analgesia  
42  
43 prescription. Ethical approval is not required since this is a systematic review based on published  
44  
45 studies.  
46  
47  
48  
49  
50  
51  
52  
53  
54  
55  
56  
57  
58  
59  
60

## ACKNOWLEDGEMENTS

We thank Haley Montgomery, Aditya Pal, Rosa Lakabi, Andrew Miller and Sharlin Azad for their assistance in reviewing and editing the manuscript.

## AUTHORS' CONTRIBUTIONS

CEK, GB, LF, and JF contributed to the conception and the design of the study. CEK and JF wrote the first draft of the protocol. CEK, GO, MAC, AK, PNP, FR, UD, AD, TL, AAZ, RA, MM, GB, LF, and JF revised the protocol critically for important intellectual content. JF is the guarantor of this review. All authors have read and approved the final version of the manuscript to be published.

## FUNDING

This research is supported by funds from Fonds de Recherche du Québec-Santé granted to JF (Établissement de jeunes chercheurs, dossier #36799).

## COMPETING INTERESTS

JF has received grants from Merck and personal fees for consulting from Shionogi. LSF has received grants from Merck and Johnson & Johnson.

## TABLES

**Table 1. Definition of surgery (minor and major) according to the World Health Organization (WHO)**

|                      |                                                                                                                                                 |
|----------------------|-------------------------------------------------------------------------------------------------------------------------------------------------|
| <b>Surgery</b>       | Any intervention involving the incision, excision, manipulation or suturing of tissue and requiring regional or general anesthesia or sedation. |
| <b>Minor surgery</b> | A surgical intervention occurring <u>in a physician's office or clinic</u> (e.g. tooth extraction, cataract surgery, skin tumor excision).      |
| <b>Major surgery</b> | A surgical intervention occurring <u>in a hospital operating theatre</u> (e.g. cesarean section, appendectomy, open fracture repair).           |

**Table 2. Primary outcome data (pain intensity)**

|                                           |                                                                                                                                                                                                                                                                                                                                                                                                                                                                                                                                                                                                                                                                                              |
|-------------------------------------------|----------------------------------------------------------------------------------------------------------------------------------------------------------------------------------------------------------------------------------------------------------------------------------------------------------------------------------------------------------------------------------------------------------------------------------------------------------------------------------------------------------------------------------------------------------------------------------------------------------------------------------------------------------------------------------------------|
| <b>Pain assessment time points</b>        | <ul style="list-style-type: none"> <li>Multi-dose analgesia trials often involve the assessment of pain intensity at different time-points after surgery.</li> <li>We will focus on the following time points: Day 0 (6-12 hours after prescription), Day 1 (13-24 hours), Day 2 (25-48 hours), Day 3 (49-72 hours), Day 4-7 (3-168 hours), Day 8-30 (169 to 720 hours).</li> <li>These time points were the most commonly reported in the eligible trials identified by our scoping review and preliminary MEDLINE search.</li> <li>We will consider for analysis the last measure obtained within the timepoint interval (i.e. the measure closest to the interval upper bound)</li> </ul> |
| <b>The primary time point of interest</b> | <ul style="list-style-type: none"> <li>Our primary time point of interest will be <u>Day 1 (13-24 hours)</u>, as evidence suggests that this is the period after surgery when patients report most severe pain.</li> </ul>                                                                                                                                                                                                                                                                                                                                                                                                                                                                   |
| <b>Other important considerations</b>     | <ul style="list-style-type: none"> <li>We will prioritize reports of dynamic pain (during movement) over pain at rest if both are reported. Dynamic pain is deemed more relevant to the process of postoperative recovery.</li> <li>We will also prioritize reports of 'worst pain' over 'average pain'. The latter is highly influenced by variations in instructions (e.g. should periods without any pain accounted for when pain is 'averaged?').</li> </ul>                                                                                                                                                                                                                             |

**Table 3. GRADE certainty ratings**

| <b>Certainty</b> | <b>Interpretation</b>                                                                         |
|------------------|-----------------------------------------------------------------------------------------------|
| Very low         | The true effect is probably markedly different from the estimated effect.                     |
| Low              | The true effect might be markedly different from the estimated effect.                        |
| Moderate         | The authors believe that the true effect is probably close to the estimated effect.           |
| High             | The authors have a lot of confidence that the true effect is similar to the estimated effect. |

Adapted from <https://bestpractice.bmj.com/info/toolkit/learn-ebm/what-is-grade/>

**Table 4. Process of standardization (rescaling) of pain intensity measures into a common metric.**

|               |                                                                                                                                                                                                                                                                                                                                                                                  |
|---------------|----------------------------------------------------------------------------------------------------------------------------------------------------------------------------------------------------------------------------------------------------------------------------------------------------------------------------------------------------------------------------------|
| <b>Step 1</b> | <ul style="list-style-type: none"> <li>• Non-VAS pain intensity scales will be initially converted into standardized mean differences (SMD), by dividing the between-group differences in means (in each trial), by the pooled SD of the two groups.</li> <li>• The SMD expresses the intervention effect in SD units, rather than the original units of measurement.</li> </ul> |
| <b>Step 2</b> | <ul style="list-style-type: none"> <li>• Standardization will be done by multiplying the SMD by the SD of the VAS scale.</li> <li>• The SD used here will be the pooled SD obtained from the largest trial where pain intensity was assessed via VAS.</li> </ul>                                                                                                                 |
| <b>Step 3</b> | <ul style="list-style-type: none"> <li>• Standardized data (now presented as a VAS score) will be meta-analyzed with data from other trials (i.e. those that used VAS or had pain data converted into VAS) to calculate a pooled WMD in VAS scores.</li> </ul>                                                                                                                   |

**Table 5. Interpretation of weighed mean differences (WMDs) in relation to minimal important differences (MIDs)**

|                                                                |                                                                                                 |
|----------------------------------------------------------------|-------------------------------------------------------------------------------------------------|
| <b>Very large effect</b> (most patients are likely to benefit) | <b>WMD equal or above 2 MIDs</b> ( $WMD \geq 2MIDs$ )                                           |
| <b>Large effect</b> (many patients may benefit)                | <b>WMD equal or above 1 MID, but below 2 MIDs</b> ( $1 \text{ MID} \leq WMD < 2 \text{ MIDs}$ ) |
| <b>Moderate effect</b> (some patients may benefit)             | <b>WMD above 0.5 MID, but below 1 MID</b> ( $0.5 \text{ MID} < WMD < 1 \text{ MIDs}$ )          |
| <b>Small effect</b> (most patients are unlikely to benefit)    | <b>WMD equal or below 0.5 MID</b> ( $0.5 \text{ MID} \leq WMD < 1 \text{ MIDs}$ )               |

**REFERENCES**

1. The Lancet. The opioid crisis in the USA: a public health emergency. *Lancet* 2017;390(10107):2016. doi:10.1016/S0140-6736(17)32808-8
2. Fischer B, Pang M, Tyndall M. The opioid death crisis in Canada: crucial lessons for public health. *Lancet Public Health* 2019;4(2):e81-e82. doi:10.1016/S2468-2667(18)30232-9
3. Pasricha SV, Tadrous M, Khuu W, et al. Clinical indications associated with opioid initiation for pain management in Ontario, Canada: a population-based cohort study. *Pain* 2018;159(8):1562-1568. doi:10.1097/j.pain.0000000000001242
4. Alam A, Gomes T, Zheng H, et al. Long-term analgesic use after low-risk surgery: a retrospective cohort study. *Arch Intern Med* 2012;172(5):425-430. doi:10.1001/archinternmed.2011.1827
5. Brummett MC, Waljee JF, Goesling J, et al. New persistent opioid use after minor and major surgical procedures in US adults. *JAMA Surg* 2017;152(6):e170504. doi:10.1001/jamasurg.2017.0504
6. Clarke H, Soneji N, Ko DT, et al. Rates and risk factors for prolonged opioid use after major surgery: population based cohort study. *BMJ* 2014;348:g1251. doi:10.1136/bmj.g1251
7. Jiang X, Orton M, Feng R, et al. Chronic opioid usage in surgical patients in a large academic center. *Ann Surg* 2017;265(4):722-727. doi:10.1097/SLA.0000000000001780
8. Sun EC, Darnall BD, Baker LC, et al. Incidence of and risk factors for chronic opioid use among opioid-naive patients in the postoperative period. *JAMA Intern Med* 2016;176(9):1286-1293. doi:10.1001/jamainternmed.2016.3298

- 1  
2  
3 9. Brescia AA, Harrington CA, Mazurek AA, et al. Factors associated with new persistent opioid  
4 usage after lung resection. *Ann Thorac Surg* 2019;107(2):363-368.  
5  
6 doi:10.1016/j.athoracsur.2018.08.057  
7  
8
- 9  
10 10. Goesling J, Moser SE, Zaidi B, et al. Trends and predictors of opioid use after total knee and  
11 total hip arthroplasty. *Pain* 2016;157(6):1259-1265. doi:10.1097/j.pain.0000000000000516  
12  
13
- 14 11. Lee JS, Hu HM, Edelman AL, et al. New persistent opioid use among patients with cancer after  
15 curative-intent surgery. *J Clin Oncol* 2017;35(36):4042-4049. doi:10.1200/JCO.2017.74.1363  
16  
17
- 18 12. Schroeder AR, Dehghan M, Newman TB, et al. Association of opioid prescriptions from dental  
19 clinicians for US adolescents and young adults with subsequent opioid use and abuse. *JAMA*  
20  
21  
22  
23  
24  
25 *Intern Med* 2019;179(2):145-152. doi:10.1001/jamainternmed.2018.5419
- 26 13. Bicket MC, Long JJ, Pronovost PJ, et al. Prescription opioid analgesics commonly unused after  
27 surgery: a systematic review. *JAMA Surg* 2017;152(11):1066-1071.  
28  
29  
30  
31  
32 doi:10.1001/jamasurg.2017.0831
- 33 14. Neuman MD, Bateman BT, Wunsch H. Inappropriate opioid prescription after surgery. *Lancet*  
34  
35  
36  
37 2019;393(10180):1547-1557. doi:10.1016/S0140-6736(19)30428-3
- 38 15. Wu CL, King AB, Geiger TM, et al. American society for enhanced recovery and perioperative  
39 quality initiative joint consensus statement on perioperative opioid minimization in opioid-  
40 naïve patients. *Anesth Analg* 2019;129(2):567-577. doi:10.1213/ANE.00000000000004194  
41  
42  
43  
44
- 45 16. Barasch A, Safford MM, McNeal SF, et al. Patterns of postoperative pain medication  
46 prescribing after invasive dental procedures. *Spec Care Dentist* 2011;31(2):53-57.  
47  
48  
49  
50  
51  
52  
53  
54  
55  
56  
57  
58  
59  
60 doi:10.1111/j.1754-4505.2011.00181.x
17. Eid AI, DePesa C, Nordestgaard AT, et al. Variation of opioid prescribing patterns among  
patients undergoing similar surgery on the same acute care surgery service of the same



1  
2  
3  
4  
5  
6  
7  
8  
9  
10  
11  
12  
13  
14  
15  
16  
17  
18  
19  
20  
21  
22  
23  
24  
25  
26  
27  
28  
29  
30  
31  
32  
33  
34  
35  
36  
37  
38  
39  
40  
41  
42  
43  
44  
45  
46  
47  
48  
49  
50  
51  
52  
53  
54  
55  
56  
57  
58  
59  
60

institution: time for standardization? *Surgery* 2018;164(5):926-930.

doi:10.1016/j.surg.2018.05.047

18. Nooromid MJ, Blay E Jr., Holl JL, et al. Discharge prescription patterns of opioid and nonopioid analgesics after common surgical procedures. *Pain Rep* 2018;3(1):e637.  
doi:10.1097/PR9.0000000000000637
19. Thiels CA, Anderson SS, Ubl DS, et al. Wide variation and overprescription of opioids after elective surgery. *Ann Surg* 2017;266(4):564-573. doi:10.1097/SLA.0000000000002365
20. Lancaster E, Inglis-Arkell C, Hirose K, et al. Variability in opioid-prescribing patterns in endocrine surgery and discordance with patient use. *JAMA Surg* Published Online First: 14 August 2019. doi:10.1001/jamasurg.2019.2518
21. Lindenhovius ALC, Helmerhorst GTT, Schnellen AC, et al. Differences in prescription of narcotic pain medication after operative treatment of hip and ankle fractures in the United States and the Netherlands. *J Trauma* 2009;67(1):160-164. doi:10.1097/TA.0b013e31818c12ee
22. Li RJ, Loyo Li M, Leon E, et al. Comparison of opioid utilization patterns after major head and neck procedures between Hong Kong and the United States. *JAMA Otolaryngol Head Neck Surg* 2018;144(11):1060-1065. doi:10.1001/jamaoto.2018.1787
23. Fader L, Whitaker J, Lopez M, et al. Tibia fractures and NSAIDs. Does it make a difference? A multicenter retrospective study. *Injury* 2018;49(12):2290-2294.  
doi:10.1016/j.injury.2018.09.024
24. Ladha KS, Neuman MD, Broms G, et al. Opioid prescribing after surgery in the United States, Canada, and Sweden. *JAMA Netw Open* 2019;2(9):e1910734-e34.  
doi:10.1001/jamanetworkopen.2019.10734

- 1  
2  
3 25. Fiore Jr J, Olleik G, El-Kefraoui C, et al. Preventing opioid prescription after major surgery: A  
4 scoping literature review on opioid-free postoperative analgesia. *Br J Anaesth*  
5  
6 2019;123(5):627-636. doi:10.1016/j.bja.2019.08.014  
7  
8  
9  
10 26. Schardt C, Adams MB, Owens T, et al. Utilization of the PICO framework to improve  
11  
12 searching PubMed for clinical questions. *BMC Med Inform Decis Mak* 2007;7(1):16.  
13  
14 doi:10.1186/1472-6947-7-16  
15  
16  
17 27. Shamseer L, Moher D, Clarke M, et al. Preferred reporting items for systematic review and  
18  
19 meta-analysis protocols (PRISMA-P) 2015: elaboration and explanation. *BMJ* 2015;349:g7647.  
20  
21 doi: 10.1136/bmj.g7647  
22  
23  
24 28. McGowan J, Sampson M, Salzwedel DM, et al. PRESS peer review of electronic search  
25  
26 strategies: 2015 guideline statement. *J Clin Epidemiol* 2016;75(1):40-46.  
27  
28 doi:10.1016/j.jclinepi.2016.01.021  
29  
30  
31 29. Christensen GJ. The advantages of minimally invasive dentistry. *J Am Dent Assoc*  
32  
33 2005;136(11):1563-5. doi:10.14219/jada.archive.2005.0088  
34  
35  
36 30. Howard DH. Trends in the use of knee arthroscopy in adults. *JAMA Intern Med*  
37  
38 2018;178(11):1557-58. doi:10.1001/jamainternmed.2018.4175  
39  
40  
41 31. Waite PD, Cherala S. Surgical outcomes for suture-less surgery in 366 impacted third molar  
42  
43 patients. *J Oral Maxillofac Surg* 2006;64(4):669-73. doi:10.1016/j.joms.2005.12.014  
44  
45  
46 32. Donlon WC, Truta MP. Minimally invasive third molar surgery. *J Oral Maxillofac Surg*  
47  
48 2007;65(2):359. doi:10.1016/j.joms.2006.11.001  
49  
50  
51 33. Covidence Community. *Covidence*. 2019. [https://community.cochrane.org/help/tools-and-](https://community.cochrane.org/help/tools-and-software/covidence)  
52  
53 [software/covidence](https://community.cochrane.org/help/tools-and-software/covidence). Accessed September 02, 2019.  
54  
55  
56  
57  
58  
59  
60

- 1  
2  
3 34. Debas H GR, McCord C, Thind A. *Surgery*. Disease Control Priorities in Developing  
4 Countries, 2006. <https://www.who.int/surgery/SurgeryDebasworldbank.pdf?ua=1>. Accessed  
5  
6 September 09, 2019.  
7  
8  
9  
10 35. Weiser TG, Regenbogen SE, Thompson KD, et al. An estimation of the global volume of  
11 surgery: a modelling strategy based on available data. *Lancet* 2008;372(9633):139-44.  
12  
13 doi:10.1016/S0140-6736(08)60878-8  
14  
15  
16  
17 36. Government of Canada. *Canada's Opioid Crisis (fact sheet)*. 2019.  
18  
19 <https://www.canada.ca/en/health-canada/services/publications/healthy-living/canada-opioid->  
20 [crisis-fact-sheet.html](https://www.canada.ca/en/health-canada/services/publications/healthy-living/canada-opioid-). Accessed September 30, 2019.  
21  
22  
23  
24 37. Gomes T, Tadrous M, Mamdani MM, et al. The burden of opioid-related mortality in the  
25 United States. *JAMA Netw Open* 2018;1(2):e180217-e17.  
26  
27 doi:10.1001/jamanetworkopen.2018.0217  
28  
29  
30  
31 38. Moore RA, Derry S, Aldington D, et al. Single dose oral analgesics for acute postoperative pain  
32 in adults - an overview of Cochrane reviews. *Cochrane Database Syst Rev* 2015(9):CD008659.  
33  
34 doi:10.1002/14651858.CD008659.pub3  
35  
36  
37  
38 39. Moore RA, Derry S, Aldington D, et al. Adverse events associated with single dose oral  
39 analgesics for acute postoperative pain in adults - an overview of Cochrane reviews. *Cochrane*  
40 *Database Syst Rev* 2015(10):CD011407. doi:10.1002/14651858.CD011407.pub2  
41  
42  
43  
44  
45 40. Macrae WA. Chronic pain after surgery. *Br J Anaesth* 2001;87(1):88-98.  
46  
47 doi:10.1093/bja/87.1.88  
48  
49  
50 41. Landis JR, Koch GG. The measurement of observer agreement for categorical data. *Biometrics*  
51 1977;33(1):159-74. doi:10.2307/2529310  
52  
53  
54  
55  
56  
57  
58  
59  
60

- 1  
2  
3 42. Carvalho B, Cohen SE, Lipman SS, et al. Patient preferences for anesthesia outcomes  
4 associated with cesarean delivery. *Anesth Analg* 2005;101(4):1182-7.  
5  
6 doi:10.1213/01.ane.0000167774.36833.99  
7  
8  
9  
10 43. Gan TJ, Lubarsky DA, Flood EM, et al. Patient preferences for acute pain treatment. *Br J*  
11  
12 *Anaesth* 2004;92(5):681-88. doi:10.1093/bja/aeh123  
13  
14 44. Macario A, Weinger M, Carney S, et al. Which clinical anesthesia outcomes are important to  
15 avoid? The perspective of patients. *Anesth Analg* 1999;89(3):652-8. doi:10.1097/00000539-  
16 199909000-00022  
17  
18  
19  
20 45. Jammer I, Wickboldt N, Sander M, et al. Standards for definitions and use of outcome  
21 measures for clinical effectiveness research in perioperative medicine: European Perioperative  
22 Clinical Outcome (EPCO) definitions: a statement from the ESA-ESICM joint taskforce on  
23 perioperative outcome measures. *Eur J Anaesthesiol* 2015;32(2):88-105.  
24  
25 doi:10.1097/eja.0000000000000118  
26  
27  
28  
29  
30  
31  
32 46. Myles PS, Boney O, Botti M, et al. Systematic review and consensus definitions for the  
33 standardised endpoints in perioperative medicine (StEP) initiative: patient comfort. *Br J*  
34 *Anaesth* 2018;120(4):705-11. doi:10.1016/j.bja.2017.12.037  
35  
36  
37  
38  
39 47. Nielsen S, Degenhardt L, Hoban B, et al. A synthesis of oral morphine equivalents (OME) for  
40 opioid utilisation studies. *Pharmacoepidemiol Drug Saf* 2016;25(6):733-7.  
41  
42  
43  
44  
45  
46  
47 48. Sterne J, Savović J, Page MJ, et al. RoB 2: a revised tool for assessing risk of bias in  
48 randomised trials. *BMJ* 2019;366:l4898. doi:10.1136/bmj.l4898  
49  
50  
51 49. Akobeng AK. Understanding systematic reviews and meta-analysis. *Arch Dis Child*  
52 2005;90:845-48. doi:10.1136/adc.2004.058230  
53  
54  
55  
56  
57  
58  
59  
60

- 1  
2  
3 50. Ebrahim S, Akl EA, Mustafa RA, et al. Addressing continuous data for participants excluded  
4 from trial analysis: a guide for systematic reviewers. *J Clin Epidemiol* 2013;66(9):1014-21.  
5  
6 doi:10.1016/j.jclinepi.2013.03.014  
7  
8  
9  
10 51. Guyatt GH, Oxman AD, Vist GE, et al. GRADE: an emerging consensus on rating quality of  
11 evidence and strength of recommendations. *BMJ* 2008;336(7650):924-26.  
12  
13 doi:10.1136/bmj.39489.470347.AD  
14  
15  
16  
17 52. Meader N, King K, Llewellyn A, et al. A checklist designed to aid consistency and  
18 reproducibility of GRADE assessments: development and pilot validation. *Syst Rev*  
19 2014;3(1):82. doi:10.1186/2046-4053-3-82  
20  
21  
22  
23  
24 53. Andrews J, Guyatt G, Oxman AD, et al. GRADE guidelines: 14. Going from evidence to  
25 recommendations: the significance and presentation of recommendations. *J Clin Epidemiol*  
26 2013;66(7):719-25. doi:10.1016/j.jclinepi.2012.03.013  
27  
28  
29  
30  
31 54. Andrews JC, Schunemann HJ, Oxman AD, et al. GRADE guidelines: 15. Going from evidence  
32 to recommendation-determinants of a recommendation's direction and strength. *J Clin*  
33 *Epidemiol* 2013;66(7):726-35. doi:10.1016/j.jclinepi.2013.02.003  
34  
35  
36  
37  
38 55. Balshem H, Helfand M, Schunemann HJ, et al. GRADE guidelines: 3. Rating the quality of  
39 evidence. *J Clin Epidemiol* 2011;64(4):401-6. doi:10.1016/j.jclinepi.2010.07.015  
40  
41  
42  
43 56. Brunetti M, Shemilt I, Pregno S, et al. GRADE guidelines: 10. Considering resource use and  
44 rating the quality of economic evidence. *J Clin Epidemiol* 2013;66(2):140-50.  
45  
46 doi:10.1016/j.jclinepi.2012.04.012  
47  
48  
49 57. Guyatt G, Oxman AD, Akl EA, et al. GRADE guidelines: 1. Introduction-GRADE evidence  
50 profiles and summary of findings tables. *J Clin Epidemiol* 2011;64(4):383-94.  
51  
52  
53  
54  
55  
56  
57  
58  
59  
60

- 1  
2  
3 58. Guyatt G, Oxman AD, Sultan S, et al. GRADE guidelines: 11. Making an overall rating of  
4 confidence in effect estimates for a single outcome and for all outcomes. *J Clin Epidemiol*  
5 2013;66(2):151-7. doi:10.1016/j.jclinepi.2012.01.006  
6  
7  
8  
9  
10 59. Guyatt GH, Ebrahim S, Alonso-Coello P, et al. GRADE guidelines 17: assessing the risk of  
11 bias associated with missing participant outcome data in a body of evidence. *J Clin Epidemiol*  
12 2017;87:14-22. doi:10.1016/j.jclinepi.2017.05.005  
13  
14  
15  
16  
17 60. Guyatt GH, Oxman AD, Kunz R, et al. GRADE guidelines: 2. Framing the question and  
18 deciding on important outcomes. *J Clin Epidemiol* 2011;64(4):395-400.  
19  
20  
21  
22  
23  
24 61. Guyatt GH, Oxman AD, Kunz R, et al. GRADE guidelines 6. Rating the quality of evidence--  
25 imprecision. *J Clin Epidemiol* 2011;64(12):1283-93. doi:10.1016/j.jclinepi.2011.01.012  
26  
27  
28  
29 62. Guyatt GH, Oxman AD, Kunz R, et al. GRADE guidelines: 8. Rating the quality of evidence--  
30 indirectness. *J Clin Epidemiol* 2011;64(12):1303-10. doi:10.1016/j.jclinepi.2011.04.014  
31  
32  
33  
34 63. Guyatt GH, Oxman AD, Kunz R, et al. GRADE guidelines: 7. Rating the quality of evidence--  
35 inconsistency. *J Clin Epidemiol* 2011;64(12):1294-302. doi:10.1016/j.jclinepi.2011.03.017  
36  
37  
38  
39 64. Guyatt GH, Oxman AD, Montori V, et al. GRADE guidelines: 5. Rating the quality of  
40 evidence--publication bias. *J Clin Epidemiol* 2011;64(12):1277-82.  
41  
42  
43  
44  
45 65. Guyatt GH, Oxman AD, Santesso N, et al. GRADE guidelines: 12. Preparing summary of  
46 findings tables-binary outcomes. *J Clin Epidemiol* 2013;66(2):158-72.  
47  
48  
49  
50  
51 66. Guyatt GH, Oxman AD, Sultan S, et al. GRADE guidelines: 9. Rating up the quality of  
52 evidence. *J Clin Epidemiol* 2011;64(12):1311-6. doi:10.1016/j.jclinepi.2011.06.004  
53  
54  
55  
56  
57  
58  
59  
60

- 1  
2  
3 67. Guyatt GH, Oxman AD, Vist G, et al. GRADE guidelines: 4. Rating the quality of evidence--  
4 study limitations (risk of bias). *J Clin Epidemiol* 2011;64(4):407-15.  
5  
6 doi:10.1016/j.jclinepi.2010.07.017  
7  
8  
9  
10 68. Guyatt GH, Thorlund K, Oxman AD, et al. GRADE guidelines: 13. Preparing summary of  
11 findings tables and evidence profiles-continuous outcomes. *J Clin Epidemiol* 2013;66(2):173-  
12 83. doi:10.1016/j.jclinepi.2012.08.001  
13  
14  
15  
16  
17 69. Kumar A, Miladinovic B, Guyatt GH, et al. GRADE guidelines system is reproducible when  
18 instructions are clearly operationalized even among the guidelines panel members with limited  
19 experience with GRADE. *J Clin Epidemiol* 2016;75:115-8. doi:10.1016/j.jclinepi.2015.11.020  
20  
21  
22  
23  
24 70. Schunemann HJ, Cuello C, Akl EA, et al. GRADE guidelines: 18. How ROBINS-I and other  
25 tools to assess risk of bias in nonrandomized studies should be used to rate the certainty of a  
26 body of evidence. *J Clin Epidemiol* 2019;111:105-14. doi:10.1016/j.jclinepi.2018.01.012  
27  
28  
29  
30  
31 71. Schunemann HJ, Mustafa R, Brozek J, et al. GRADE Guidelines: 16. GRADE evidence to  
32 decision frameworks for tests in clinical practice and public health. *J Clin Epidemiol*  
33 2016;76:89-98. doi:10.1016/j.jclinepi.2016.01.032  
34  
35  
36  
37  
38 72. Schunemann HJ, Mustafa RA, Brozek J, et al. GRADE guidelines: 22. The GRADE approach  
39 for tests and strategies-from test accuracy to patient-important outcomes and recommendations.  
40 *J Clin Epidemiol* 2019;111:69-82. doi:10.1016/j.jclinepi.2019.02.003  
41  
42  
43  
44  
45 73. Zhang Y, Alonso-Coello P, Guyatt GH, et al. GRADE Guidelines: 19. Assessing the certainty  
46 of evidence in the importance of outcomes or values and preferences-Risk of bias and  
47 indirectness. *J Clin Epidemiol* 2019;111:94-104. doi:10.1016/j.jclinepi.2018.01.013  
48  
49  
50  
51  
52  
53  
54  
55  
56  
57  
58  
59  
60

- 1  
2  
3 74. Zhang Y, Coello PA, Guyatt GH, et al. GRADE guidelines: 20. Assessing the certainty of  
4 evidence in the importance of outcomes or values and preferences-inconsistency, imprecision,  
5 and other domains. *J Clin Epidemiol* 2019;111:83-93. doi:10.1016/j.jclinepi.2018.05.011  
6  
7  
8  
9  
10 75. Sterne JAC, Sutton AJ, Ioannidis JPA, et al. Recommendations for examining and interpreting  
11 funnel plot asymmetry in meta-analyses of randomised controlled trials. *BMJ* 2011;343:d4002.  
12 doi:10.1136/bmj.d4002  
13  
14  
15  
16 76. Begg CB, Mazumdar M. Operating characteristics of a rank correlation test for publication  
17 bias. *Biometrics* 1994;50(4):1088-101. doi:10.2307/2533446  
18  
19  
20  
21 77. Serghiou S, Goodman SN. Random-effects meta-analysis: summarizing evidence with caveats.  
22 *JAMA* 2019;321(3):301-02. doi:10.1001/jama.2018.19684  
23  
24  
25  
26 78. Marín-Martínez F, Sánchez-Meca J. Weighting by inverse variance or by sample size in  
27 random-effects meta-analysis. *Educ Psychol Meas* 2009;70(1):56-73.  
28  
29  
30  
31  
32  
33 79. Higgins JPT, Green S. *Cochrane handbook for systematic reviews of interventions*. The  
34 Cochrane Collaboration, 2011. <https://handbook-5-1.cochrane.org>. Accessed Mar 23, 2011.  
35  
36  
37  
38 80. IntHout J, Ioannidis JPA, Borm GF. The Hartung-Knapp-Sidik-Jonkman method for random  
39 effects meta-analysis is straightforward and considerably outperforms the standard  
40 DerSimonian-Laird method. *BMC Med Res Methodol* 2014;14(1):25. doi:10.1186/1471-2288-  
41 14-25  
42  
43  
44  
45  
46  
47 81. Busse JW, Bartlett SJ, Dougados M, et al. Optimal strategies for reporting pain in clinical trials  
48 and systematic reviews: recommendations from an OMERACT 12 workshop. *J Rheumatol*  
49 2015;42(10):1962. doi:10.3899/jrheum.141440  
50  
51  
52  
53  
54  
55  
56  
57  
58  
59  
60



- 1  
2  
3 82. Murad MH, Wang Z, Chu H, et al. When continuous outcomes are measured using different  
4 scales: guide for meta-analysis and interpretation. *BMJ* 2019;364:k4817.  
5  
6 doi:10.1136/bmj.k4817  
7  
8  
9  
10 83. Thorlund K, Walter SD, Johnston BC, et al. Pooling health-related quality of life outcomes in  
11 meta-analysis—a tutorial and review of methods for enhancing interpretability. *Res Synth*  
12 *Methods* 2011;2(3):188-203. doi:10.1002/jrsm.46  
13  
14  
15  
16  
17 84. Gewandter JS, Eisenach JC, Gross RA, et al. Checklist for the preparation and review of pain  
18 clinical trial publications: a pain-specific supplement to CONSORT. *Pain Rep* 2019;4(3):e621.  
19  
20 doi:10.1097/pr9.0000000000000621  
21  
22  
23  
24 85. Gilron I, Carr DB, Desjardins PJ, et al. Current methods and challenges for acute pain clinical  
25 trials. *Pain Rep* 2019;4(3):e647. doi:10.1097/pr9.0000000000000647  
26  
27  
28  
29 86. Sirintawat N, Sawang K, Chaiyasamut T, et al. Pain measurement in oral and maxillofacial  
30 surgery. *J Dent Anesth Pain Med* 2017;17(4):253-63. doi:10.17245/jdapm.2017.17.4.253  
31  
32  
33 87. Schunemann HJ, Guyatt GH. Commentary--goodbye M(C)ID! Hello MID, where do you come  
34 from? *Heath Serv Res* 2005;40(2):593-7. doi:10.1111/j.1475-6773.2005.00374.x  
35  
36  
37  
38 88. Myles PS, Myles DB, Gallagher W, et al. Measuring acute postoperative pain using the visual  
39 analog scale: the minimal clinically important difference and patient acceptable symptom state.  
40 *Br J Anaesth* 2017;118(3):424-29. doi:10.1093/bja/aew466  
41  
42  
43  
44 89. Moore RA, Straube S, Aldington D. Pain measures and cut-offs - 'no worse than mild pain' as a  
45 simple, universal outcome. *Anaesthesia* 2013;68(4):400-12. doi:10.1111/anae.12148  
46  
47  
48  
49 90. Higgins JPT, Thompson SG, Deeks JJ, et al. Measuring inconsistency in meta-analyses. *BMJ*  
50 2003;327(7414):557-60. doi:10.1136/bmj.327.7414.557  
51  
52  
53  
54  
55  
56  
57  
58  
59  
60

- 1  
2  
3 91. Bjornnes AK, Parry M, Lie I, et al. Pain experiences of men and women after cardiac surgery. *J*  
4  
5 *Clin Nurs* 2016;25(19-20):3058-68. doi:10.1111/jocn.13329  
6  
7  
8 92. Cepeda MS, Carr DB. Women experience more pain and require more morphine than men to  
9  
10 achieve a similar degree of analgesia. *Anesth Analg* 2003;97(5):1464-8.  
11  
12 doi:10.1213/01.ane.0000080153.36643.83  
13  
14  
15 93. Rosseland LA, Stubhaug A. Gender is a confounding factor in pain trials: women report more  
16  
17 pain than men after arthroscopic surgery. *Pain* 2004;112(3):248-53.  
18  
19 doi:10.1016/j.pain.2004.08.028  
20  
21  
22 94. Moher D, Pham B, Jones A, et al. Does quality of reports of randomised trials affect estimates  
23  
24 of intervention efficacy reported in meta-analyses? *Lancet* 1998;352(9128):609-13.  
25  
26 doi:10.1016/s0140-6736(98)01085-x  
27  
28  
29 95. Pildal J, Hrobjartsson A, Jorgensen KJ, et al. Impact of allocation concealment on conclusions  
30  
31 drawn from meta-analyses of randomized trials. *Int J Epidemiol* 2007;36(4):847-57.  
32  
33 doi:10.1093/ije/dym087  
34  
35  
36 96. Altman DG, Bland JM. Interaction revisited: the difference between two estimates. *BMJ*  
37  
38 2003;326(7382):219. doi:10.1136/bmj.326.7382.219  
39  
40  
41  
42  
43  
44  
45  
46  
47  
48  
49  
50  
51  
52  
53  
54  
55  
56  
57  
58  
59  
60

# Supplementary Material

## Table of Contents

|                                                       |    |
|-------------------------------------------------------|----|
| Supplement 1. Medline search strategy.....            | 2  |
| Supplement 2. Abstract screening decision tables..... | 10 |
| Supplement 3. Data extraction form .....              | 11 |

For peer review only

## Supplement 1. Medline search strategy

| #  | Searches                                                           |
|----|--------------------------------------------------------------------|
| 1  | Pain, Postoperative/                                               |
| 2  | Postoperative Care/                                                |
| 3  | Postoperative Period/                                              |
| 4  | ((after or following) adj3 (procedur* or resect* or surg*)).tw,kf. |
| 5  | (post-operat* or postoperat* or post-surg* or postsurg*).tw,kf.    |
| 6  | or/2-5                                                             |
| 7  | (analgaes* or analges* or pain).tw,hw,kf.                          |
| 8  | 6 and 7                                                            |
| 9  | 1 or 8                                                             |
| 10 | Acetaminophen/                                                     |
| 11 | exp Adrenal Cortex Hormones/                                       |
| 12 | Amitriptyline/                                                     |
| 13 | exp Analgesics, Non-Narcotic/                                      |
| 14 | Anesthesia, Local/                                                 |
| 15 | exp Anesthetics, Local/                                            |
| 16 | exp Anticonvulsants/                                               |
| 17 | exp Anti-Inflammatory Agents, Non-Steroidal/                       |
| 18 | Aspirin/                                                           |
| 19 | Baclofen/                                                          |
| 20 | Bupivacaine/                                                       |
| 21 | Carbamazepine/                                                     |
| 22 | Celecoxib/                                                         |
| 23 | Clonidine/                                                         |
| 24 | exp Cyclooxygenase 2 Inhibitors/                                   |
| 25 | Desipramine/                                                       |
| 26 | Dexamethasone/                                                     |
| 27 | Dexmedetomidine/                                                   |
| 28 | Diclofenac/                                                        |
| 29 | Diflunisal/                                                        |
| 30 | Dipyron/                                                           |
| 31 | Duloxetine Hydrochloride/                                          |
| 32 | Fenoprofen/                                                        |
| 33 | Flurbiprofen/                                                      |
| 34 | Gabapentin/                                                        |
| 35 | gamma-Aminobutyric Acid/                                           |
| 36 | Ibuprofen/                                                         |
| 37 | Indomethacin/                                                      |
| 38 | Ketamine/                                                          |
| 39 | Ketoprofen/                                                        |
| 40 | Ketorolac/                                                         |
| 41 | Ketorolac Tromethamine/                                            |
| 42 | Lidocaine/                                                         |

|    |                                                                                                                                                                                                                                                                                                                                                                                                                                                                                                                                                                                                                                                                                                                                                                                                                                                                                                                                                                                                                |
|----|----------------------------------------------------------------------------------------------------------------------------------------------------------------------------------------------------------------------------------------------------------------------------------------------------------------------------------------------------------------------------------------------------------------------------------------------------------------------------------------------------------------------------------------------------------------------------------------------------------------------------------------------------------------------------------------------------------------------------------------------------------------------------------------------------------------------------------------------------------------------------------------------------------------------------------------------------------------------------------------------------------------|
| 1  |                                                                                                                                                                                                                                                                                                                                                                                                                                                                                                                                                                                                                                                                                                                                                                                                                                                                                                                                                                                                                |
| 2  |                                                                                                                                                                                                                                                                                                                                                                                                                                                                                                                                                                                                                                                                                                                                                                                                                                                                                                                                                                                                                |
| 3  |                                                                                                                                                                                                                                                                                                                                                                                                                                                                                                                                                                                                                                                                                                                                                                                                                                                                                                                                                                                                                |
| 4  |                                                                                                                                                                                                                                                                                                                                                                                                                                                                                                                                                                                                                                                                                                                                                                                                                                                                                                                                                                                                                |
| 5  |                                                                                                                                                                                                                                                                                                                                                                                                                                                                                                                                                                                                                                                                                                                                                                                                                                                                                                                                                                                                                |
| 6  |                                                                                                                                                                                                                                                                                                                                                                                                                                                                                                                                                                                                                                                                                                                                                                                                                                                                                                                                                                                                                |
| 7  |                                                                                                                                                                                                                                                                                                                                                                                                                                                                                                                                                                                                                                                                                                                                                                                                                                                                                                                                                                                                                |
| 8  |                                                                                                                                                                                                                                                                                                                                                                                                                                                                                                                                                                                                                                                                                                                                                                                                                                                                                                                                                                                                                |
| 9  |                                                                                                                                                                                                                                                                                                                                                                                                                                                                                                                                                                                                                                                                                                                                                                                                                                                                                                                                                                                                                |
| 10 |                                                                                                                                                                                                                                                                                                                                                                                                                                                                                                                                                                                                                                                                                                                                                                                                                                                                                                                                                                                                                |
| 11 |                                                                                                                                                                                                                                                                                                                                                                                                                                                                                                                                                                                                                                                                                                                                                                                                                                                                                                                                                                                                                |
| 12 |                                                                                                                                                                                                                                                                                                                                                                                                                                                                                                                                                                                                                                                                                                                                                                                                                                                                                                                                                                                                                |
| 13 |                                                                                                                                                                                                                                                                                                                                                                                                                                                                                                                                                                                                                                                                                                                                                                                                                                                                                                                                                                                                                |
| 14 |                                                                                                                                                                                                                                                                                                                                                                                                                                                                                                                                                                                                                                                                                                                                                                                                                                                                                                                                                                                                                |
| 15 |                                                                                                                                                                                                                                                                                                                                                                                                                                                                                                                                                                                                                                                                                                                                                                                                                                                                                                                                                                                                                |
| 16 |                                                                                                                                                                                                                                                                                                                                                                                                                                                                                                                                                                                                                                                                                                                                                                                                                                                                                                                                                                                                                |
| 17 |                                                                                                                                                                                                                                                                                                                                                                                                                                                                                                                                                                                                                                                                                                                                                                                                                                                                                                                                                                                                                |
| 18 |                                                                                                                                                                                                                                                                                                                                                                                                                                                                                                                                                                                                                                                                                                                                                                                                                                                                                                                                                                                                                |
| 19 |                                                                                                                                                                                                                                                                                                                                                                                                                                                                                                                                                                                                                                                                                                                                                                                                                                                                                                                                                                                                                |
| 20 |                                                                                                                                                                                                                                                                                                                                                                                                                                                                                                                                                                                                                                                                                                                                                                                                                                                                                                                                                                                                                |
| 21 |                                                                                                                                                                                                                                                                                                                                                                                                                                                                                                                                                                                                                                                                                                                                                                                                                                                                                                                                                                                                                |
| 22 |                                                                                                                                                                                                                                                                                                                                                                                                                                                                                                                                                                                                                                                                                                                                                                                                                                                                                                                                                                                                                |
| 23 |                                                                                                                                                                                                                                                                                                                                                                                                                                                                                                                                                                                                                                                                                                                                                                                                                                                                                                                                                                                                                |
| 24 |                                                                                                                                                                                                                                                                                                                                                                                                                                                                                                                                                                                                                                                                                                                                                                                                                                                                                                                                                                                                                |
| 25 |                                                                                                                                                                                                                                                                                                                                                                                                                                                                                                                                                                                                                                                                                                                                                                                                                                                                                                                                                                                                                |
| 26 |                                                                                                                                                                                                                                                                                                                                                                                                                                                                                                                                                                                                                                                                                                                                                                                                                                                                                                                                                                                                                |
| 27 |                                                                                                                                                                                                                                                                                                                                                                                                                                                                                                                                                                                                                                                                                                                                                                                                                                                                                                                                                                                                                |
| 28 |                                                                                                                                                                                                                                                                                                                                                                                                                                                                                                                                                                                                                                                                                                                                                                                                                                                                                                                                                                                                                |
| 29 |                                                                                                                                                                                                                                                                                                                                                                                                                                                                                                                                                                                                                                                                                                                                                                                                                                                                                                                                                                                                                |
| 30 |                                                                                                                                                                                                                                                                                                                                                                                                                                                                                                                                                                                                                                                                                                                                                                                                                                                                                                                                                                                                                |
| 31 |                                                                                                                                                                                                                                                                                                                                                                                                                                                                                                                                                                                                                                                                                                                                                                                                                                                                                                                                                                                                                |
| 32 |                                                                                                                                                                                                                                                                                                                                                                                                                                                                                                                                                                                                                                                                                                                                                                                                                                                                                                                                                                                                                |
| 33 |                                                                                                                                                                                                                                                                                                                                                                                                                                                                                                                                                                                                                                                                                                                                                                                                                                                                                                                                                                                                                |
| 34 |                                                                                                                                                                                                                                                                                                                                                                                                                                                                                                                                                                                                                                                                                                                                                                                                                                                                                                                                                                                                                |
| 35 |                                                                                                                                                                                                                                                                                                                                                                                                                                                                                                                                                                                                                                                                                                                                                                                                                                                                                                                                                                                                                |
| 36 |                                                                                                                                                                                                                                                                                                                                                                                                                                                                                                                                                                                                                                                                                                                                                                                                                                                                                                                                                                                                                |
| 37 |                                                                                                                                                                                                                                                                                                                                                                                                                                                                                                                                                                                                                                                                                                                                                                                                                                                                                                                                                                                                                |
| 38 |                                                                                                                                                                                                                                                                                                                                                                                                                                                                                                                                                                                                                                                                                                                                                                                                                                                                                                                                                                                                                |
| 39 |                                                                                                                                                                                                                                                                                                                                                                                                                                                                                                                                                                                                                                                                                                                                                                                                                                                                                                                                                                                                                |
| 40 |                                                                                                                                                                                                                                                                                                                                                                                                                                                                                                                                                                                                                                                                                                                                                                                                                                                                                                                                                                                                                |
| 41 |                                                                                                                                                                                                                                                                                                                                                                                                                                                                                                                                                                                                                                                                                                                                                                                                                                                                                                                                                                                                                |
| 42 |                                                                                                                                                                                                                                                                                                                                                                                                                                                                                                                                                                                                                                                                                                                                                                                                                                                                                                                                                                                                                |
| 43 |                                                                                                                                                                                                                                                                                                                                                                                                                                                                                                                                                                                                                                                                                                                                                                                                                                                                                                                                                                                                                |
| 44 |                                                                                                                                                                                                                                                                                                                                                                                                                                                                                                                                                                                                                                                                                                                                                                                                                                                                                                                                                                                                                |
| 45 |                                                                                                                                                                                                                                                                                                                                                                                                                                                                                                                                                                                                                                                                                                                                                                                                                                                                                                                                                                                                                |
| 46 |                                                                                                                                                                                                                                                                                                                                                                                                                                                                                                                                                                                                                                                                                                                                                                                                                                                                                                                                                                                                                |
| 47 |                                                                                                                                                                                                                                                                                                                                                                                                                                                                                                                                                                                                                                                                                                                                                                                                                                                                                                                                                                                                                |
| 48 |                                                                                                                                                                                                                                                                                                                                                                                                                                                                                                                                                                                                                                                                                                                                                                                                                                                                                                                                                                                                                |
| 49 |                                                                                                                                                                                                                                                                                                                                                                                                                                                                                                                                                                                                                                                                                                                                                                                                                                                                                                                                                                                                                |
| 50 |                                                                                                                                                                                                                                                                                                                                                                                                                                                                                                                                                                                                                                                                                                                                                                                                                                                                                                                                                                                                                |
| 51 |                                                                                                                                                                                                                                                                                                                                                                                                                                                                                                                                                                                                                                                                                                                                                                                                                                                                                                                                                                                                                |
| 52 |                                                                                                                                                                                                                                                                                                                                                                                                                                                                                                                                                                                                                                                                                                                                                                                                                                                                                                                                                                                                                |
| 53 |                                                                                                                                                                                                                                                                                                                                                                                                                                                                                                                                                                                                                                                                                                                                                                                                                                                                                                                                                                                                                |
| 54 |                                                                                                                                                                                                                                                                                                                                                                                                                                                                                                                                                                                                                                                                                                                                                                                                                                                                                                                                                                                                                |
| 55 |                                                                                                                                                                                                                                                                                                                                                                                                                                                                                                                                                                                                                                                                                                                                                                                                                                                                                                                                                                                                                |
| 56 |                                                                                                                                                                                                                                                                                                                                                                                                                                                                                                                                                                                                                                                                                                                                                                                                                                                                                                                                                                                                                |
| 57 |                                                                                                                                                                                                                                                                                                                                                                                                                                                                                                                                                                                                                                                                                                                                                                                                                                                                                                                                                                                                                |
| 58 |                                                                                                                                                                                                                                                                                                                                                                                                                                                                                                                                                                                                                                                                                                                                                                                                                                                                                                                                                                                                                |
| 59 |                                                                                                                                                                                                                                                                                                                                                                                                                                                                                                                                                                                                                                                                                                                                                                                                                                                                                                                                                                                                                |
| 60 |                                                                                                                                                                                                                                                                                                                                                                                                                                                                                                                                                                                                                                                                                                                                                                                                                                                                                                                                                                                                                |
| 61 | (a-methapred or artisona or besonia or dopomedrol or esametone or firmacort or lemod or medesone or medixon or medlone or medrate or m-predrol or medrol or medrone or mesopren or metastab or methyleneprednisolone or methylprednisolon* or metilbetasone or metilprednisolon* or metrisone or metrocort or moderin or nipypan or noretona or predni-n or prednisolone or prednol or promacortine or reactonol or sieropresol or solomet or solumedrol or summicort or suprametil or urbason* or wyacort).mp.                                                                                                                                                                                                                                                                                                                                                                                                                                                                                                |
| 62 | (acetaminophen or paracetamol or tylenol).mp.                                                                                                                                                                                                                                                                                                                                                                                                                                                                                                                                                                                                                                                                                                                                                                                                                                                                                                                                                                  |
| 63 | (acetylsalicylic-acid or aspirin).mp.                                                                                                                                                                                                                                                                                                                                                                                                                                                                                                                                                                                                                                                                                                                                                                                                                                                                                                                                                                          |
| 64 | (accufix or aroseb-dex or ciprodex or cresophene or decaderm or decadron or decaspray or dexacen or dexacort or dexair or dexamethasone or dexasone or dexasporin or dexone or dexycu or encor-dec or endomethasone or hexadrol or maxidex or maxitrol or neodecadron or neomycin or ozurdex or septomixine or tobradex or tobramycin).mp.                                                                                                                                                                                                                                                                                                                                                                                                                                                                                                                                                                                                                                                                     |
| 65 | (adasone or antocortone or betapar or bicortone or cartancyl or colisone or cortan or cortidelt or cotone or dacorten or dacortin or decortisyl or dellacort or delta-cortelan or delta-cortisone or deldadome or delta-e or delta-some or deltacordene or deltacortisone or deltacortone or deltasone or deltison* or deltra or di-adreson or diadreson or econosone or encorton* or fernisone or fiasone or hostacortin or in-sone or incocortyl or juvason or lisacort or lodotra or lodtra or me-korti or metacortandracin or meticorten or metreton or nisona or nizon or novoprednisone or nurison or orasone or panafcort or panasol or paracort or parmenison or pehacort or preddeltin or prednicen or prednicorm or prednicort or prednicot or prednidib or prednilonga or prednison* or prednitone or prednizon or prednovister or presone or pronison or rayos or rectodelt or retrocortine or servisone or sone or sterapred or supercortil or ultracorten* or winpred or wojtab or zenadrid).mp. |
| 66 | (addaprin or advil or caldolor or dyspel or europofen or genpril or i-prin or IBU-200 or ibuprofen or motrin or neoProfen or novo-profen or provil).mp.                                                                                                                                                                                                                                                                                                                                                                                                                                                                                                                                                                                                                                                                                                                                                                                                                                                        |
| 67 | (adepril or amavil or amilit or amineurin or amiplin or amiprin or amitid or amitril or amitrip or amitriptyline or amyline or amyrole or anapsique or annoylin or apo-peram or belpax or damilenehydrochloride or daprimen or deprex or domical or elatrol or elatrolet or elavil or enafon or endep or etrafon or etravil or kyliran or laroxyl or larozyl or lentizol or levate or levazine or limbitrol or maxivalet or miketorin or mitaptyline or normaln or novoprotect or novitriptyn or oasil-m or pinsanu or pinsaun or proavil or rantoron or redomex or saroten or sarotena or syneudon or teperin or                                                                                                                                                                                                                                                                                                                                                                                              |

|    |                                                                                                                                                                                                                                                                                                                                                                                                                                                                                                                                                                                                                                                                                                                                                                                                                                                                                                                                                                                                                                                                                                                                                                                                                                                                                                                                                      |
|----|------------------------------------------------------------------------------------------------------------------------------------------------------------------------------------------------------------------------------------------------------------------------------------------------------------------------------------------------------------------------------------------------------------------------------------------------------------------------------------------------------------------------------------------------------------------------------------------------------------------------------------------------------------------------------------------------------------------------------------------------------------------------------------------------------------------------------------------------------------------------------------------------------------------------------------------------------------------------------------------------------------------------------------------------------------------------------------------------------------------------------------------------------------------------------------------------------------------------------------------------------------------------------------------------------------------------------------------------------|
|    | trepiline or triavil or tridep or tripta or triptizol or triptyn or trynol or tryptacap-hydrochloride or tryptine or tryptizol or trytomer or vanatrip).mp.                                                                                                                                                                                                                                                                                                                                                                                                                                                                                                                                                                                                                                                                                                                                                                                                                                                                                                                                                                                                                                                                                                                                                                                          |
| 68 | (aleve or anaprox or flanax or maxidol or mediproxen or naprelan or naprosyn or naproxen).mp.                                                                                                                                                                                                                                                                                                                                                                                                                                                                                                                                                                                                                                                                                                                                                                                                                                                                                                                                                                                                                                                                                                                                                                                                                                                        |
| 69 | (aleviatin or auranile or causoin or cerebyx or comitoina or convul or danten or dantinal or dantoinal or dantoine or denyl or di-hydan or di-lan or di-phetine or difenilhidantoina or difenin or difetoin or difhydan or dihycon or dihydantoin or dilabid or dilantin* or dillantoin or dintoin or dintoina or diphantoin or diphedal or diphedan or diphenin or diphenine or diphentyn or diphenylan or dyphenylhydantoin* or diphenylhydantoin or ditoinate or ekko or elepsindon or enkelfel or epamin or epdantoin or epelin or epifenyl or epihydan or epilan-d or epilantin or epinat or epised or eptal or fenantoin or fenidantoin or fenitoina or fentoin or fenylepsin or fenytoin* or fosphenytoin-sodium or hidan or hidantal or hidantilo or hidantina or hidantomin or hydantal or hydantoinal or ictalis-simple or idantoil or iphenylhydantoin or kessodanten or labopal or lehydan or leptoain or lepsin or mesantoin or minetoin or neosidantoina or novantoina or novophenytain or oxytan or phanantoin or phanatine or phenatine or phenatoina or phenhydantin or phentoin or phentytoin or phenytek or phenytek or phenytoin* or ritmenal or saceril or sanepil or silantin or sinergina or sodanthon or sodantoin or sodanton or solantin or sylantoina or thilophenyl or toin or tremytoine or zentropal or zentropil).mp. |
| 70 | (alganex or liman or mobiflex or octiveran or rexalgan or tenoxicam* or tilcotil).mp.                                                                                                                                                                                                                                                                                                                                                                                                                                                                                                                                                                                                                                                                                                                                                                                                                                                                                                                                                                                                                                                                                                                                                                                                                                                                |
| 71 | (algimabo or algirona or algopyrin or alnex or analgin or analgina or analgine or antalgine or antalgina or causalon or conmel or cornalgin or defin or di-shuang or dialgin or diprin or dolanet or dolemicin or dolgan or dolocalma or foragin or hexalgin or laper or magnopyrol or metamizol* or metazol or minalgin or natralgin or nolotil or novalcina or novalgin or novalgina or novalgine or novalgine or optalgin or proalgin or promel or sinalgia or taxenil or telalgin or v-dalgin).mp.                                                                                                                                                                                                                                                                                                                                                                                                                                                                                                                                                                                                                                                                                                                                                                                                                                               |
| 72 | (alphatrex or beta-val or betacort or betaderm or betagel or betaject or betamethasone or betamycin or betaprolene or betaprone or betatrex or beteflam or betnesol or betnovate or celestone or celestoderm or dermabet or diprogen or diprolene or diprosalic or diprosone or dovobet or ectosone or enstilar or lotriderm or lotrisone or luxiq or prevex-b or pro-sone or sernivo or taclonex or uticort or valisone or valnac).mp.                                                                                                                                                                                                                                                                                                                                                                                                                                                                                                                                                                                                                                                                                                                                                                                                                                                                                                              |
| 73 | (amizepin* or bipotrol or biston or carbamazepin* or carbamazepin* or carbatrol or carbazepin* or carnexiv or epitol or equetro or finlepsin or karbamazepin or neurotol or stazepine or tegretal or tegretol or telesmin or teril or timonil).mp.                                                                                                                                                                                                                                                                                                                                                                                                                                                                                                                                                                                                                                                                                                                                                                                                                                                                                                                                                                                                                                                                                                   |
| 74 | (amrix or cyclobenzaprin* or fexmid or flexeril or lissiril or proeptatriene or proheptatrien*).mp.                                                                                                                                                                                                                                                                                                                                                                                                                                                                                                                                                                                                                                                                                                                                                                                                                                                                                                                                                                                                                                                                                                                                                                                                                                                  |
| 75 | (anti-inflammatory-analges* or antiinflammatory-analges*).tw,kf.                                                                                                                                                                                                                                                                                                                                                                                                                                                                                                                                                                                                                                                                                                                                                                                                                                                                                                                                                                                                                                                                                                                                                                                                                                                                                     |
| 76 | (arcoxia or etoricoxib* or etoxib or etropain or kingcox or tauxib or torcoxia).mp.                                                                                                                                                                                                                                                                                                                                                                                                                                                                                                                                                                                                                                                                                                                                                                                                                                                                                                                                                                                                                                                                                                                                                                                                                                                                  |
| 77 | (aricclaim or cymbalta or duloxetine or xeristar or yentreve).mp.                                                                                                                                                                                                                                                                                                                                                                                                                                                                                                                                                                                                                                                                                                                                                                                                                                                                                                                                                                                                                                                                                                                                                                                                                                                                                    |
| 78 | (aristospan or kenalog or triamcinolone or zilretta).mp.                                                                                                                                                                                                                                                                                                                                                                                                                                                                                                                                                                                                                                                                                                                                                                                                                                                                                                                                                                                                                                                                                                                                                                                                                                                                                             |
| 79 | (arthaxan or balmox or consolan or dolsinal or flambate or listran or mebutan or nabumeton* or prodac or relafen or relief or relifen or reliefex or unimetone).mp.                                                                                                                                                                                                                                                                                                                                                                                                                                                                                                                                                                                                                                                                                                                                                                                                                                                                                                                                                                                                                                                                                                                                                                                  |
| 80 | (arthrotec or diclofenac or dyloject or flector or pennsaid or solaraze or voltaren or zipsor or zorvolex).mp.                                                                                                                                                                                                                                                                                                                                                                                                                                                                                                                                                                                                                                                                                                                                                                                                                                                                                                                                                                                                                                                                                                                                                                                                                                       |
| 81 | (ateven or avantyl or aventyl or demethylamitriptyline or demethylamitriptyline or desitriptilina or desmethylamitriptyline or lumbeck or noramitriptyline or noritren or nortroptilina or nortriptylin* or nortriptylin* or nortriptylin* or norventyl or pamelor or sensaval).mp.                                                                                                                                                                                                                                                                                                                                                                                                                                                                                                                                                                                                                                                                                                                                                                                                                                                                                                                                                                                                                                                                  |
| 82 | (avetil or axacet or axisal or axum or delaxin or etroflex or forbaxin or lumirelax or methocal or methocarbamol* or methoxacet or methoxisal or metocarbamol* or metofenia or miolaxene or miorilas or miowas or myolaxene or neuraxin or parabaxin or perilax or reflexyn or relaxophen or relestrif or robax or robaxacet or robaximol or robaxin or robaxisal or robinax or romethocarb or spasmhalt or surquetil or tresortil).mp.                                                                                                                                                                                                                                                                                                                                                                                                                                                                                                                                                                                                                                                                                                                                                                                                                                                                                                              |
| 83 | (baclofen* or gablofen* or kemstro or lioresal).mp.                                                                                                                                                                                                                                                                                                                                                                                                                                                                                                                                                                                                                                                                                                                                                                                                                                                                                                                                                                                                                                                                                                                                                                                                                                                                                                  |
| 84 | (bupivacaine or exparel or marcaine or sensorcaine or vivacaine).mp.                                                                                                                                                                                                                                                                                                                                                                                                                                                                                                                                                                                                                                                                                                                                                                                                                                                                                                                                                                                                                                                                                                                                                                                                                                                                                 |
| 85 | (carbocaine or mepivacaine or polocaine or scandonest).mp.                                                                                                                                                                                                                                                                                                                                                                                                                                                                                                                                                                                                                                                                                                                                                                                                                                                                                                                                                                                                                                                                                                                                                                                                                                                                                           |

|    |                                                                                                                                                                                 |
|----|---------------------------------------------------------------------------------------------------------------------------------------------------------------------------------|
| 1  |                                                                                                                                                                                 |
| 2  | 86 (catapres or clonidine or clorpres or duraclon or kapvay).mp.                                                                                                                |
| 3  | 87 (celebrex or celecox*).mp.                                                                                                                                                   |
| 4  | 88 (chlorprocaine or procaine).mp.                                                                                                                                              |
| 5  | 89 (corticoid* or corticosteroid* or cortico-steroid*).tw,kf.                                                                                                                   |
| 6  | 90 (coxflam or coxicam or maxicam or melfax or melonex or meloxicam* or meloxivet or metacam or mobec or mobic or mobicox or movalis or movatec or revmoksikam or vivlodex).mp. |
| 7  | 91 (daypro or deflam or oxaprozin*).mp.                                                                                                                                         |
| 8  | 92 (demethylimipramine or desimipramine or desipramin* or desmethylimipramine or dezipramine or dimethylimipramine or norimipramine or norpramin or pertofrane).mp.             |
| 9  | 93 (desvenlafaxine or effexor or elafax or khedezla or pristiq or venlafaxin*).mp.                                                                                              |
| 10 | 94 (dexmedetomidine or precedex).mp.                                                                                                                                            |
| 11 | 95 diflunisal.mp.                                                                                                                                                               |
| 12 | 96 (epitomax or qsymia or qudexy or tipiramat* or topamax or topax or topiragen or topiramat* or trokendi).mp.                                                                  |
| 13 | 97 (feldene or piroxicam).mp.                                                                                                                                                   |
| 14 | 98 (fenoprofen or nalfon).mp.                                                                                                                                                   |
| 15 | 99 flurbiprofen.mp.                                                                                                                                                             |
| 16 | 100 (frotek or ketoprofen).mp.                                                                                                                                                  |
| 17 | 101 (gabapentin* or gralise or horizant or neurontin).mp.                                                                                                                       |
| 18 | 102 (gabatril or gabitril or tiagabine).mp.                                                                                                                                     |
| 19 | 103 (indocin or indomethacin or novo-methacin or pro-indo or tivorbex).mp.                                                                                                      |
| 20 | 104 (ketalar or ketamine).mp.                                                                                                                                                   |
| 21 | 105 (lidocaine or xylocaine or xylocard).mp.                                                                                                                                    |
| 22 | 106 (local-infiltration adj2 analgesia).tw,kf.                                                                                                                                  |
| 23 | 107 (lumiracoxib or prexige).mp.                                                                                                                                                |
| 24 | 108 (lyrica or pregabalin).mp.                                                                                                                                                  |
| 25 | 109 (mefenamic-acid or ponstan or ponstel).mp.                                                                                                                                  |
| 26 | 110 (metassalone or metaxalon* or skelaxin or zorane).mp.                                                                                                                       |
| 27 | 111 (narcotic*-free or narcotic*-less or narcotic*-spar* or non-narcotic* or non-opioid*).tw,kf.                                                                                |
| 28 | 112 (narop or naropin or noropine or ropivacain*).mp.                                                                                                                           |
| 29 | 113 (nonsteroidal-antiinflammatory or nonsteroidal-anti-inflammatory or non-steroidal-antiinflammatory or non-steroidal-anti-inflammatory or nsaid*).tw,kf.                     |
| 30 | 114 (opiat*-free or opiat*-less or opiat*-spar* or opioid*-free or opioid*-less or opioid*-spar*).tw,kf.                                                                        |
| 31 | 115 (oxcarbazepin* or oxtellar or timox or trileptal).mp.                                                                                                                       |
| 32 | 116 parecoxib.mp.                                                                                                                                                               |
| 33 | 117 (prialt or ziconotide).mp.                                                                                                                                                  |
| 34 | 118 (sirdalud or ternelin or tizanidin* or zanaflex).mp.                                                                                                                        |
| 35 | 119 or/10-118                                                                                                                                                                   |
| 36 | 120 9 and 119                                                                                                                                                                   |
| 37 | 121 Alfentanil/                                                                                                                                                                 |
| 38 | 122 exp Analgesics, Opioid/                                                                                                                                                     |
| 39 | 123 Buprenorphine/                                                                                                                                                              |
| 40 | 124 Butorphanol/                                                                                                                                                                |
| 41 | 125 Codeine/                                                                                                                                                                    |
| 42 | 126 Dextropropoxyphene/                                                                                                                                                         |
| 43 | 127 Fentanyl/                                                                                                                                                                   |
| 44 |                                                                                                                                                                                 |
| 45 |                                                                                                                                                                                 |
| 46 |                                                                                                                                                                                 |
| 47 |                                                                                                                                                                                 |
| 48 |                                                                                                                                                                                 |
| 49 |                                                                                                                                                                                 |
| 50 |                                                                                                                                                                                 |
| 51 |                                                                                                                                                                                 |
| 52 |                                                                                                                                                                                 |
| 53 |                                                                                                                                                                                 |
| 54 |                                                                                                                                                                                 |
| 55 |                                                                                                                                                                                 |
| 56 |                                                                                                                                                                                 |
| 57 |                                                                                                                                                                                 |
| 58 |                                                                                                                                                                                 |
| 59 |                                                                                                                                                                                 |
| 60 |                                                                                                                                                                                 |

|     |                                                                                                                                                                                                                                                                                                                                                                                                                                                                                                                                                                                                                                                                                                                                                                                                                                                                                                                                                                                                                                                                                                                                                   |
|-----|---------------------------------------------------------------------------------------------------------------------------------------------------------------------------------------------------------------------------------------------------------------------------------------------------------------------------------------------------------------------------------------------------------------------------------------------------------------------------------------------------------------------------------------------------------------------------------------------------------------------------------------------------------------------------------------------------------------------------------------------------------------------------------------------------------------------------------------------------------------------------------------------------------------------------------------------------------------------------------------------------------------------------------------------------------------------------------------------------------------------------------------------------|
| 128 | Hydrocodone/                                                                                                                                                                                                                                                                                                                                                                                                                                                                                                                                                                                                                                                                                                                                                                                                                                                                                                                                                                                                                                                                                                                                      |
| 129 | Hydromorphone/                                                                                                                                                                                                                                                                                                                                                                                                                                                                                                                                                                                                                                                                                                                                                                                                                                                                                                                                                                                                                                                                                                                                    |
| 130 | Meperidine/                                                                                                                                                                                                                                                                                                                                                                                                                                                                                                                                                                                                                                                                                                                                                                                                                                                                                                                                                                                                                                                                                                                                       |
| 131 | Methadone/                                                                                                                                                                                                                                                                                                                                                                                                                                                                                                                                                                                                                                                                                                                                                                                                                                                                                                                                                                                                                                                                                                                                        |
| 132 | Morphine/                                                                                                                                                                                                                                                                                                                                                                                                                                                                                                                                                                                                                                                                                                                                                                                                                                                                                                                                                                                                                                                                                                                                         |
| 133 | Morphine Derivatives/                                                                                                                                                                                                                                                                                                                                                                                                                                                                                                                                                                                                                                                                                                                                                                                                                                                                                                                                                                                                                                                                                                                             |
| 134 | Nalbuphine/                                                                                                                                                                                                                                                                                                                                                                                                                                                                                                                                                                                                                                                                                                                                                                                                                                                                                                                                                                                                                                                                                                                                       |
| 135 | Oxycodone/                                                                                                                                                                                                                                                                                                                                                                                                                                                                                                                                                                                                                                                                                                                                                                                                                                                                                                                                                                                                                                                                                                                                        |
| 136 | Pentazocine/                                                                                                                                                                                                                                                                                                                                                                                                                                                                                                                                                                                                                                                                                                                                                                                                                                                                                                                                                                                                                                                                                                                                      |
| 137 | Pirinitramide/                                                                                                                                                                                                                                                                                                                                                                                                                                                                                                                                                                                                                                                                                                                                                                                                                                                                                                                                                                                                                                                                                                                                    |
| 138 | Remifentanil/                                                                                                                                                                                                                                                                                                                                                                                                                                                                                                                                                                                                                                                                                                                                                                                                                                                                                                                                                                                                                                                                                                                                     |
| 139 | Sufentanil/                                                                                                                                                                                                                                                                                                                                                                                                                                                                                                                                                                                                                                                                                                                                                                                                                                                                                                                                                                                                                                                                                                                                       |
| 140 | Tramadol/                                                                                                                                                                                                                                                                                                                                                                                                                                                                                                                                                                                                                                                                                                                                                                                                                                                                                                                                                                                                                                                                                                                                         |
| 141 | (Abalgin or Adalgin or Algafan or Algaphan or Algodin or Antalvic or Daloxen or Darvocet or Darvon or Deprancol or Deprandol or Depromic or Depronol or Destropropossifene or Develin or Dextropropoxifeno or Dextropropoxyphen* or Dextroproxifeno or Dimeprotane-hydrochloride or Dolan or Dolene or Dolorphe or Doloxene or Doloxyne or Femadol or Kesso-gesic or Levitan or Leviton or Liberan or Piril or Pro-gesic or Prophene-65 or Propoxyphen* or Propoxyphine or Proxagesic or Proxyvon or Regredol or Tawasan).mp.                                                                                                                                                                                                                                                                                                                                                                                                                                                                                                                                                                                                                     |
| 142 | (Abstral or Actiq or Duragesic or Durogesic or Durotep or Epufen or Fentalis or Fentamyl or Fentane* or Fentanil* or Fentanyl* or Fentora or Innovar or Instanyl or Ionsys or Lazanda or Leptanal or Matrifen or Mezolar or Onsolis or PecFent or Phentanyl or Rapinyl or Recuvyra or Sentonil or Sublimase or Sublimaze or Subsys or Tanyl or Transfenta).mp.                                                                                                                                                                                                                                                                                                                                                                                                                                                                                                                                                                                                                                                                                                                                                                                    |
| 143 | (Acetazone or Ambenyl or Ardinex or Atasol or Bromanyl or Calmylin or Codein* or Codeprex or Codicaps or Codipertussin or Codrix or Codyl or Cotridin or Isocodeine or Mersyndol or Methyilmorfine or Methyilmorphine or Procet or Robaxacet or Robaxisal or Synalgos or Trezix or Trianal or Triatec).mp.                                                                                                                                                                                                                                                                                                                                                                                                                                                                                                                                                                                                                                                                                                                                                                                                                                        |
| 144 | (Actiskenan or Algedol or Anafil or Arymo or Astramorph or Avinza or Contalgin or Depodur or Depomorphine or Dolcontin or Doloral or Duralmor or Duramorph or Embeda or Ethirfin or Graten or Infumorph or Kadian or Kapanol or Longphine or M-Ediat or Meslon or M-Eslon or Mitigo or Moraxen or Morcontin or Morficontin or Morphabond or Morphanton or Morphgesic or Morphia or Morphine* or Moscontin or MS-Contin or M-S-Contin or Noceptin or Oblioser or Oramorph or Rapi-ject or Relimal or Roxanol or Rylomine or Sevredol or Skenan or S-morphine or Statex or Vendal or Zomorph).mp.                                                                                                                                                                                                                                                                                                                                                                                                                                                                                                                                                   |
| 145 | (Adamon or Adolonta or Amadol or Analab or Analdol or Andalpa or Bellatram or Biodalgic or Biokanol or Biomadol or Calmol or Contramid or Contramal or Con-zip or Conzip or Dolana or Dolika or Dolmal or Dolotral or Dolzam or Dromadol or Durela or Eufindol or Exopen or Jutadol or Katrasic or Kontram or Labesfal or Mabron or Melanate or Mosepan or Newdorphan or Nobligan or Nonalges or Omnidol or Pengesic or Prontofort or Radol or Ralivia or Ranitidin or Rofy or Rybix or Ryzolt or Sefimal or Sensitram or Takadol or Tamolan or Tandol or Tarol or Theradol or Tiparol or Tiral or Topalgic or Trabar or Trabilan or Trabilin or Tradol* or Tradona or Tralgiol or Tralic or Tramabeta or Tramacet or Tramada or Tramadox or Trama-dorsch or Tramadi* or Tramado* or Tramadura or Tramagetic or Tramagit or Tramahexal or Tramake or Tramal or Tramaliv or Tramazac or Tramed or Tramex or Tramol or Tramundin or Trapidol or Trasedal or Trasik or Trexol or Tridol or Tridural or Trodon or Trondon or Ultracet or Ultram or Unitral or Urgendol or Zamadol or Zamudol or Zodal or Zumalgic or Zumatran or Zydol or Zytram).mp. |
| 146 | (Adanon or Algidon or Algolysin or Algovetin or Algoxale or Althose or Amidon* or Amidosan or Anadon or Biodone or Butalgin or Cophylac or Deamin or Depridol or Diaminon or Dianone or Dolafin or Dolamid or Dolesone or Dolmed or Dolophin* or Dorex or Dorexol or Eptadone or Fenadon or Gobbidona or Heptadon* or Heptanon or Ketalgin or Mecodin or Mepecton or                                                                                                                                                                                                                                                                                                                                                                                                                                                                                                                                                                                                                                                                                                                                                                              |



|     |                                                                                                                                                                                                                                                                                                                                                                                                                                                                                                                                                                                                                                                                                                                                                                                                                                                                                                                                                                                                                                                                                                                                                                                                                                      |
|-----|--------------------------------------------------------------------------------------------------------------------------------------------------------------------------------------------------------------------------------------------------------------------------------------------------------------------------------------------------------------------------------------------------------------------------------------------------------------------------------------------------------------------------------------------------------------------------------------------------------------------------------------------------------------------------------------------------------------------------------------------------------------------------------------------------------------------------------------------------------------------------------------------------------------------------------------------------------------------------------------------------------------------------------------------------------------------------------------------------------------------------------------------------------------------------------------------------------------------------------------|
|     | Mephenon or Metadol or Metadon* or Metasedin or Methaddict or Methadon* or Methadose or Methaforte mix or Miadone or Moheptan or Pallidone or Phenadon* or Physepton* or Polamidon or Polamivet or Polamivit or Sedo-Rapide or Sinalgin or Symoron or Westadone).mp.                                                                                                                                                                                                                                                                                                                                                                                                                                                                                                                                                                                                                                                                                                                                                                                                                                                                                                                                                                 |
| 147 | (Allay or Anexsia or Apadaz or Azdone or Bancap or Bekadid or Codamine or Codinovo or CO-GESIC or Dico or Dicodid or Dihydrocodeinone or Dihydrocodone or Duradyne-DHC or Flowtuss or Hidrocodona or Hycodan or Hycofenix or Hycon or Hydrocodeinonebitartrate or Hydrocodon* or Hydrocon* or Hydropane or Hy-Phen or Hysingla or Idrocodone or Lorcet-HD or Lortab or Multacodin or Norcet or Norco or Obredon or Reprexain or Rezira or Robidone or Tussicaps or Tussignon or Tussionex or Tycolet or Vantrela-ER or Vicodin or Vicoprin or Vicoprofen or Vituz or Xtrelus or Zohydro or Zutripro or Zydone).mp.                                                                                                                                                                                                                                                                                                                                                                                                                                                                                                                                                                                                                   |
| 148 | (Alfenil or Alfenta or Alfentanil* or Alfentanyl or Brevafen or Fanaxal or Limifen or Rapifen).mp.                                                                                                                                                                                                                                                                                                                                                                                                                                                                                                                                                                                                                                                                                                                                                                                                                                                                                                                                                                                                                                                                                                                                   |
| 149 | (Algil or Alodan or Atropine or Centralgin* or Cluyer or Demero* or Dispadol or Dolanquifa or Dolantal or Dolantin* or Dolargan or Dolcontral or Dolestin* or Dolin or Dolocontral or Doloneurin or Doloneutrotat or Dolosal or Dolosan or Dolsin or Dolvanol or Endolate or Isonipeccain* or Lidol or Lydol or Mefedina or Mepadin or Meperdol or Mepergan or Meperiden or Meperidin* or Meperidol or Mephedine or Mepiridine or Mialgin or Nemerol or Neomochin or Operidine or Opistan or Pantalgin or Petadin or Petantin* or Pethanol or Pethedine or Pethidin* or Petidin* or Petydyna or Phetidine or Pipersal or Piridosal or Sauteralgyl or Supplosal or Synlaudine).mp.                                                                                                                                                                                                                                                                                                                                                                                                                                                                                                                                                    |
| 150 | (Anorfin or Belbuca or Bunavail or Buprenex or Buprenorfin* or Buprenorphin* or Buprex or Buprine or Butrans or Cassipa or Finibron or Norphin or Pentorel or Prefin or Probuphenine or Probuphine or Somnena or Sublocade or Suboxone or Subutex or Temgesic or Transtec or Vetergesic or Zubsolv).mp.                                                                                                                                                                                                                                                                                                                                                                                                                                                                                                                                                                                                                                                                                                                                                                                                                                                                                                                              |
| 151 | (Avridi or Bionine or Bionone or Bolodorm or Broncodal or Bucodal or Cafacodal or Cardanon or Codeinone or Codenon or Codix-5 or Codoxy or Combunox or Dihydrohydroxycodoneinone or Dihydrohydroxydodeinone or Dihydrone or Dihydroxycodoneinone or Dinarkon or Diphydrone or Endine or Endone or Eubine or Eucodal* or Eudin or Eukdin or Eukodal or Eumorphal or Eurodamine or Eutagen or Hydrocodal or Hydroxycodoneinone* or Ludonal or Medicodal or M-oxy or Narcobasin* or Narcosin or Nargenol or Narodal or Nucodan or Opton or Ossicodone or Oxanest or Oxaydo or Oxecta or Oxiconona or Oxicon or Oxicone or Oxicontin or Oxiconum or Oxikon or Oxy-ir or Oxycet or Oxycocet or Oxycod or Oxycodan or Oxycodoneinone* or Oxycodon* or Oxycodyl or Oxycone or Oxycontin or Oxydose or Oxyfast or Oxygesic or OxyIR or Oxykon or OxyNEO or Oxynorm or Pancodine or Pancodone or Pavinal or Percobarb or Percocet or Percodan or Percolone or Pronarcin or Remoxy or Roxicet or Roxicodone or Roxilox or Roxiprin or Roxybond or Roxycodone or Sinthiodal or Stupenal or Suspendol or Supeudol or Targin or Targiniq or Tebodal or Tekodin or Thecodin or Theocodin or Troxyca or Tylox or Xartemis or Xtampa or Xtampza).mp. |
| 152 | (Beforal or Butorfanol or Butorphanol or Butorphanolum or Dolorex or Moradol or Stadol).mp.                                                                                                                                                                                                                                                                                                                                                                                                                                                                                                                                                                                                                                                                                                                                                                                                                                                                                                                                                                                                                                                                                                                                          |
| 153 | (Biomorphyl or Cofalaudid or Dihydromorfinon or Dihydromorfinone or Dihydromorphone or Dilaudid or DiMo or Dimorphone or Dolonovag or Exalgo or Hidromorfona or Hydral or Hydromorfona or Hydromorph-Contin or Hydromorfinone-hydrochloride or Hydromorphon* or Hydrostat-ir or Hymorphan or Idromorfone or Jurnista or Laudacon* or Novolaudon or Opidol or Paliadon or Palladon* or Rexaphon or Semcox or Sophidone).mp.                                                                                                                                                                                                                                                                                                                                                                                                                                                                                                                                                                                                                                                                                                                                                                                                           |
| 154 | (Chronogesic or DSUVIA or Fentathianyl or Fentathienyl or Fentatienil or Sufenta or Sufentanil* or Sufentanyl).mp.                                                                                                                                                                                                                                                                                                                                                                                                                                                                                                                                                                                                                                                                                                                                                                                                                                                                                                                                                                                                                                                                                                                   |
| 155 | (Dipidolor or Dipirtramide or Dipydolor or Piridolan or Pirinitramide or Piritramid* or Pyritramide).mp.                                                                                                                                                                                                                                                                                                                                                                                                                                                                                                                                                                                                                                                                                                                                                                                                                                                                                                                                                                                                                                                                                                                             |
| 156 | (Dolapent or Fortal or Fortalgescic or Fortalin or Fortral or Fortraline or Fortwin or Lexir or Liticon or Peltazon or Pentacozine or Pentafen or Pentagin or Pentalgina or Pentazocin* or Pentozocine or Perutagin or Sosegon or Sosigon or TALACEN or Talioin or Talwin).mp.                                                                                                                                                                                                                                                                                                                                                                                                                                                                                                                                                                                                                                                                                                                                                                                                                                                                                                                                                       |
| 157 | (Nalbufin* or Nalbuphin* or Nalcryn or Nalpain or Nubain* or Onfor).mp.                                                                                                                                                                                                                                                                                                                                                                                                                                                                                                                                                                                                                                                                                                                                                                                                                                                                                                                                                                                                                                                                                                                                                              |
| 158 | (Nicomorfin* or Nicomorphin* or Vilan).mp.                                                                                                                                                                                                                                                                                                                                                                                                                                                                                                                                                                                                                                                                                                                                                                                                                                                                                                                                                                                                                                                                                                                                                                                           |

|     |                                                                                                                                                                                                                                                                                                        |
|-----|--------------------------------------------------------------------------------------------------------------------------------------------------------------------------------------------------------------------------------------------------------------------------------------------------------|
| 159 | (Remifentanil or Remifentanyl or Ultiva).mp.                                                                                                                                                                                                                                                           |
| 160 | or/121-159                                                                                                                                                                                                                                                                                             |
| 161 | 120 and 160                                                                                                                                                                                                                                                                                            |
| 162 | Animals/ not (Animals/ and Humans/)                                                                                                                                                                                                                                                                    |
| 163 | Disease models, animal/ or Models, animal/                                                                                                                                                                                                                                                             |
| 164 | ((animal or animals or canine* or cat or cats or dog or dogs or feline or hamster* or lamb or lambs or mice or monkey or monkeys or mouse or murine or pig or pigs or piglet* or porcine or primate* or rabbit* or rats or rat or rodent* or sheep* or veterinar*) not (human* or patient*)).ti,kf,jw. |
| 165 | or/162-164                                                                                                                                                                                                                                                                                             |
| 166 | 161 not 165                                                                                                                                                                                                                                                                                            |
| 167 | (exp child/ or exp infant/) not (adolescent/ or exp adult/)                                                                                                                                                                                                                                            |
| 168 | (baby or babies or boy* or child* or fetus or fetal or foet* or girl* or juvenile* or kid or kids or infan* or newborn* or new-born* or neonat* or neo-nat* or paediatr* or pediater* or preadolesc* or prepubesc* or preteen* or pubescen* or toddler* or youth*).ti,jw.                              |
| 169 | 167 or 168                                                                                                                                                                                                                                                                                             |
| 170 | 166 not 169                                                                                                                                                                                                                                                                                            |
| 171 | Clinical trials as topic/                                                                                                                                                                                                                                                                              |
| 172 | Controlled clinical trial/                                                                                                                                                                                                                                                                             |
| 173 | Randomized controlled trial/                                                                                                                                                                                                                                                                           |
| 174 | (placebo or randomized or randomly).tw.                                                                                                                                                                                                                                                                |
| 175 | trial.ti.                                                                                                                                                                                                                                                                                              |
| 176 | 171 or 172 or 173 or 174 or 175                                                                                                                                                                                                                                                                        |
| 177 | 170 and 176                                                                                                                                                                                                                                                                                            |

Following peer review, age filter was revised to retrieve articles from pediatric journals and studies including pediatric patients.

The queries at lines 167 and 168 of the original strategy were modified as follows:

**167** (exp child/ or exp infant/) not (adolescent/ or exp adult/)

**168** (baby or babies or boy\* or fetus or fetal or foet\* or girl\* or kid or kids or infan\* or newborn\* or new-born\* or neonat\* or neo-nat\* or preadolesc\* or prepubesc\* or preteen\* or pubescen\* or toddler\*).ti,jw.

## Supplement 2. Abstract screening decision tables

### I. Any Study

| Characteristics                                                                                                                                                               | Decision       |
|-------------------------------------------------------------------------------------------------------------------------------------------------------------------------------|----------------|
| Studies where the experimental design was <b>clearly</b> not a parallel randomized controlled trial (e.g. retrospective studies, historically controlled studies)             | <b>Exclude</b> |
| Narrative review (commentaries, letters and editorials), systematic reviews, meta analyses                                                                                    | <b>Exclude</b> |
| Did not assess interventions for postoperative pain management                                                                                                                | <b>Exclude</b> |
| Were conducted in animals                                                                                                                                                     | <b>Exclude</b> |
| Involved only pediatric patients                                                                                                                                              | <b>Exclude</b> |
| Analgesia regimens compared were <u>exclusively pre-operative</u> (e.g. preemptive gabapentin), with no indication that post-discharge analgesia was different between groups | <b>Exclude</b> |
| Analgesia regimens compared were <u>exclusively intra-operative</u> (e.g. nerve blocks), with no indication that post-discharge analgesia was different between groups        | <b>Exclude</b> |
| Analgesia regimen was offered <u>exclusively during hospital stay</u> (e.g. PCA, epidural), with no indication that post-discharge analgesia was different between groups     | <b>Exclude</b> |
| Involved analgesia treatment <u>exclusively for chronic postoperative pain</u> (i.e. the intervention started over 2 two months after surgery)                                | <b>Exclude</b> |

### II. Randomized trials involving post-discharge analgesia

| Primary analgesia regimen |                          |                                                                    | Rescue analgesia requiring a new prescription | Decision                |
|---------------------------|--------------------------|--------------------------------------------------------------------|-----------------------------------------------|-------------------------|
| Analgesia intervention 1  | Analgesia intervention 2 | Rescue analgesia readily available for patients (PRN prescription) |                                               |                         |
| Non-opioid (or placebo)   | Opioid                   | Non-opioid                                                         | Opioid OR Non-opioid OR Not used OR Unclear   | <b>Verify full-text</b> |
| Non-opioid (or placebo)   | Opioid                   | Not used                                                           | Opioid OR Non-opioid OR Not used OR Unclear   | <b>Verify full-text</b> |
| Non-opioid (or placebo)   | Opioid                   | Unclear                                                            | Opioid OR Non-opioid OR Not used OR Unclear   | <b>Verify full-text</b> |
| Non-opioid (or placebo)   | Opioid                   | Opioid                                                             | Opioid OR Non-opioid OR Not used OR Unclear   | <b>Exclude</b>          |
| Non-opioid                | Non-opioid (or placebo)  | Opioid OR Non-opioid OR Not used OR Unclear                        | Opioid OR Non-opioid OR Not used OR Unclear   | <b>Exclude</b>          |
| Opioid                    | Opioid                   | Opioid OR Non-opioid OR Not used OR Unclear                        | Opioid OR Non-opioid OR Not used OR Unclear   | <b>Exclude</b>          |

**Supplement 3. Data extraction form**

|                                                                                      |
|--------------------------------------------------------------------------------------|
| <b>A. STUDY IDENTIFICATION</b>                                                       |
| <b>STUDY DETAILS</b>                                                                 |
| <b>1. Sponsorship source:</b>                                                        |
| <b>2. Country:</b>                                                                   |
| <b>3. Setting:</b>                                                                   |
| <b>4. Comments:</b>                                                                  |
| <b>AUTHORS</b>                                                                       |
| <b>1. Author's name:</b>                                                             |
| <b>2. Institution:</b>                                                               |
| <b>3. Email:</b>                                                                     |
| <b>4. Address:</b>                                                                   |
| <b>ADDITIONAL INFORMATION</b>                                                        |
| <b>1. Article title:</b>                                                             |
| <b>2. Journal, year, volume, number and page:</b>                                    |
| <b>3. Key findings:</b>                                                              |
| <b>4. Publication source of study (peer reviewed or grey literature):</b>            |
| <b>5. Setting (university hospital, public hospital, private hospital database):</b> |
| <b>6. Study aim(s)/research question(s):</b>                                         |
| <b>7. Year of publication:</b>                                                       |

1  
2  
3  
4  
5  
6  
7  
8  
9  
10  
11  
12  
13  
14  
15  
16  
17  
18  
19  
20  
21  
22  
23  
24  
25  
26  
27  
28  
29  
30  
31  
32  
33  
34  
35  
36  
37  
38  
39  
40  
41  
42  
43  
44  
45  
46  
47  
48  
49  
50  
51  
52  
53  
54  
55  
56  
57  
58  
59  
60

|                                                                                                                                                                                                                                                                                                                     |
|---------------------------------------------------------------------------------------------------------------------------------------------------------------------------------------------------------------------------------------------------------------------------------------------------------------------|
| <b>B. METHODS</b>                                                                                                                                                                                                                                                                                                   |
| <ol style="list-style-type: none"> <li>1. Study design:</li> <li>2. Describe methodology briefly:</li> <li>3. Primary outcome:</li> <li>4. Secondary outcomes:</li> </ol>                                                                                                                                           |
| <b>C. POPULATION</b>                                                                                                                                                                                                                                                                                                |
| <b>INCLUSION/ EXCLUSION CRITERIA</b>                                                                                                                                                                                                                                                                                |
| <ol style="list-style-type: none"> <li>1. Inclusion criteria:</li> <li>2. Exclusion criteria:</li> <li>3. Group differences:</li> </ol>                                                                                                                                                                             |
| <b>ADDITIONAL POPULATION DATA</b>                                                                                                                                                                                                                                                                                   |
| <ol style="list-style-type: none"> <li>1. Describe the sample size calculation</li> <li>2. Were patients removed from the trial when they reported no improvement, no adherence to treatment and/or adverse events? (Yes/No)</li> <li>3. Was the study conducted in a single center or multiple centers?</li> </ol> |
| <b>PATIENT CHARACTERISTICS</b>                                                                                                                                                                                                                                                                                      |
| <ol style="list-style-type: none"> <li>1. Group label (e.g. opioid-free/based):</li> <li>2. Sample size:</li> <li>3. Number of patients randomized</li> <li>4. Number of patients analyzed</li> <li>5. Sex/gender (%F/%M):</li> </ol>                                                                               |

1  
2  
3  
4  
5  
6  
7  
8  
9  
10  
11  
12  
13  
14  
15  
16  
17  
18  
19  
20  
21  
22  
23  
24  
25  
26  
27  
28  
29  
30  
31  
32  
33  
34  
35  
36  
37  
38  
39  
40  
41  
42  
43  
44  
45  
46  
47  
48  
49  
50  
51  
52  
53  
54  
55  
56  
57  
58  
59  
60

**6. Mean (or median) age:**

**7. ASA class:**

**8. Comorbidities and risk factors:**

**9. Preoperative diagnosis, including percentages (if available):**

**10. Surgery, including percentages (e.g. knee replacement, hysterectomy, colectomy):**

**11. Surgical approach, including percentages (e.g. open, laparoscopic, arthroscopic):**

**12. Hospital length of stay (if means or medians not reported, please specify the target length of stay or indicate 'day surgery'):**

**13. Other characteristics of enrolled subjects (relevant to the study):**

#### **D. INTERVENTIONS**

**1. Group label (e.g. opioid-free/based):**

**2. Analgesia intervention before surgery (pre-emptive analgesia intervention initiated in the preoperative period), if any:**

**3. Analgesia and anesthesia interventions in the operating room (e.g. systemic drugs, peripheral nerve blocks, epidural, spinal analgesia and/or local infiltrations):**

**4. Analgesia intervention after surgery (in hospital):**

**5. Analgesia intervention after surgery (after hospital discharge):**

**6. Other relevant characteristics of the intervention(s), or comments:**

#### **E. OUTCOMES**

**1. Outcome name**

**2. Outcome type (e.g. continuous, dichotomous)**

1  
2  
3  
4 **3. Reported as [e.g. mean ( $\pm$  SD), percentage, etc.]**  
5

6  
7 **4. Outcome group (i.e. primary, secondary)**  
8  
9

10 **5. Outcome reported (e.g. fully reported, not reported)**  
11  
12

13  
14 **6. Scale**  
15

16  
17 **7. Range**  
18  
19

20 **8. Unit of measurement**  
21  
22

23 **9. Direction (e.g. lower is better, higher is better)**  
24  
25

26 **10. Notes**  
27  
28  
29  
30  
31  
32  
33  
34  
35  
36  
37  
38  
39  
40  
41  
42  
43  
44  
45  
46  
47  
48  
49  
50  
51  
52  
53  
54  
55  
56  
57  
58  
59  
60

**PRISMA-P (Preferred Reporting Items for Systematic review and Meta-Analysis Protocols) 2015 checklist: recommended items to address in a systematic review protocol\***

| Section and topic                 | Item No | Checklist item                                                                                                                                                                                                                | Reported on page # |
|-----------------------------------|---------|-------------------------------------------------------------------------------------------------------------------------------------------------------------------------------------------------------------------------------|--------------------|
| <b>ADMINISTRATIVE INFORMATION</b> |         |                                                                                                                                                                                                                               |                    |
| Title:                            |         |                                                                                                                                                                                                                               |                    |
| Identification                    | 1a      | Identify the report as a protocol of a systematic review                                                                                                                                                                      | p.1                |
| Update                            | 1b      | If the protocol is for an update of a previous systematic review, identify as such                                                                                                                                            | N/A                |
| Registration                      | 2       | If registered, provide the name of the registry (such as PROSPERO) and registration number                                                                                                                                    | N/A                |
| Authors:                          |         |                                                                                                                                                                                                                               |                    |
| Contact                           | 3a      | Provide name, institutional affiliation, e-mail address of all protocol authors; provide physical mailing address of corresponding author                                                                                     | p.1-2              |
| Contributions                     | 3b      | Describe contributions of protocol authors and identify the guarantor of the review                                                                                                                                           | p. 16              |
| Amendments                        | 4       | If the protocol represents an amendment of a previously completed or published protocol, identify as such and list changes; otherwise, state plan for documenting important protocol amendments                               | N/A                |
| Support:                          |         |                                                                                                                                                                                                                               |                    |
| Sources                           | 5a      | Indicate sources of financial or other support for the review                                                                                                                                                                 | N/A                |
| Sponsor                           | 5b      | Provide name for the review funder and/or sponsor                                                                                                                                                                             | N/A                |
| Role of sponsor or funder         | 5c      | Describe roles of funder(s), sponsor(s), and/or institution(s), if any, in developing the protocol                                                                                                                            | N/A                |
| <b>INTRODUCTION</b>               |         |                                                                                                                                                                                                                               |                    |
| Rationale                         | 6       | Describe the rationale for the review in the context of what is already known                                                                                                                                                 | p. 5               |
| Objectives                        | 7       | Provide an explicit statement of the question(s) the review will address with reference to participants, interventions, comparators, and outcomes (PICO)                                                                      | p. 6               |
| <b>METHODS</b>                    |         |                                                                                                                                                                                                                               |                    |
| Eligibility criteria              | 8       | Specify the study characteristics (such as PICO, study design, setting, time frame) and report characteristics (such as years considered, language, publication status) to be used as criteria for eligibility for the review | p. 7-8             |
| Information sources               | 9       | Describe all intended information sources (such as electronic databases, contact with study authors, trial registers or other grey literature sources) with planned dates of coverage                                         | p. 6-7             |
| Search strategy                   | 10      | Present draft of search strategy to be used for at least one electronic database, including planned limits, such that it could be repeated                                                                                    | Supplement 1       |



1  
2  
3  
4  
5  
6  
7  
8  
9  
10  
11  
12  
13  
14  
15  
16  
17  
18  
19  
20  
21  
22  
23  
24  
25  
26  
27  
28  
29  
30  
31  
32  
33  
34  
35  
36  
37  
38  
39  
40  
41  
42  
43  
44  
45  
46

|                                    |     |                                                                                                                                                                                                                                                     |                   |
|------------------------------------|-----|-----------------------------------------------------------------------------------------------------------------------------------------------------------------------------------------------------------------------------------------------------|-------------------|
| Study records:                     |     |                                                                                                                                                                                                                                                     |                   |
| Data management                    | 11a | Describe the mechanism(s) that will be used to manage records and data throughout the review                                                                                                                                                        | p. 9-11           |
| Selection process                  | 11b | State the process that will be used for selecting studies (such as two independent reviewers) through each phase of the review (that is, screening, eligibility and inclusion in meta-analysis)                                                     | p. 8-9            |
| Data collection process            | 11c | Describe planned method of extracting data from reports (such as piloting forms, done independently, in duplicate), any processes for obtaining and confirming data from investigators                                                              | p. 10-11          |
| Data items                         | 12  | List and define all variables for which data will be sought (such as PICO items, funding sources), any pre-planned data assumptions and simplifications                                                                                             | p. 9-10           |
| Outcomes and prioritization        | 13  | List and define all outcomes for which data will be sought, including prioritization of main and additional outcomes, with rationale                                                                                                                | p. 9-10           |
| Risk of bias in individual studies | 14  | Describe anticipated methods for assessing risk of bias of individual studies, including whether this will be done at the outcome or study level, or both; state how this information will be used in data synthesis                                | p. 11-12          |
| Data synthesis                     | 15a | Describe criteria under which study data will be quantitatively synthesised                                                                                                                                                                         | p. 12-13          |
|                                    | 15b | If data are appropriate for quantitative synthesis, describe planned summary measures, methods of handling data and methods of combining data from studies, including any planned exploration of consistency (such as I <sup>2</sup> , Kendall's τ) | p. 14-15          |
|                                    | 15c | Describe any proposed additional analyses (such as sensitivity or subgroup analyses, meta-regression)                                                                                                                                               | p. 14-15          |
|                                    | 15d | If quantitative synthesis is not appropriate, describe the type of summary planned                                                                                                                                                                  | N/A               |
| Meta-bias(es)                      | 16  | Specify any planned assessment of meta-bias(es) (such as publication bias across studies, selective reporting within studies)                                                                                                                       | p. 11-12          |
| Confidence in cumulative evidence  | 17  | Describe how the strength of the body of evidence will be assessed (such as GRADE)                                                                                                                                                                  | p. 12 and Table 3 |

**\* It is strongly recommended that this checklist be read in conjunction with the PRISMA-P Explanation and Elaboration (cite when available) for important clarification on the items. Amendments to a review protocol should be tracked and dated. The copyright for PRISMA-P (including checklist) is held by the PRISMA-P Group and is distributed under a Creative Commons Attribution Licence 4.0.**

*From: Shamseer L, Moher D, Clarke M, Ghersi D, Liberati A, Petticrew M, Shekelle P, Stewart L, PRISMA-P Group. Preferred reporting items for systematic review and meta-analysis protocols (PRISMA-P) 2015: elaboration and explanation. BMJ. 2015 Jan 2;349(jan02 1):g7647.*

# BMJ Open

## Opioid versus opioid-free analgesia after surgical discharge: protocol for a systematic review and meta-analysis

|                                 |                                                                                                                                                                                                                                                                                                                                                                                                                                                                                                                                                                                                                                                                                                                                                                                                                                                                                                                                                                                                                                                                                                                                                                                                                                                                                                                                                                                                                                                                                                                                                                                                                                                                                                                                                                                                                                                                                                                                                                          |
|---------------------------------|--------------------------------------------------------------------------------------------------------------------------------------------------------------------------------------------------------------------------------------------------------------------------------------------------------------------------------------------------------------------------------------------------------------------------------------------------------------------------------------------------------------------------------------------------------------------------------------------------------------------------------------------------------------------------------------------------------------------------------------------------------------------------------------------------------------------------------------------------------------------------------------------------------------------------------------------------------------------------------------------------------------------------------------------------------------------------------------------------------------------------------------------------------------------------------------------------------------------------------------------------------------------------------------------------------------------------------------------------------------------------------------------------------------------------------------------------------------------------------------------------------------------------------------------------------------------------------------------------------------------------------------------------------------------------------------------------------------------------------------------------------------------------------------------------------------------------------------------------------------------------------------------------------------------------------------------------------------------------|
| Journal:                        | <i>BMJ Open</i>                                                                                                                                                                                                                                                                                                                                                                                                                                                                                                                                                                                                                                                                                                                                                                                                                                                                                                                                                                                                                                                                                                                                                                                                                                                                                                                                                                                                                                                                                                                                                                                                                                                                                                                                                                                                                                                                                                                                                          |
| Manuscript ID                   | bmjopen-2019-035443.R1                                                                                                                                                                                                                                                                                                                                                                                                                                                                                                                                                                                                                                                                                                                                                                                                                                                                                                                                                                                                                                                                                                                                                                                                                                                                                                                                                                                                                                                                                                                                                                                                                                                                                                                                                                                                                                                                                                                                                   |
| Article Type:                   | Protocol                                                                                                                                                                                                                                                                                                                                                                                                                                                                                                                                                                                                                                                                                                                                                                                                                                                                                                                                                                                                                                                                                                                                                                                                                                                                                                                                                                                                                                                                                                                                                                                                                                                                                                                                                                                                                                                                                                                                                                 |
| Date Submitted by the Author:   | 16-Dec-2019                                                                                                                                                                                                                                                                                                                                                                                                                                                                                                                                                                                                                                                                                                                                                                                                                                                                                                                                                                                                                                                                                                                                                                                                                                                                                                                                                                                                                                                                                                                                                                                                                                                                                                                                                                                                                                                                                                                                                              |
| Complete List of Authors:       | <p>El-Kefraoui, Charbel; McGill University Health Centre, Steinberg-Bernstein Centre for Minimally Invasive Surgery and Innovation; McGill University, Division of Experimental Surgery</p> <p>Olleik, Ghadeer; McGill University Health Centre, Steinberg-Bernstein Centre for Minimally Invasive Surgery and Innovation; McGill University, Division of Experimental Surgery</p> <p>Chay, Marc-Aurele; McGill University Faculty of Medicine</p> <p>Kouyoumdjian, Araz; McGill University Health Centre, Steinberg-Bernstein Centre for Minimally Invasive Surgery and Innovation; McGill University, Department of Surgery</p> <p>Nguyen-Powanda, Philip; McGill University, Division of Experimental Surgery</p> <p>Rajabiyazdi, Fateme; McGill University Health Centre, Steinberg-Bernstein Centre for Minimally Invasive Surgery and Innovation; McGill University, Division of Experimental Surgery</p> <p>Do, Uyen; McGill University Health Centre, Steinberg-Bernstein Centre for Minimally Invasive Surgery and Innovation; McGill University, Division of Experimental Surgery</p> <p>Derksen, Alexa; McGill University, Child Health and Human Development Program; Clinical Research Institute of Montreal</p> <p>Landry, Tara; Universite de Montreal, Bibliothèque de la Santé</p> <p>Amar-Zifkin, Alexandre; McGill University Health Centre, Medical Libraries</p> <p>Ramanakumar, Agnihotram; McGill University, Department of Oncology</p> <p>Martel, Marc-Olivier; McGill University, Dentistry &amp; Anesthesia</p> <p>Baldini, Gabriele; McGill University, Department of Anaesthesia</p> <p>Feldman, Liane; McGill University Health Centre, Steinberg-Bernstein Centre for Minimally Invasive Surgery and Innovation; McGill University, Department of Surgery</p> <p>Fiore Jr, Julio; McGill University, Department of Surgery; McGill University Health Centre, Steinberg-Bernstein Centre for Minimally Invasive Surgery and Innovation</p> |
| <b>Primary Subject Heading</b>: | Surgery                                                                                                                                                                                                                                                                                                                                                                                                                                                                                                                                                                                                                                                                                                                                                                                                                                                                                                                                                                                                                                                                                                                                                                                                                                                                                                                                                                                                                                                                                                                                                                                                                                                                                                                                                                                                                                                                                                                                                                  |
| Secondary Subject Heading:      | Addiction, Anaesthesia, Dentistry and oral medicine, Surgery                                                                                                                                                                                                                                                                                                                                                                                                                                                                                                                                                                                                                                                                                                                                                                                                                                                                                                                                                                                                                                                                                                                                                                                                                                                                                                                                                                                                                                                                                                                                                                                                                                                                                                                                                                                                                                                                                                             |
| Keywords:                       | SURGERY, PAIN MANAGEMENT, Adult surgery < SURGERY                                                                                                                                                                                                                                                                                                                                                                                                                                                                                                                                                                                                                                                                                                                                                                                                                                                                                                                                                                                                                                                                                                                                                                                                                                                                                                                                                                                                                                                                                                                                                                                                                                                                                                                                                                                                                                                                                                                        |
|                                 |                                                                                                                                                                                                                                                                                                                                                                                                                                                                                                                                                                                                                                                                                                                                                                                                                                                                                                                                                                                                                                                                                                                                                                                                                                                                                                                                                                                                                                                                                                                                                                                                                                                                                                                                                                                                                                                                                                                                                                          |

1  
2  
3  
4  
5  
6  
7  
8  
9  
10  
11  
12  
13  
14  
15  
16  
17  
18  
19  
20  
21  
22  
23  
24  
25  
26  
27  
28  
29  
30  
31  
32  
33  
34  
35  
36  
37  
38  
39  
40  
41  
42  
43  
44  
45  
46  
47  
48  
49  
50  
51  
52  
53  
54  
55  
56  
57  
58  
59  
60

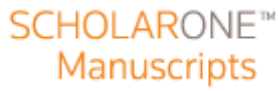

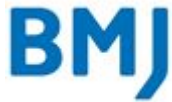

I, the Submitting Author has the right to grant and does grant on behalf of all authors of the Work (as defined in the below author licence), an exclusive licence and/or a non-exclusive licence for contributions from authors who are: i) UK Crown employees; ii) where BMJ has agreed a CC-BY licence shall apply, and/or iii) in accordance with the terms applicable for US Federal Government officers or employees acting as part of their official duties; on a worldwide, perpetual, irrevocable, royalty-free basis to BMJ Publishing Group Ltd ("BMJ") its licensees and where the relevant Journal is co-owned by BMJ to the co-owners of the Journal, to publish the Work in this journal and any other BMJ products and to exploit all rights, as set out in our [licence](#).

The Submitting Author accepts and understands that any supply made under these terms is made by BMJ to the Submitting Author unless you are acting as an employee on behalf of your employer or a postgraduate student of an affiliated institution which is paying any applicable article publishing charge ("APC") for Open Access articles. Where the Submitting Author wishes to make the Work available on an Open Access basis (and intends to pay the relevant APC), the terms of reuse of such Open Access shall be governed by a Creative Commons licence – details of these licences and which [Creative Commons](#) licence will apply to this Work are set out in our licence referred to above.

Other than as permitted in any relevant BMJ Author's Self Archiving Policies, I confirm this Work has not been accepted for publication elsewhere, is not being considered for publication elsewhere and does not duplicate material already published. I confirm all authors consent to publication of this Work and authorise the granting of this licence.

1  
2  
3 **Opioid versus opioid-free analgesia after surgical discharge: protocol for a systematic**  
4 **review and meta-analysis**  
5  
6

7  
8 Charbel El-Kefraoui <sup>1,2</sup>, Ghadeer Olleik <sup>1,2</sup>, Marc-Aurele Chay <sup>3</sup>, Araz Kouyoumdjian <sup>1,4</sup>, Philip  
9  
10 Nguyen-Powanda <sup>2</sup>, Fateme Rajabiyazdi <sup>1,2</sup>, Uyen Do <sup>1,2</sup>, Alexa Derksen <sup>5,6</sup>, Tara Landry <sup>7</sup>,  
11  
12 Alexandre Amar-Zifkin <sup>8</sup>, Ramanakumar Agnihotram <sup>9</sup>, Marc Martel <sup>10,11</sup>, Gabriele Baldini <sup>2,12</sup>,  
13  
14 Liane S Feldman <sup>1,2,4,9</sup>, Julio F Fiore Jr. <sup>1,2,4,9</sup>  
15  
16

17  
18 <sup>1</sup> Steinberg-Bernstein Centre for Minimally Invasive Surgery and Innovation, McGill University  
19  
20 Health Centre, Montreal, QC, Canada.  
21

22  
23 <sup>2</sup> Division of Experimental Surgery, McGill University, Montreal, QC, Canada.  
24

25  
26 <sup>3</sup> Faculty of Medicine, McGill University, Montreal, QC, Canada.  
27

28  
29 <sup>4</sup> Department of Surgery, McGill University, Montreal, QC, Canada.  
30

31  
32 <sup>5</sup> Child Health and Human Development Program, Research Institute of the McGill University  
33  
34 Health Centre, Montreal, Canada.  
35

36  
37 <sup>6</sup> Translational Proteomics Laboratory, Institut de Recherches Cliniques de Montréal, Montreal,  
38  
39 Canada.  
40

41  
42 <sup>7</sup> Bibliothèque de la santé, Université de Montréal, Montreal, QC, Canada.  
43

44  
45 <sup>8</sup> Medical Libraries, McGill University Health Centre, Montreal, QC, Canada.  
46

47  
48 <sup>9</sup> Centre for Outcomes Research and Evaluation (CORE), Research Institute of the McGill  
49  
50 University Health Centre, Montreal, QC, Canada.  
51

52  
53 <sup>10</sup> Experimental Medicine Division, McGill University, Montreal, Canada.  
54

55  
56 <sup>11</sup> Faculty of Dentistry and Department of Anaesthesia, McGill University, Montreal, Canada.  
57

58  
59 <sup>12</sup> Department of Anaesthesia, McGill University, Montreal, QC, Canada.  
60

1  
2  
3 **Correspondence and reprints:**  
4

5  
6 Julio Flavio Fiore Jr, PhD  
7

8  
9 Assistant Professor, Department of Surgery, McGill University  
10

11 Address: Montreal General Hospital. 1650 Cedar Ave, R2-104. Montreal, Quebec, H3G 1A4  
12

13  
14 Tel: (514) 709-2066  
15

16  
17 Fax: (514) 934-1934 (ext. 48475)  
18

19  
20 Email: julio.fiorejunior@mcgill.ca  
21

22  
23 **Word count: 3,466**  
24  
25  
26  
27  
28  
29  
30  
31  
32  
33  
34  
35  
36  
37  
38  
39  
40  
41  
42  
43  
44  
45  
46  
47  
48  
49  
50  
51  
52  
53  
54  
55  
56  
57  
58  
59  
60

## ABSTRACT

### Introduction

Excessive prescribing after surgery has contributed to a public-health crisis of opioid addiction and overdose in North America. However, the value of prescribing opioids to manage postoperative pain after surgical-discharge remains unclear. We propose a systematic review and meta-analysis to assess the extent to which opioid analgesia impact postoperative pain-intensity and adverse events in comparison to opioid-free analgesia in patients discharged after surgery.

### Methods and analysis

Major electronic databases (MEDLINE, EMBASE, Cochrane Library, Scopus, Amed, Biosis, CINAHL and PsycINFO) will be searched for multi-dose randomized-trials examining the comparative-effectiveness of opioid versus opioid-free analgesia after surgical-discharge. Studies published from January 1990 to July 2019 will be targeted, with no language restrictions. The search will be re-run before manuscript submission to include most recent literature. We will consider studies involving patients undergoing minor and major surgery. Teams of reviewers will, independently and in duplicate, assess eligibility, extract data, and evaluate risk of bias. Our main outcomes of interest are pain-intensity and postoperative vomiting. Study results will be pooled using random-effects models. When trials report outcomes for a common domain (e.g. pain-intensity) using different scales, we will convert effect sizes to a common standard metric (e.g. visual analogue scale). Minimally important clinical differences reported in previous literature will be considered when interpreting results. Sub-group analyses defined *a priori* will be conducted to explore heterogeneity. Risk of bias will be assessed according to the Cochrane Collaboration's Risk of Bias Tool 2.0. The quality of evidence for all outcomes will be evaluated using the GRADE rating system.

## Ethics and dissemination

Ethical approval is not required since this is a systematic review of published studies. Our results will be published in a peer-reviewed journal and presented at relevant conferences. Further knowledge dissemination will be sought via public and patient-organizations focused on pain and opioid-related harms.

## Strengths and limitations of this study

- This will be the first systematic review to synthesise the evidence on the comparative-effectiveness of opioid vs. opioid-free analgesia after postoperative discharge.
- This review will address a major knowledge gap that hinders the use of evidence-based prescribing as a strategy to mitigate postoperative opioid-related harms.
- We will use robust statistical methods to meta-analyse data from RCTs, but these methods are not free from limitations when outcome reporting is heterogeneous.
- The quality and strength of evidence will be evaluated using the Cochrane Collaboration's Risk of Bias Tool 2.0 and the GRADE framework.



## INTRODUCTION

North America is facing a devastating opioid crisis exacerbated by excessive prescribing.[1,2] Surgery often serves as a gateway for opioid-naïve patients to obtain an opioid prescription,[3] and spiral into misuse and addiction.[4-8] Reports from Canada and the United States suggest that 6-14% of patients who are prescribed opioids after surgical discharge become persistent opioid users, i.e. they continue to take the drug for more than three months after surgery.[5, 9-12] Interestingly, rates of persistent opioid use are similar among patients undergoing major,[5, 10, 11] and minor surgeries.[12] Patients who do not become persistent users postoperatively may also contribute to the opioid crisis by diverting unused tablets for nonmedical use by others - up to 70% of all opioid tablets prescribed to surgical patients go unused and may become a source for diversion.[13] Given these factors, recent literature suggests that postoperative opioid prescribing should be judicious and based on the best available evidence regarding benefits and harms.[14, 15]

Studies have shown that postoperative pain management using only non-opioid drugs is common internationally but not in Canada nor in the United States, where opioid tablets are often prescribed instead of, or in addition to, non-opioid analgesics.[16-20] In countries such as the Netherlands,[21] China,[22] and Chile,[23] reported rates of opioid prescribing after surgical discharge range from 0% to 5%, while in North America, 80% to 95% of patients receive an opioid prescription to manage postoperative pain at home.[16-20] A recent study indicates that surgical patients in Canada and the United States fill opioid prescriptions at a rate that is seven times higher than those in Sweden.[24] Remarkably, in countries where opioids are not a mainstay for postoperative analgesia, pain-related outcomes (i.e. satisfaction with pain management) after surgery are often superior to North America.[16-18] This may, in part, reflect a potential therapeutic superiority of non-opioid drugs or increased opioid-related adverse events such as postoperative vomiting. Although these findings bring

1  
2  
3 into question the value of prescribing opioids to manage acute pain after surgical discharge, the decision  
4 to prescribe opioids must be informed by robust systematic reviews and meta-analyses focused on the  
5 comparative-effectiveness of opioid versus opioid-free postoperative analgesia. These, however, are  
6 currently non-existent in the literature.[25]  
7  
8  
9

10  
11 We therefore propose to undertake a systematic review and meta-analysis to summarize the evidence  
12 regarding the comparative-effectiveness of opioid versus opioid-free analgesia after discharge following  
13 surgery. Our study will follow the principles of the PICO framework,[26] and aims to respond to the  
14 following research questions: (1) in patients discharged after surgery, to what extent does opioid  
15 analgesia impact postoperative pain intensity in comparison to opioid-free analgesia? And (2) in patients  
16 discharged after surgery, to what extent does opioid analgesia impact the risk of postoperative vomiting  
17 in comparison to opioid-free analgesia?  
18  
19  
20  
21  
22  
23  
24  
25  
26  
27

## 28 **METHODS AND ANALYSIS**

### 29 **Design**

30  
31 This protocol was designed according to the Preferred Reporting Items for Systematic Review and  
32 Meta-Analysis Protocols (PRISMA-P) statement.[27] A draft protocol was circulated among our  
33 knowledge synthesis team [composed of synthesis leaders (JF, GB, and LF), synthesis managers  
34 (CEK and UD), a patient partner (AD), and collaborators] and adjustments were made according to  
35 their feedback. Any future amendments to this protocol and corresponding rationale will be tracked  
36 and dated.  
37  
38  
39  
40  
41  
42  
43  
44  
45  
46  
47

### 48 **Literature search**

49  
50 A comprehensive search of major electronic databases [MEDLINE (via Ovid), EMBASE (via  
51 Ovid), The Cochrane Library (via Wiley), Scopus (via Elsevier), Amed (via Ovid), Biosis (via  
52 Clarivate), CINAHL (via Ebsco) and PsycINFO (via Ovid)] will be conducted to identify relevant  
53  
54  
55  
56  
57  
58  
59  
60

1  
2  
3 studies. The main strategy (MEDLINE) was developed by an experienced medical librarian and  
4 information specialist (TL) with input from the synthesis team (Supplement 1). Subsequently, a  
5 second medical librarian peer-reviewed this search strategy according to Peer Review of Electronic  
6 Search Strategies (PRESS) standards,[28] and changes were made as required. The vocabulary and  
7 syntax of the MEDLINE strategy was tailored to allow adaptation and optimal electronic searching  
8 of the other databases. Searches will target articles published after January 1990, as earlier  
9 publications do not reflect current standards of surgical care with the widespread use of minimally  
10 invasive surgery and perioperative care pathways.[29-32] The initial search was conducted in July  
11 2019 and will be re-run prior to manuscript submission to ensure the inclusion of most recent  
12 literature. No language limitation will be applied. A combined library of the retrieved articles will  
13 be created using Covidence systematic review software (Veritas Health Innovation, Melbourne,  
14 Australia; <https://www.covidence.org/>).[33] Duplicates will be excluded. To ensure literature  
15 saturation, we will also search trial registries (ClinicalTrials.gov and the WHO's International  
16 Clinical Trials Registry Platform), conference proceedings (identified via Scopus, Embase, Biosis,  
17 and Cochrane Library), articles cited by the included articles (identified via Scopus) and articles that  
18 cited the included articles (identified via Scopus). Furthermore, we will contact authors to obtain  
19 aggregated data from trials that were completed but not published.  
20  
21  
22  
23  
24  
25  
26  
27  
28  
29  
30  
31  
32  
33  
34  
35  
36  
37  
38  
39  
40  
41  
42

### 43 **Eligibility criteria**

44  
45 We will include studies that: (1) are parallel RCTs, (2) enrolled youth and/or adults patients (>15  
46 years old) undergoing minor or major surgeries according to the WHO definition,[34, 35] (Table 1),  
47 (3) compared a post-discharge analgesia regimen including opioids (analgesic drugs that act on  
48 opioid receptors, such as codeine, oxycodone, hydromorphone, tramadol, and morphine) versus an  
49 analgesia regimen including only non-opioid drugs (such as acetaminophen, NSAIDs,  
50  
51  
52  
53  
54  
55  
56  
57  
58  
59  
60

1  
2  
3 gabapentinoids) and (4) involved a multiple-dose design focused on the overall effect of repeated  
4 doses of the prescribed analgesics. Our age cut-off was chosen based on data showing fast-growing  
5 rates of opioid poisoning in youths over 15 years old.[36, 37] Studies involving any non-invasive  
6 route of analgesic administration (i.e. oral, transmucosal, transdermal and rectal) will be considered  
7 for inclusion. Studies where opioids were offered to the opioid-free group as rescue analgesia for  
8 breakthrough pain (i.e. pain that erupts while a patient is already medicated) will be included only if  
9 the opioid drugs were not readily available to patients (i.e. a new prescription was required via  
10 contact with a healthcare provider). Studies where patients received opioids while in the hospital or  
11 clinic will be included if the post-discharge analgesia was according to our inclusion criteria.

12  
13  
14 We will exclude single-dose trials as they do not reflect 'real-world' practices where analgesia  
15 regimens span several days postoperatively.[38] Besides, postoperative analgesia trials with a  
16 single-dose design have been extensively systematically reviewed in previous literature.[38, 39] We  
17 will also exclude: (1) placebo-controlled trials where no active analgesic drugs are offered to  
18 patients (they do not reflect standard practice), (2) studies where the postoperative analgesia  
19 regimen is not clearly described (e.g. placebo-controlled trials with unclear description of analgesics  
20 given in addition to placebo), (3) studies exclusively focused on children ( $\leq 15$  years old), (4)  
21 studies with post-discharge analgesia administered via invasive routes such as intravenous or  
22 epidural (rarely prescribed after surgical discharge), and (5) studies evaluating analgesia for chronic  
23 postoperative pain (treatment starting beyond 2 months after surgery).[40]

### 24 25 26 27 28 29 30 31 32 33 34 35 36 37 38 39 40 41 42 43 44 45 46 47 48 **Selection of studies**

49  
50 The titles/abstracts of the articles identified by our search strategy will be evaluated against the  
51 review's eligibility criteria by pairs of reviewers. Due to the anticipated large number of articles to  
52 be screened, eight reviewers (all with previous training in healthcare research) will be involved in  
53  
54  
55  
56  
57

1  
2  
3 the screening process. Screening will be conducted, independently and in duplicate, using the  
4  
5 Covidence software.[33] Two lead reviewers (JF and CEK) will pilot-test the eligibility criteria on  
6  
7 the first 100 titles and abstracts identified by the search. To harmonize the rest of the screening  
8  
9 process, reviewers will attend a training session and conduct a pilot screening of at least 20  
10  
11 titles/abstracts to prompt clarifications. A screening decision table was created to guide decision-  
12  
13 making (Supplement 2). To ensure accuracy, all titles/abstracts will be screened by at least one lead  
14  
15 member of the synthesis team (JF or CEK). Disagreements regarding eligibility will be resolved by  
16  
17 consensus between the reviewers or by consulting an adjudicator (LF).  
18  
19

20  
21  
22 Articles that are clearly irrelevant will be excluded after examination of titles and abstracts; those  
23  
24 that are potentially eligible will have their full-text versions retrieved and evaluated against the  
25  
26 eligibility criteria. Publications in non-English language will be translated into English by an ISO  
27  
28 certified translation company. Full-text screening will be conducted by two lead members of the  
29  
30 synthesis team (JF and CEK) using the Covidence platform.[33] The extent of agreement between  
31  
32 reviewers during full-text screening will be assessed using Kappa statistics (thresholds: <0.20 slight  
33  
34 agreement, 0.21–0.40 fair agreement, 0.41–0.60 moderate agreement, 0.61–0.80 substantial  
35  
36 agreement and >0.80 almost perfect agreement).[41] Disagreements will be resolved by consensus  
37  
38 or by consulting an adjudicator (LF).  
39  
40  
41

### 42 43 **Outcome measures**

44  
45  
46 The primary outcome of interest in this review will be patient self-reported outcomes focused on  
47  
48 postoperative pain intensity (i.e. self-perceived magnitude of pain at a given time postoperatively).  
49

50  
51 The secondary *a priori* outcome of interest will be the risk of postoperative vomiting. These  
52  
53 outcomes were chosen based on previous literature that showed good pain relief to be the most  
54  
55 desirable outcome in perioperative care according to patient preference, while postoperative  
56  
57

1  
2  
3 vomiting is the least desirable outcome.[42-44] If data are available in the eligible studies, we will  
4  
5 also explore the association of the interventions with other endpoints included in core outcome sets  
6  
7 for research in perioperative care.[45, 46] These include: (1) drug adverse events (other than  
8  
9 vomiting), (2) patient satisfaction with pain management, (3) participant disposition (i.e. withdrawal  
10  
11 due to adverse events or ineffective treatment) (4) self-reported postoperative health status [overall  
12  
13 and domain-based scores, vitality (i.e. fatigue), physical function, emotional function, social  
14  
15 function, role function (i.e. work or other daily activities), sleep function], (5) emergency room  
16  
17 visits and (6) hospital readmissions.  
18  
19  
20  
21

### 22 **Data charting**

23  
24 A customized data extraction form was collectively developed by the synthesis team (Supplement  
25  
26 3). This form will be pilot tested by two independent reviewers (JF and CEK). Subsequently, a team  
27  
28 meeting will take place to discuss potential issues and refine the form. Finally, the refined data  
29  
30 extraction form will be integrated into the Covidence software.[33] Data extraction will be  
31  
32 conducted, independently and in duplicate, by pairs of reviewers. The following data will be  
33  
34 extracted from each study: author, publication date, study location, number of participating centres,  
35  
36 funding source, inclusion and exclusion criteria, sample size (patients randomized and patients  
37  
38 analysed in each group), patient characteristics (age, sex, clinical condition, type of surgery and  
39  
40 proportion receiving preoperative opioids, if available), surgery classification (major vs. minor),  
41  
42 type of anaesthesia, in-hospital analgesia interventions (if applicable), hospital length of stay (if  
43  
44 applicable), characteristics of the post-discharge analgesia intervention [drugs, dosage (in morphine  
45  
46 equivalents for opioids,[47]), frequency of administration and duration], outcome measures  
47  
48 assessed, time points of assessment and duration of follow-up.  
49  
50  
51  
52  
53  
54  
55  
56  
57  
58  
59  
60

1  
2  
3 The number of reviewers involved in data extraction will depend on the number of RCTs fulfilling  
4 our eligibility criteria. To harmonize data extraction, reviewers will attend a training session,  
5  
6 our eligibility criteria. To harmonize data extraction, reviewers will attend a training session,  
7  
8 conduct at least 2 pilot extractions, and receive a written 'data extraction guide' with detailed  
9  
10 instructions. To ensure accuracy, at least one lead member of the synthesis team (JF or CEK) will  
11  
12 extract data from each article. Data extracted in duplicate will be cross-checked by an independent  
13  
14 third reviewer. Discrepancies in the extracted data will be resolved by consensus between the  
15  
16 reviewers after revisiting the full-text article. If discrepancies remain, an adjudicator will be  
17  
18 consulted (LF).  
19  
20

21  
22 As this meta-analysis is focused on acute pain management after surgery, we will target outcome  
23  
24 data collected up to 30 days postoperatively (from the day when the trial analgesia regimens were  
25  
26 prescribed). Data regarding pain intensity (primary outcome) will be assessed as described in Table  
27  
28 2. Postoperative vomiting (secondary outcome) will be assessed as a dichotomous measure  
29  
30 (presence of vomiting: yes/no). The assessment of other outcomes will be exploratory and will  
31  
32 depend on whether data is available and how they are reported.  
33  
34

### 35 36 **Methodological quality of individual studies**

37  
38  
39 Risk of bias will be assessed independently and in duplicate by two lead members of the synthesis  
40  
41 team (JF and CEK) using the Cochrane Collaboration's Risk of Bias Tool 2.0 for randomized trials  
42  
43 (RoB 2.0).[48] Assessments will be conducted using an iterative form available online  
44  
45 ([www.riskofbias.info/](http://www.riskofbias.info/)). The RoB 2.0 appraises risk of bias across five domains: (1) bias arising  
46  
47 from the randomization process, (2) bias due to deviations from intended interventions, (3) bias due  
48  
49 to missing outcome data, (4) bias in measurement of the outcome, and (5) bias in selection of the  
50  
51 reported result. The domain concerning missing outcome data will be assessed according to  
52  
53 Akl,[49] and Ebrahim.[50] For each domain, risk of bias will be judged as 'low risk', 'some  
54  
55  
56  
57  
58  
59  
60

concerns', or 'high risk'. Studies are considered to have an overall 'high risk of bias' if at least one domain is judged as 'high risk'. Disagreements regarding risk of bias will be resolved by consensus or by consulting an adjudicator (LF).

Quality of evidence (i.e. confidence in the effect estimates) will be assessed using the GRADE rating system.[51] Assessment will be conducted on an outcome-by-outcome basis by two lead members of the synthesis team (JF and CEK) working independently.[52] Specific guidelines will be followed to improve reliability.[53-74] Disagreements will be resolved by consensus or by consulting an adjudicator (LF). In the GRADE system, RCTs are initially rated as 'high confidence' evidence but may be rated down by one or more of five categories of limitations: (1) risk of bias, (2) inconsistency, (3) indirectness, (4) imprecision, and (5) publication bias.[51] After considering these categories, the confidence in estimates for each outcome will be categorized according to Table 3. Publication bias will be formally assessed by visual assessment of funnel plot asymmetry,[75] and by Begg's test,[76] when there are at least 10 studies available for meta-analysis. The final results will be summarized in an evidence profile.[51]

### **Data synthesis**

For data synthesis, we will primarily assess the treatment effects of opioid versus opioid-free analgesia across all surgical procedures that are eligible for this review; however, we will also explore potential sources of heterogeneity between trials by assessing treatment effects across specific surgical contexts. Meta-analyses will be conducted using random-effects models, which are conservative in considering that the 'true' effect of an intervention may vary across different trials.[77] Weighted mean differences (WMDs) and 95% confidence intervals (95% CIs) will be calculated for pain intensity data reported by more than one RCT. The principle of 'weighting' by the inverse of the variance aims to attribute more weight to studies that provide more information



1  
2  
3 about the treatment effect.[78] Methods described in the Cochrane Handbook will be used to  
4  
5 estimate the mean and standard deviation (SD) when median, range and sample size are reported,  
6  
7 and to impute the SD if the standard error (SE) or SD for the differences are not reported.[79]  
8  
9  
10 Relative risks (RRs) with associated 95% CIs will be calculated for dichotomous data reported by  
11  
12 more than one RCT (i.e. secondary outcome: vomiting). Analyses will follow the Hartung-Knapp-  
13  
14 Sidik-Jonkman method as evidence supports that this approach outperforms traditional random-  
15  
16 effects methods such as DerSimonian-Laird (known to lead to high type I error rates when the  
17  
18 number of studies is small and there is moderate or substantial heterogeneity).[80] All analyses will  
19  
20 be conducted using Stata statistical software version (Version 15.1, StataCorp, College Station,  
21  
22 Texas, USA). Comparisons will be 2-tailed and use a threshold  $p \leq 0.05$ .  
23  
24  
25

26  
27 Interpreting effect estimates for pain intensity is challenging as this outcome can be assessed using  
28  
29 different scales [e.g. visual analogue scale (VAS), numerical rating scale (NRS), SF-36 bodily pain  
30  
31 scale, or other scales]. To address this issue, we will follow specific guidelines to standardize this  
32  
33 outcome into a standard metric.[81-83] We chose the 10cm Pain Intensity VAS (score range 0-10  
34  
35 cm; lower score represents less pain) as this is the pain intensity scale most commonly used in acute  
36  
37 pain trials.[84-86] The process of standardization is described in Table 4. Once the WMD between  
38  
39 opioid versus opioid-free analgesia is calculated for a given outcome, we will contextualize this  
40  
41 value in relation to the corresponding minimally important difference (MID): the smallest change in  
42  
43 score that patients perceive as important.[87] Reported MID in VAS pain scores for surgical  
44  
45 patients, according to anchor-based methods, is 1/10cm.[88] As recommended by the OMERACT  
46  
47 initiative,[81] we will use pain intensity WMD and MID data to determine the strength of the  
48  
49 intervention effect, as described in Table 5.  
50  
51  
52  
53  
54  
55  
56  
57  
58  
59  
60

1  
2  
3 When assessing pain intensity data, to further optimize the interpretation of meta-analyses results,  
4 we will also calculate the proportion of patients who reported adequate pain control (no more than  
5 mild pain, as determined by a pain score <3/10cm VAS).[88, 89] By assuming a normal distribution  
6 of postoperative pain scores in both groups, differences in risk of reporting adequate pain control  
7 will be derived with its associated 95% CIs.[81-83]  
8  
9  
10  
11  
12  
13

14  
15 If we identify more than one trial measuring the exploratory outcomes of interest in this knowledge  
16 synthesis (e.g. patient satisfaction, self-reported postoperative health status, readmissions), data will  
17 be meta-analysed and reported as WMDs (continuous measures) or RRs (dichotomous measures),  
18 as appropriate. Where relevant, outcome data using different metrics will be converted into a  
19 standard metric according to guideline recommendations.[81-83] Focused literature searches will be  
20 conducted to identify anchor-based MIDAs.[87]  
21  
22  
23  
24  
25  
26  
27  
28

29 Heterogeneity between the RCTs included in the meta-analyses will be assessed using the  $\chi^2$  test  
30 and the  $I^2$  test.[90] To explore potential sources of heterogeneity, we will test the *a priori*  
31 hypothesis that opioid analgesia has a larger effect in trials where patients are expected to feel more  
32 pain, such as those involving: (1) major surgery versus minor surgery,[5] (2) day surgery (i.e. with  
33 same-day discharge) versus in-patient surgery (i.e. at least one overnight stay in the hospital),[25]  
34 and (3) only women as participants [those reporting sex-specific data or involving sex-specific  
35 surgeries (e.g. gynaecological, breast)] versus men.[91-93] We also hypothesize that (4) trials with  
36 high risk of bias (versus lower risk of bias) will report larger effect sizes.[94, 95] Other clustering  
37 strategies for subgroup analyses [e.g. by surgical specialty (e.g. dental surgery, orthopaedic  
38 surgery), specific types of surgery (e.g. cholecystectomy, molar excision), type of anaesthesia (e.g.  
39 general, neuraxial, regional anaesthesia), study geographic location (e.g. North America)] will be  
40 decided based on the characteristics of the trials identified, in consultation with clinicians (i.e.  
41  
42  
43  
44  
45  
46  
47  
48  
49  
50  
51  
52  
53  
54  
55  
56  
57  
58  
59  
60

1  
2  
3 knowledge users) who care for the relevant surgical populations. These post-hoc subgroup analyses  
4  
5 will be planned after data extraction, but prior to analyses of results. All subgroup analyses will be  
6  
7 conducted regardless of heterogeneity estimates if there are at least two trials in each subgroup.  
8  
9 Tests of interaction will be performed to establish if subgroups differed significantly from one  
10  
11 another.[96]  
12  
13

### 14 15 **Patient and public involvement**

16  
17 A patient partner (AD) is part of our synthesis team. She brings in her lived experiences with  
18  
19 postoperative pain and analgesic requirements after surgical discharge to ensure that our findings  
20  
21 are responsive to the needs of patients. She will be actively involved in all stages of this research  
22  
23 project and will contribute her experiential knowledge to inform our research design, data  
24  
25 interpretation, as well as to optimize strategies for knowledge dissemination and translation. In  
26  
27 addition to traditional channels of knowledge dissemination (i.e. conference presentations, peer-  
28  
29 reviewed publication), further dissemination will be sought via public and patient organizations  
30  
31 focused on pain and opioid-related harms.  
32  
33  
34  
35

### 36 37 **SIGNIFICANCE**

38  
39 North America is currently facing a major public-health crisis of opioid abuse. Opioid-based  
40  
41 postoperative pain management is recognized as one of the driving forces behind this crisis. Given  
42  
43 how commonly postoperative overprescription contributes to misuse, diversion, addiction and  
44  
45 death, there is an urgent need to address this element of the opioid crisis. Alternatives to opioids are  
46  
47 often overlooked, while they should be incorporated as the foundation of postoperative pain  
48  
49 management whenever possible. This may prevent more people from becoming addicted in the  
50  
51 future (it is impossible to become addicted without exposure) and, also importantly, reduce  
52  
53 diversion of unused prescriptions. Our systematic review will provide key information to guide  
54  
55  
56  
57  
58  
59  
60

1  
2  
3 clinical decision-making regarding analgesia prescription after surgery. This work has the potential  
4  
5 to contribute practice-changing evidence to inform future guidelines aimed to improve analgesia  
6  
7 prescribing and mitigate postoperative opioid-related harms.  
8  
9

## 10 **ETHICS AND DISSEMINATION**

11  
12  
13 The results of this study will be published in an international peer-reviewed journal and presented at  
14  
15 relevant conferences. This review will inform future guidelines on postoperative analgesia  
16  
17 prescription. Ethical approval is not required since this is a systematic review based on published  
18  
19 studies.  
20  
21  
22  
23  
24  
25  
26  
27  
28  
29  
30  
31  
32  
33  
34  
35  
36  
37  
38  
39  
40  
41  
42  
43  
44  
45  
46  
47  
48  
49  
50  
51  
52  
53  
54  
55  
56  
57  
58  
59  
60

## ACKNOWLEDGEMENTS

We thank Haley Montgomery, Aditya Pal, Rosa Lakabi, Andrew Miller and Sharlin Azad for their assistance in reviewing and editing the manuscript.

## AUTHORS' CONTRIBUTIONS

CEK, GB, LF, and JF contributed to the conception and the design of the study. CEK and JF wrote the first draft of the protocol. CEK, GO, MAC, AK, PNP, FR, UD, AD, TL, AAZ, RA, MM, GB, LF, and JF revised the protocol critically for important intellectual content. JF is the guarantor of this review. All authors have read and approved the final version of the manuscript to be published.

## FUNDING

This research is supported by funds from Fonds de Recherche du Québec-Santé granted to JF (Établissement de jeunes chercheurs, dossier #36799).

## COMPETING INTERESTS

JF has received grants from Merck and personal fees for consulting from Shionogi. LSF has received grants from Merck and Johnson & Johnson.

## TABLES

**Table 1. Definition of surgery (minor and major) according to the World Health Organization (WHO)**

|                      |                                                                                                                                                 |
|----------------------|-------------------------------------------------------------------------------------------------------------------------------------------------|
| <b>Surgery</b>       | Any intervention involving the incision, excision, manipulation or suturing of tissue and requiring regional or general anesthesia or sedation. |
| <b>Minor surgery</b> | A surgical intervention occurring <u>in a physician's office or clinic</u> (e.g. tooth extraction, cataract surgery, skin tumor excision).      |
| <b>Major surgery</b> | A surgical intervention occurring <u>in a hospital operating theatre</u> (e.g. cesarean section, appendectomy, open fracture repair).           |

**Table 2. Primary outcome data (pain intensity after surgical discharge)**

|                                           |                                                                                                                                                                                                                                                                                                                                                                                                                                                                                                                                                                                                                                                                                                                                    |
|-------------------------------------------|------------------------------------------------------------------------------------------------------------------------------------------------------------------------------------------------------------------------------------------------------------------------------------------------------------------------------------------------------------------------------------------------------------------------------------------------------------------------------------------------------------------------------------------------------------------------------------------------------------------------------------------------------------------------------------------------------------------------------------|
| <b>Pain assessment time points</b>        | <ul style="list-style-type: none"> <li>Multi-dose analgesia trials often involve the assessment of pain intensity at different time-points after surgical discharge.</li> <li>We will focus on the following time points after surgical discharge: Day 0 (6-12 hours after prescription), Day 1 (13-24 hours), Day 2 (25-48 hours), Day 3 (49-72 hours), Days 4-7 (3-168 hours), Days 8-30 (169 to 720 hours).</li> <li>These time points were the most commonly reported in the eligible trials identified by our scoping review and preliminary MEDLINE search.</li> <li>We will consider for analysis the last measure obtained within the timepoint interval (i.e. the measure closest to the interval upper bound)</li> </ul> |
| <b>The primary time point of interest</b> | <ul style="list-style-type: none"> <li>Our primary time point of interest will be <u>Day 1</u> after discharge (<u>13-24 hours</u>), as evidence suggests that this is the period after surgery when patients report most severe pain.</li> </ul>                                                                                                                                                                                                                                                                                                                                                                                                                                                                                  |
| <b>Other important considerations</b>     | <ul style="list-style-type: none"> <li>We will prioritize reports of dynamic pain (during movement) over pain at rest if both are reported. Dynamic pain is deemed more relevant to the process of postoperative recovery.</li> <li>We will also prioritize reports of 'worst pain' over 'average pain'. The latter is highly influenced by variations in instructions (e.g. should periods without any pain accounted for when pain is 'averaged?').</li> </ul>                                                                                                                                                                                                                                                                   |

**Table 3. GRADE certainty ratings**

| <b>Certainty</b> | <b>Interpretation</b>                                                                         |
|------------------|-----------------------------------------------------------------------------------------------|
| Very low         | The true effect is probably markedly different from the estimated effect.                     |
| Low              | The true effect might be markedly different from the estimated effect.                        |
| Moderate         | The authors believe that the true effect is probably close to the estimated effect.           |
| High             | The authors have a lot of confidence that the true effect is similar to the estimated effect. |

Adapted from <https://bestpractice.bmj.com/info/toolkit/learn-ebm/what-is-grade/>

**Table 4. Process of standardization (rescaling) of pain intensity measures into a common metric.**

|               |                                                                                                                                                                                                                                                                                                                                                                                  |
|---------------|----------------------------------------------------------------------------------------------------------------------------------------------------------------------------------------------------------------------------------------------------------------------------------------------------------------------------------------------------------------------------------|
| <b>Step 1</b> | <ul style="list-style-type: none"> <li>• Non-VAS pain intensity scales will be initially converted into standardized mean differences (SMD), by dividing the between-group differences in means (in each trial), by the pooled SD of the two groups.</li> <li>• The SMD expresses the intervention effect in SD units, rather than the original units of measurement.</li> </ul> |
| <b>Step 2</b> | <ul style="list-style-type: none"> <li>• Standardization will be done by multiplying the SMD by the SD of the VAS scale.</li> <li>• The SD used here will be the pooled SD obtained from the largest trial where pain intensity was assessed via VAS.</li> </ul>                                                                                                                 |
| <b>Step 3</b> | <ul style="list-style-type: none"> <li>• Standardized data (now presented as a VAS score) will be meta-analyzed with data from other trials (i.e. those that used VAS or had pain data converted into VAS) to calculate a pooled WMD in VAS scores.</li> </ul>                                                                                                                   |

**Table 5. Interpretation of weighed mean differences (WMDs) in relation to minimal important differences (MIDs)**

|                                                                |                                                                                 |
|----------------------------------------------------------------|---------------------------------------------------------------------------------|
| <b>Very large effect</b> (most patients are likely to benefit) | <b>WMD equal or above 2 MIDs</b> ( $WMD \geq 2MIDs$ )                           |
| <b>Large effect</b> (many patients may benefit)                | <b>WMD equal or above 1 MID, but below 2 MIDs</b> ( $1 MID \leq WMD < 2 MIDs$ ) |
| <b>Moderate effect</b> (some patients may benefit)             | <b>WMD above 0.5 MID, but below 1 MID</b> ( $0.5 MID < WMD < 1 MIDs$ )          |
| <b>Small effect</b> (most patients are unlikely to benefit)    | <b>WMD equal or below 0.5 MID</b> ( $0.5 MID \leq WMD < 1 MIDs$ )               |

**REFERENCES**

1. The Lancet. The opioid crisis in the USA: a public health emergency. *Lancet* 2017;390(10107):2016. doi:10.1016/S0140-6736(17)32808-8
2. Fischer B, Pang M, Tyndall M. The opioid death crisis in Canada: crucial lessons for public health. *Lancet Public Health* 2019;4(2):e81-e82. doi:10.1016/S2468-2667(18)30232-9
3. Pasricha SV, Tadrous M, Khuu W, et al. Clinical indications associated with opioid initiation for pain management in Ontario, Canada: a population-based cohort study. *Pain* 2018;159(8):1562-1568. doi:10.1097/j.pain.0000000000001242
4. Alam A, Gomes T, Zheng H, et al. Long-term analgesic use after low-risk surgery: a retrospective cohort study. *Arch Intern Med* 2012;172(5):425-430. doi:10.1001/archinternmed.2011.1827
5. Brummett MC, Waljee JF, Goesling J, et al. New persistent opioid use after minor and major surgical procedures in US adults. *JAMA Surg* 2017;152(6):e170504. doi:10.1001/jamasurg.2017.0504
6. Clarke H, Soneji N, Ko DT, et al. Rates and risk factors for prolonged opioid use after major surgery: population based cohort study. *BMJ* 2014;348:g1251. doi:10.1136/bmj.g1251
7. Jiang X, Orton M, Feng R, et al. Chronic opioid usage in surgical patients in a large academic center. *Ann Surg* 2017;265(4):722-727. doi:10.1097/SLA.0000000000001780
8. Sun EC, Darnall BD, Baker LC, et al. Incidence of and risk factors for chronic opioid use among opioid-naive patients in the postoperative period. *JAMA Intern Med* 2016;176(9):1286-1293. doi:10.1001/jamainternmed.2016.3298



- 1  
2  
3 9. Brescia AA, Harrington CA, Mazurek AA, et al. Factors associated with new persistent opioid  
4 usage after lung resection. *Ann Thorac Surg* 2019;107(2):363-368.  
5  
6 doi:10.1016/j.athoracsur.2018.08.057  
7  
8  
9
- 10 10. Goesling J, Moser SE, Zaidi B, et al. Trends and predictors of opioid use after total knee and  
11 total hip arthroplasty. *Pain* 2016;157(6):1259-1265. doi:10.1097/j.pain.0000000000000516  
12  
13
- 14 11. Lee JS, Hu HM, Edelman AL, et al. New persistent opioid use among patients with cancer after  
15 curative-intent surgery. *J Clin Oncol* 2017;35(36):4042-4049. doi:10.1200/JCO.2017.74.1363  
16  
17  
18
- 19 12. Schroeder AR, Dehghan M, Newman TB, et al. Association of opioid prescriptions from dental  
20 clinicians for US adolescents and young adults with subsequent opioid use and abuse. *JAMA*  
21  
22  
23  
24  
25 *Intern Med* 2019;179(2):145-152. doi:10.1001/jamainternmed.2018.5419
- 26 13. Bicket MC, Long JJ, Pronovost PJ, et al. Prescription opioid analgesics commonly unused after  
27 surgery: a systematic review. *JAMA Surg* 2017;152(11):1066-1071.  
28  
29  
30  
31  
32 doi:10.1001/jamasurg.2017.0831
- 33 14. Neuman MD, Bateman BT, Wunsch H. Inappropriate opioid prescription after surgery. *Lancet*  
34  
35  
36  
37 2019;393(10180):1547-1557. doi:10.1016/S0140-6736(19)30428-3
- 38 15. Wu CL, King AB, Geiger TM, et al. American society for enhanced recovery and perioperative  
39 quality initiative joint consensus statement on perioperative opioid minimization in opioid-  
40 naïve patients. *Anesth Analg* 2019;129(2):567-577. doi:10.1213/ANE.00000000000004194  
41  
42  
43  
44
- 45 16. Barasch A, Safford MM, McNeal SF, et al. Patterns of postoperative pain medication  
46 prescribing after invasive dental procedures. *Spec Care Dentist* 2011;31(2):53-57.  
47  
48  
49  
50  
51  
52  
53  
54  
55  
56  
57  
58  
59  
60 doi:10.1111/j.1754-4505.2011.00181.x
17. Eid AI, DePesa C, Nordestgaard AT, et al. Variation of opioid prescribing patterns among  
patients undergoing similar surgery on the same acute care surgery service of the same

- 1  
2  
3 institution: time for standardization? *Surgery* 2018;164(5):926-930.  
4  
5 doi:10.1016/j.surg.2018.05.047  
6  
7  
8 18. Nooromid MJ, Blay E Jr., Holl JL, et al. Discharge prescription patterns of opioid and  
9  
10 nonopioid analgesics after common surgical procedures. *Pain Rep* 2018;3(1):e637.  
11  
12 doi:10.1097/PR9.0000000000000637  
13  
14  
15 19. Thiels CA, Anderson SS, Ubl DS, et al. Wide variation and overprescription of opioids after  
16  
17 elective surgery. *Ann Surg* 2017;266(4):564-573. doi:10.1097/SLA.0000000000002365  
18  
19  
20 20. Lancaster E, Inglis-Arkell C, Hirose K, et al. Variability in opioid-prescribing patterns in  
21  
22 endocrine surgery and discordance with patient use. *JAMA Surg* Published Online First: 14  
23  
24 August 2019. doi:10.1001/jamasurg.2019.2518  
25  
26  
27 21. Lindenhovius ALC, Helmerhorst GTT, Schnellen AC, et al. Differences in prescription of  
28  
29 narcotic pain medication after operative treatment of hip and ankle fractures in the United  
30  
31 States and the Netherlands. *J Trauma* 2009;67(1):160-164. doi:10.1097/TA.0b013e31818c12ee  
32  
33  
34 22. Li RJ, Loyo Li M, Leon E, et al. Comparison of opioid utilization patterns after major head and  
35  
36 neck procedures between Hong Kong and the United States. *JAMA Otolaryngol Head Neck*  
37  
38 *Surg* 2018;144(11):1060-1065. doi:10.1001/jamaoto.2018.1787  
39  
40  
41 23. Fader L, Whitaker J, Lopez M, et al. Tibia fractures and NSAIDs. Does it make a difference? A  
42  
43 multicenter retrospective study. *Injury* 2018;49(12):2290-2294.  
44  
45 doi:10.1016/j.injury.2018.09.024  
46  
47  
48 24. Ladha KS, Neuman MD, Broms G, et al. Opioid prescribing after surgery in the United States,  
49  
50 Canada, and Sweden. *JAMA Netw Open* 2019;2(9):e1910734-e34.  
51  
52 doi:10.1001/jamanetworkopen.2019.10734  
53  
54  
55  
56  
57  
58  
59  
60

- 1  
2  
3 25. Fiore Jr J, Olleik G, El-Kefraoui C, et al. Preventing opioid prescription after major surgery: A  
4  
5 scoping literature review on opioid-free postoperative analgesia. *Br J Anaesth*  
6  
7 2019;123(5):627-636. doi:10.1016/j.bja.2019.08.014  
8  
9
- 10 26. Schardt C, Adams MB, Owens T, et al. Utilization of the PICO framework to improve  
11  
12 searching PubMed for clinical questions. *BMC Med Inform Decis Mak* 2007;7(1):16.  
13  
14 doi:10.1186/1472-6947-7-16  
15  
16
- 17 27. Shamseer L, Moher D, Clarke M, et al. Preferred reporting items for systematic review and  
18  
19 meta-analysis protocols (PRISMA-P) 2015: elaboration and explanation. *BMJ* 2015;349:g7647.  
20  
21 doi: 10.1136/bmj.g7647  
22  
23
- 24 28. McGowan J, Sampson M, Salzwedel DM, et al. PRESS peer review of electronic search  
25  
26 strategies: 2015 guideline statement. *J Clin Epidemiol* 2016;75(1):40-46.  
27  
28 doi:10.1016/j.jclinepi.2016.01.021  
29  
30
- 31 29. Christensen GJ. The advantages of minimally invasive dentistry. *J Am Dent Assoc*  
32  
33 2005;136(11):1563-5. doi:10.14219/jada.archive.2005.0088  
34  
35
- 36 30. Howard DH. Trends in the use of knee arthroscopy in adults. *JAMA Intern Med*  
37  
38 2018;178(11):1557-58. doi:10.1001/jamainternmed.2018.4175  
39
- 40 31. Waite PD, Cherala S. Surgical outcomes for suture-less surgery in 366 impacted third molar  
41  
42 patients. *J Oral Maxillofac Surg* 2006;64(4):669-73. doi:10.1016/j.joms.2005.12.014  
43  
44
- 45 32. Donlon WC, Truta MP. Minimally invasive third molar surgery. *J Oral Maxillofac Surg*  
46  
47 2007;65(2):359. doi:10.1016/j.joms.2006.11.001  
48
- 49 33. Covidence Community. *Covidence*. 2019. [https://community.cochrane.org/help/tools-and-](https://community.cochrane.org/help/tools-and-software/covidence)  
50  
51 [software/covidence](https://community.cochrane.org/help/tools-and-software/covidence). Accessed September 02, 2019.  
52  
53  
54  
55  
56  
57  
58  
59  
60

- 1  
2  
3 34. Debas H GR, McCord C, Thind A. *Surgery*. Disease Control Priorities in Developing  
4 Countries, 2006. <https://www.who.int/surgery/SurgeryDebasworldbank.pdf?ua=1>. Accessed  
5  
6 September 09, 2019.  
7  
8  
9  
10 35. Weiser TG, Regenbogen SE, Thompson KD, et al. An estimation of the global volume of  
11 surgery: a modelling strategy based on available data. *Lancet* 2008;372(9633):139-44.  
12  
13 doi:10.1016/S0140-6736(08)60878-8  
14  
15  
16  
17 36. Government of Canada. *Canada's Opioid Crisis (fact sheet)*. 2019.  
18  
19 <https://www.canada.ca/en/health-canada/services/publications/healthy-living/canada-opioid->  
20 [crisis-fact-sheet.html](https://www.canada.ca/en/health-canada/services/publications/healthy-living/canada-opioid-). Accessed September 30, 2019.  
21  
22  
23  
24 37. Gomes T, Tadrous M, Mamdani MM, et al. The burden of opioid-related mortality in the  
25 United States. *JAMA Netw Open* 2018;1(2):e180217-e17.  
26  
27 doi:10.1001/jamanetworkopen.2018.0217  
28  
29  
30  
31 38. Moore RA, Derry S, Aldington D, et al. Single dose oral analgesics for acute postoperative pain  
32 in adults - an overview of Cochrane reviews. *Cochrane Database Syst Rev* 2015(9):CD008659.  
33  
34 doi:10.1002/14651858.CD008659.pub3  
35  
36  
37  
38 39. Moore RA, Derry S, Aldington D, et al. Adverse events associated with single dose oral  
39 analgesics for acute postoperative pain in adults - an overview of Cochrane reviews. *Cochrane*  
40 *Database Syst Rev* 2015(10):CD011407. doi:10.1002/14651858.CD011407.pub2  
41  
42  
43  
44  
45 40. Macrae WA. Chronic pain after surgery. *Br J Anaesth* 2001;87(1):88-98.  
46  
47 doi:10.1093/bja/87.1.88  
48  
49  
50 41. Landis JR, Koch GG. The measurement of observer agreement for categorical data. *Biometrics*  
51 1977;33(1):159-74. doi:10.2307/2529310  
52  
53  
54  
55  
56  
57  
58  
59  
60

- 1  
2  
3 42. Carvalho B, Cohen SE, Lipman SS, et al. Patient preferences for anesthesia outcomes  
4 associated with cesarean delivery. *Anesth Analg* 2005;101(4):1182-7.  
5  
6 doi:10.1213/01.ane.0000167774.36833.99  
7  
8  
9  
10 43. Gan TJ, Lubarsky DA, Flood EM, et al. Patient preferences for acute pain treatment. *Br J*  
11  
12 *Anaesth* 2004;92(5):681-88. doi:10.1093/bja/aei123  
13  
14 44. Macario A, Weinger M, Carney S, et al. Which clinical anesthesia outcomes are important to  
15 avoid? The perspective of patients. *Anesth Analg* 1999;89(3):652-8. doi:10.1097/00000539-  
16 199909000-00022  
17  
18  
19  
20  
21 45. Jammer I, Wickboldt N, Sander M, et al. Standards for definitions and use of outcome  
22 measures for clinical effectiveness research in perioperative medicine: European Perioperative  
23 Clinical Outcome (EPCO) definitions: a statement from the ESA-ESICM joint taskforce on  
24 perioperative outcome measures. *Eur J Anaesthesiol* 2015;32(2):88-105.  
25  
26 doi:10.1097/eja.0000000000000118  
27  
28  
29  
30  
31  
32 46. Myles PS, Boney O, Botti M, et al. Systematic review and consensus definitions for the  
33 standardised endpoints in perioperative medicine (StEP) initiative: patient comfort. *Br J*  
34 *Anaesth* 2018;120(4):705-11. doi:10.1016/j.bja.2017.12.037  
35  
36  
37  
38  
39 47. Nielsen S, Degenhardt L, Hoban B, et al. A synthesis of oral morphine equivalents (OME) for  
40 opioid utilisation studies. *Pharmacoepidemiol Drug Saf* 2016;25(6):733-7.  
41  
42  
43  
44  
45  
46 doi:10.1002/pds.3945  
47  
48 48. Sterne J, Savović J, Page MJ, et al. RoB 2: a revised tool for assessing risk of bias in  
49 randomised trials. *BMJ* 2019;366:l4898. doi:10.1136/bmj.l4898  
50  
51 49. Akobeng AK. Understanding systematic reviews and meta-analysis. *Arch Dis Child*  
52 2005;90:845-48. doi:10.1136/adc.2004.058230  
53  
54  
55  
56  
57  
58  
59  
60

- 1  
2  
3 50. Ebrahim S, Akl EA, Mustafa RA, et al. Addressing continuous data for participants excluded  
4 from trial analysis: a guide for systematic reviewers. *J Clin Epidemiol* 2013;66(9):1014-21.  
5  
6 doi:10.1016/j.jclinepi.2013.03.014  
7  
8  
9  
10 51. Guyatt GH, Oxman AD, Vist GE, et al. GRADE: an emerging consensus on rating quality of  
11 evidence and strength of recommendations. *BMJ* 2008;336(7650):924-26.  
12  
13 doi:10.1136/bmj.39489.470347.AD  
14  
15  
16 52. Meader N, King K, Llewellyn A, et al. A checklist designed to aid consistency and  
17 reproducibility of GRADE assessments: development and pilot validation. *Syst Rev*  
18 2014;3(1):82. doi:10.1186/2046-4053-3-82  
19  
20  
21  
22 53. Andrews J, Guyatt G, Oxman AD, et al. GRADE guidelines: 14. Going from evidence to  
23 recommendations: the significance and presentation of recommendations. *J Clin Epidemiol*  
24 2013;66(7):719-25. doi:10.1016/j.jclinepi.2012.03.013  
25  
26  
27  
28 54. Andrews JC, Schunemann HJ, Oxman AD, et al. GRADE guidelines: 15. Going from evidence  
29 to recommendation-determinants of a recommendation's direction and strength. *J Clin*  
30 *Epidemiol* 2013;66(7):726-35. doi:10.1016/j.jclinepi.2013.02.003  
31  
32  
33  
34 55. Balshem H, Helfand M, Schunemann HJ, et al. GRADE guidelines: 3. Rating the quality of  
35 evidence. *J Clin Epidemiol* 2011;64(4):401-6. doi:10.1016/j.jclinepi.2010.07.015  
36  
37  
38  
39 56. Brunetti M, Shemilt I, Pregno S, et al. GRADE guidelines: 10. Considering resource use and  
40 rating the quality of economic evidence. *J Clin Epidemiol* 2013;66(2):140-50.  
41  
42  
43  
44  
45  
46  
47  
48 57. Guyatt G, Oxman AD, Akl EA, et al. GRADE guidelines: 1. Introduction-GRADE evidence  
49 profiles and summary of findings tables. *J Clin Epidemiol* 2011;64(4):383-94.  
50  
51  
52  
53  
54  
55  
56  
57  
58  
59  
60

- 1  
2  
3 58. Guyatt G, Oxman AD, Sultan S, et al. GRADE guidelines: 11. Making an overall rating of  
4 confidence in effect estimates for a single outcome and for all outcomes. *J Clin Epidemiol*  
5 2013;66(2):151-7. doi:10.1016/j.jclinepi.2012.01.006  
6  
7  
8  
9  
10 59. Guyatt GH, Ebrahim S, Alonso-Coello P, et al. GRADE guidelines 17: assessing the risk of  
11 bias associated with missing participant outcome data in a body of evidence. *J Clin Epidemiol*  
12 2017;87:14-22. doi:10.1016/j.jclinepi.2017.05.005  
13  
14  
15  
16  
17 60. Guyatt GH, Oxman AD, Kunz R, et al. GRADE guidelines: 2. Framing the question and  
18 deciding on important outcomes. *J Clin Epidemiol* 2011;64(4):395-400.  
19 doi:10.1016/j.jclinepi.2010.09.012  
20  
21  
22  
23  
24 61. Guyatt GH, Oxman AD, Kunz R, et al. GRADE guidelines 6. Rating the quality of evidence--  
25 imprecision. *J Clin Epidemiol* 2011;64(12):1283-93. doi:10.1016/j.jclinepi.2011.01.012  
26  
27  
28  
29 62. Guyatt GH, Oxman AD, Kunz R, et al. GRADE guidelines: 8. Rating the quality of evidence--  
30 indirectness. *J Clin Epidemiol* 2011;64(12):1303-10. doi:10.1016/j.jclinepi.2011.04.014  
31  
32  
33  
34 63. Guyatt GH, Oxman AD, Kunz R, et al. GRADE guidelines: 7. Rating the quality of evidence--  
35 inconsistency. *J Clin Epidemiol* 2011;64(12):1294-302. doi:10.1016/j.jclinepi.2011.03.017  
36  
37  
38  
39 64. Guyatt GH, Oxman AD, Montori V, et al. GRADE guidelines: 5. Rating the quality of  
40 evidence--publication bias. *J Clin Epidemiol* 2011;64(12):1277-82.  
41 doi:10.1016/j.jclinepi.2011.01.011  
42  
43  
44  
45 65. Guyatt GH, Oxman AD, Santesso N, et al. GRADE guidelines: 12. Preparing summary of  
46 findings tables-binary outcomes. *J Clin Epidemiol* 2013;66(2):158-72.  
47 doi:10.1016/j.jclinepi.2012.01.012  
48  
49  
50  
51 66. Guyatt GH, Oxman AD, Sultan S, et al. GRADE guidelines: 9. Rating up the quality of  
52 evidence. *J Clin Epidemiol* 2011;64(12):1311-6. doi:10.1016/j.jclinepi.2011.06.004  
53  
54  
55  
56  
57  
58  
59  
60

- 1  
2  
3 67. Guyatt GH, Oxman AD, Vist G, et al. GRADE guidelines: 4. Rating the quality of evidence--  
4 study limitations (risk of bias). *J Clin Epidemiol* 2011;64(4):407-15.  
5  
6 doi:10.1016/j.jclinepi.2010.07.017  
7  
8  
9  
10 68. Guyatt GH, Thorlund K, Oxman AD, et al. GRADE guidelines: 13. Preparing summary of  
11 findings tables and evidence profiles-continuous outcomes. *J Clin Epidemiol* 2013;66(2):173-  
12 83. doi:10.1016/j.jclinepi.2012.08.001  
13  
14  
15  
16  
17 69. Kumar A, Miladinovic B, Guyatt GH, et al. GRADE guidelines system is reproducible when  
18 instructions are clearly operationalized even among the guidelines panel members with limited  
19 experience with GRADE. *J Clin Epidemiol* 2016;75:115-8. doi:10.1016/j.jclinepi.2015.11.020  
20  
21  
22  
23  
24 70. Schunemann HJ, Cuello C, Akl EA, et al. GRADE guidelines: 18. How ROBINS-I and other  
25 tools to assess risk of bias in nonrandomized studies should be used to rate the certainty of a  
26 body of evidence. *J Clin Epidemiol* 2019;111:105-14. doi:10.1016/j.jclinepi.2018.01.012  
27  
28  
29  
30  
31 71. Schunemann HJ, Mustafa R, Brozek J, et al. GRADE Guidelines: 16. GRADE evidence to  
32 decision frameworks for tests in clinical practice and public health. *J Clin Epidemiol*  
33 2016;76:89-98. doi:10.1016/j.jclinepi.2016.01.032  
34  
35  
36  
37  
38 72. Schunemann HJ, Mustafa RA, Brozek J, et al. GRADE guidelines: 22. The GRADE approach  
39 for tests and strategies-from test accuracy to patient-important outcomes and recommendations.  
40 *J Clin Epidemiol* 2019;111:69-82. doi:10.1016/j.jclinepi.2019.02.003  
41  
42  
43  
44  
45 73. Zhang Y, Alonso-Coello P, Guyatt GH, et al. GRADE Guidelines: 19. Assessing the certainty  
46 of evidence in the importance of outcomes or values and preferences-Risk of bias and  
47 indirectness. *J Clin Epidemiol* 2019;111:94-104. doi:10.1016/j.jclinepi.2018.01.013  
48  
49  
50  
51  
52  
53  
54  
55  
56  
57  
58  
59  
60



- 1  
2  
3 74. Zhang Y, Coello PA, Guyatt GH, et al. GRADE guidelines: 20. Assessing the certainty of  
4 evidence in the importance of outcomes or values and preferences-inconsistency, imprecision,  
5 and other domains. *J Clin Epidemiol* 2019;111:83-93. doi:10.1016/j.jclinepi.2018.05.011  
6  
7  
8  
9  
10 75. Sterne JAC, Sutton AJ, Ioannidis JPA, et al. Recommendations for examining and interpreting  
11 funnel plot asymmetry in meta-analyses of randomised controlled trials. *BMJ* 2011;343:d4002.  
12 doi:10.1136/bmj.d4002  
13  
14  
15  
16  
17 76. Begg CB, Mazumdar M. Operating characteristics of a rank correlation test for publication  
18 bias. *Biometrics* 1994;50(4):1088-101. doi:10.2307/2533446  
19  
20  
21  
22 77. Serghiou S, Goodman SN. Random-effects meta-analysis: summarizing evidence with caveats.  
23 *JAMA* 2019;321(3):301-02. doi:10.1001/jama.2018.19684  
24  
25  
26  
27 78. Marín-Martínez F, Sánchez-Meca J. Weighting by inverse variance or by sample size in  
28 random-effects meta-analysis. *Educ Psychol Meas* 2009;70(1):56-73.  
29  
30  
31  
32  
33 79. Higgins JPT, Green S. *Cochrane handbook for systematic reviews of interventions*. The  
34 Cochrane Collaboration, 2011. <https://handbook-5-1.cochrane.org>. Accessed Mar 23, 2011.  
35  
36  
37  
38 80. IntHout J, Ioannidis JPA, Borm GF. The Hartung-Knapp-Sidik-Jonkman method for random  
39 effects meta-analysis is straightforward and considerably outperforms the standard  
40 DerSimonian-Laird method. *BMC Med Res Methodol* 2014;14(1):25. doi:10.1186/1471-2288-  
41 14-25  
42  
43  
44  
45  
46  
47 81. Busse JW, Bartlett SJ, Dougados M, et al. Optimal strategies for reporting pain in clinical trials  
48 and systematic reviews: recommendations from an OMERACT 12 workshop. *J Rheumatol*  
49 2015;42(10):1962. doi:10.3899/jrheum.141440  
50  
51  
52  
53  
54  
55  
56  
57  
58  
59  
60

- 1  
2  
3 82. Murad MH, Wang Z, Chu H, et al. When continuous outcomes are measured using different  
4 scales: guide for meta-analysis and interpretation. *BMJ* 2019;364:k4817.  
5  
6 doi:10.1136/bmj.k4817  
7  
8  
9  
10 83. Thorlund K, Walter SD, Johnston BC, et al. Pooling health-related quality of life outcomes in  
11 meta-analysis—a tutorial and review of methods for enhancing interpretability. *Res Synth*  
12 *Methods* 2011;2(3):188-203. doi:10.1002/jrsm.46  
13  
14  
15  
16  
17 84. Gewandter JS, Eisenach JC, Gross RA, et al. Checklist for the preparation and review of pain  
18 clinical trial publications: a pain-specific supplement to CONSORT. *Pain Rep* 2019;4(3):e621.  
19  
20 doi:10.1097/pr9.0000000000000621  
21  
22  
23  
24 85. Gilron I, Carr DB, Desjardins PJ, et al. Current methods and challenges for acute pain clinical  
25 trials. *Pain Rep* 2019;4(3):e647. doi:10.1097/pr9.0000000000000647  
26  
27  
28  
29 86. Sirintawat N, Sawang K, Chaiyasamut T, et al. Pain measurement in oral and maxillofacial  
30 surgery. *J Dent Anesth Pain Med* 2017;17(4):253-63. doi:10.17245/jdapm.2017.17.4.253  
31  
32  
33 87. Schunemann HJ, Guyatt GH. Commentary--goodbye M(C)ID! Hello MID, where do you come  
34 from? *Heath Serv Res* 2005;40(2):593-7. doi:10.1111/j.1475-6773.2005.00374.x  
35  
36  
37  
38 88. Myles PS, Myles DB, Gallagher W, et al. Measuring acute postoperative pain using the visual  
39 analog scale: the minimal clinically important difference and patient acceptable symptom state.  
40 *Br J Anaesth* 2017;118(3):424-29. doi:10.1093/bja/aew466  
41  
42  
43  
44 89. Moore RA, Straube S, Aldington D. Pain measures and cut-offs - 'no worse than mild pain' as a  
45 simple, universal outcome. *Anaesthesia* 2013;68(4):400-12. doi:10.1111/anae.12148  
46  
47  
48  
49 90. Higgins JPT, Thompson SG, Deeks JJ, et al. Measuring inconsistency in meta-analyses. *BMJ*  
50 2003;327(7414):557-60. doi:10.1136/bmj.327.7414.557  
51  
52  
53  
54  
55  
56  
57  
58  
59  
60

- 1  
2  
3 91. Bjornnes AK, Parry M, Lie I, et al. Pain experiences of men and women after cardiac surgery. *J*  
4 *Clin Nurs* 2016;25(19-20):3058-68. doi:10.1111/jocn.13329  
5  
6  
7  
8 92. Cepeda MS, Carr DB. Women experience more pain and require more morphine than men to  
9 achieve a similar degree of analgesia. *Anesth Analg* 2003;97(5):1464-8.  
10  
11  
12 doi:10.1213/01.ane.0000080153.36643.83  
13  
14  
15 93. Rosseland LA, Stubhaug A. Gender is a confounding factor in pain trials: women report more  
16 pain than men after arthroscopic surgery. *Pain* 2004;112(3):248-53.  
17  
18  
19 doi:10.1016/j.pain.2004.08.028  
20  
21  
22 94. Moher D, Pham B, Jones A, et al. Does quality of reports of randomised trials affect estimates  
23 of intervention efficacy reported in meta-analyses? *Lancet* 1998;352(9128):609-13.  
24  
25  
26 doi:10.1016/s0140-6736(98)01085-x  
27  
28  
29 95. Pildal J, Hrobjartsson A, Jorgensen KJ, et al. Impact of allocation concealment on conclusions  
30 drawn from meta-analyses of randomized trials. *Int J Epidemiol* 2007;36(4):847-57.  
31  
32  
33 doi:10.1093/ije/dym087  
34  
35  
36 96. Altman DG, Bland JM. Interaction revisited: the difference between two estimates. *BMJ*  
37  
38  
39  
40  
41  
42  
43  
44  
45  
46  
47  
48  
49  
50  
51  
52  
53  
54  
55  
56  
57  
58  
59  
60

# Supplementary Material

## Table of Contents

|                                                               |    |
|---------------------------------------------------------------|----|
| <b>Supplement 1. Medline search strategy</b> .....            | 2  |
| <b>Supplement 2. Abstract screening decision tables</b> ..... | 9  |
| <b>Supplement 3. Data extraction form</b> .....               | 10 |

For peer review only

## Supplement 1. Medline search strategy

| #  | Searches                                                           |
|----|--------------------------------------------------------------------|
| 1  | Pain, Postoperative/                                               |
| 2  | Postoperative Care/                                                |
| 3  | Postoperative Period/                                              |
| 4  | ((after or following) adj3 (procedur* or resect* or surg*)).tw,kf. |
| 5  | (post-operat* or postoperat* or post-surg* or postsurg*).tw,kf.    |
| 6  | or/2-5                                                             |
| 7  | (analgaes* or analges* or pain).tw,hw,kf.                          |
| 8  | 6 and 7                                                            |
| 9  | 1 or 8                                                             |
| 10 | Acetaminophen/                                                     |
| 11 | exp Adrenal Cortex Hormones/                                       |
| 12 | Amitriptyline/                                                     |
| 13 | exp Analgesics, Non-Narcotic/                                      |
| 14 | Anesthesia, Local/                                                 |
| 15 | exp Anesthetics, Local/                                            |
| 16 | exp Anticonvulsants/                                               |
| 17 | exp Anti-Inflammatory Agents, Non-Steroidal/                       |
| 18 | Aspirin/                                                           |
| 19 | Baclofen/                                                          |
| 20 | Bupivacaine/                                                       |
| 21 | Carbamazepine/                                                     |
| 22 | Celecoxib/                                                         |
| 23 | Clonidine/                                                         |
| 24 | exp Cyclooxygenase 2 Inhibitors/                                   |
| 25 | Desipramine/                                                       |
| 26 | Dexamethasone/                                                     |
| 27 | Dexmedetomidine/                                                   |
| 28 | Diclofenac/                                                        |
| 29 | Diflunisal/                                                        |
| 30 | Dipyron/                                                           |
| 31 | Duloxetine Hydrochloride/                                          |
| 32 | Fenoprofen/                                                        |
| 33 | Flurbiprofen/                                                      |
| 34 | Gabapentin/                                                        |
| 35 | gamma-Aminobutyric Acid/                                           |
| 36 | Ibuprofen/                                                         |
| 37 | Indomethacin/                                                      |
| 38 | Ketamine/                                                          |
| 39 | Ketoprofen/                                                        |
| 40 | Ketorolac/                                                         |
| 41 | Ketorolac Tromethamine/                                            |
| 42 | Lidocaine/                                                         |

|    |                                                                                                                                                                                                                                                                                                                                                                                                                                                                                                                                                                                                                                                                                                                                                                                                                                                                                                                                                                                                                |
|----|----------------------------------------------------------------------------------------------------------------------------------------------------------------------------------------------------------------------------------------------------------------------------------------------------------------------------------------------------------------------------------------------------------------------------------------------------------------------------------------------------------------------------------------------------------------------------------------------------------------------------------------------------------------------------------------------------------------------------------------------------------------------------------------------------------------------------------------------------------------------------------------------------------------------------------------------------------------------------------------------------------------|
| 43 | Mefenamic Acid/                                                                                                                                                                                                                                                                                                                                                                                                                                                                                                                                                                                                                                                                                                                                                                                                                                                                                                                                                                                                |
| 44 | Mepivacaine/                                                                                                                                                                                                                                                                                                                                                                                                                                                                                                                                                                                                                                                                                                                                                                                                                                                                                                                                                                                                   |
| 45 | Methocarbamol/                                                                                                                                                                                                                                                                                                                                                                                                                                                                                                                                                                                                                                                                                                                                                                                                                                                                                                                                                                                                 |
| 46 | Methylprednisolone/                                                                                                                                                                                                                                                                                                                                                                                                                                                                                                                                                                                                                                                                                                                                                                                                                                                                                                                                                                                            |
| 47 | Methylprednisolone Hemisuccinate/                                                                                                                                                                                                                                                                                                                                                                                                                                                                                                                                                                                                                                                                                                                                                                                                                                                                                                                                                                              |
| 48 | Naproxen/                                                                                                                                                                                                                                                                                                                                                                                                                                                                                                                                                                                                                                                                                                                                                                                                                                                                                                                                                                                                      |
| 49 | exp Neuromuscular Agents/                                                                                                                                                                                                                                                                                                                                                                                                                                                                                                                                                                                                                                                                                                                                                                                                                                                                                                                                                                                      |
| 50 | Nortriptyline/                                                                                                                                                                                                                                                                                                                                                                                                                                                                                                                                                                                                                                                                                                                                                                                                                                                                                                                                                                                                 |
| 51 | Phenytoin/                                                                                                                                                                                                                                                                                                                                                                                                                                                                                                                                                                                                                                                                                                                                                                                                                                                                                                                                                                                                     |
| 52 | Piroxicam/                                                                                                                                                                                                                                                                                                                                                                                                                                                                                                                                                                                                                                                                                                                                                                                                                                                                                                                                                                                                     |
| 53 | Prednisolone/                                                                                                                                                                                                                                                                                                                                                                                                                                                                                                                                                                                                                                                                                                                                                                                                                                                                                                                                                                                                  |
| 54 | Prednisone/                                                                                                                                                                                                                                                                                                                                                                                                                                                                                                                                                                                                                                                                                                                                                                                                                                                                                                                                                                                                    |
| 55 | Pregabalin/                                                                                                                                                                                                                                                                                                                                                                                                                                                                                                                                                                                                                                                                                                                                                                                                                                                                                                                                                                                                    |
| 56 | Prilocaine/                                                                                                                                                                                                                                                                                                                                                                                                                                                                                                                                                                                                                                                                                                                                                                                                                                                                                                                                                                                                    |
| 57 | Procaine/                                                                                                                                                                                                                                                                                                                                                                                                                                                                                                                                                                                                                                                                                                                                                                                                                                                                                                                                                                                                      |
| 58 | Triamcinolone/                                                                                                                                                                                                                                                                                                                                                                                                                                                                                                                                                                                                                                                                                                                                                                                                                                                                                                                                                                                                 |
| 59 | Triamcinolone Acetonide/                                                                                                                                                                                                                                                                                                                                                                                                                                                                                                                                                                                                                                                                                                                                                                                                                                                                                                                                                                                       |
| 60 | Venlafaxine Hydrochloride/                                                                                                                                                                                                                                                                                                                                                                                                                                                                                                                                                                                                                                                                                                                                                                                                                                                                                                                                                                                     |
| 61 | (a-methapred or artisono or besonia or dopomedrol or esametone or firmacort or lemod or medesone or medixon or medlone or medrate or m-predrol or medrol or medrone or mesopren or metastab or methyleneprednisolone or methylprednisolon* or metilbetasone or metilprednisolon* or metrisone or metrocort or moderin or nipypan or noretona or predni-n or prednisolone or prednol or promacortine or reactonol or sieropresol or solomet or solumedrol or summicort or suprametil or urbason* or wyacort).mp.                                                                                                                                                                                                                                                                                                                                                                                                                                                                                                |
| 62 | (acetaminophen or paracetamol or tylenol).mp.                                                                                                                                                                                                                                                                                                                                                                                                                                                                                                                                                                                                                                                                                                                                                                                                                                                                                                                                                                  |
| 63 | (acetylsalicylic-acid or aspirin).mp.                                                                                                                                                                                                                                                                                                                                                                                                                                                                                                                                                                                                                                                                                                                                                                                                                                                                                                                                                                          |
| 64 | (accufix or aereoseb-dex or ciprodex or cresophene or decaderm or decadron or decaspray or dexacen or dexacort or dexair or dexamethasone or dexasone or dexasporin or dexone or dexycu or encor-dec or endomethasone or hexadrol or maxidex or maxitrol or neodecadron or neomycin or ozurdex or septomixine or tobradex or tobramycin).mp.                                                                                                                                                                                                                                                                                                                                                                                                                                                                                                                                                                                                                                                                   |
| 65 | (adasone or antocortone or betapar or bicortone or cartancyl or colisone or cortan or cortidelt or cotone or dacorten or dacortin or decortisyl or dellacort or delta-cortelan or delta-cortisone or deldadome or delta-e or delta-some or deltacordene or deltacortisone or deltacortone or deltasone or deltison* or deltra or di-adreson or diadreson or econosone or encorton* or fernisone or fiasone or hostacortin or in-sone or incocortyl or juvason or lisacort or lodotra or lodtra or me-korti or metacortandracin or meticorten or metreton or nisona or nizon or novoprednisone or nurison or orasone or panafcort or panasol or paracort or parmenison or pehacort or preddeltin or prednicen or prednicorm or prednicort or prednicot or prednidib or prednilonga or prednison* or prednitone or prednizon or prednovister or presone or pronison or rayos or rectodelt or retrocortine or servisone or sone or sterapred or supercortil or ultracorten* or winpred or wojtab or zenadrid).mp. |
| 66 | (addaprin or advil or caldolor or dyspel or europofen or genpril or i-prin or IBU-200 or ibuprofen or motrin or neoProfen or novo-profen or provil).mp.                                                                                                                                                                                                                                                                                                                                                                                                                                                                                                                                                                                                                                                                                                                                                                                                                                                        |
| 67 | (adepril or amavil or amilit or amineurin or amiplin or amiprin or amitid or amitril or amitrip or amitriptyline or amyline or amyrole or anapsique or annoyiltin or apo-peram or belpax or damilen-hydrochloride or daprimen or deprex or domical or elatrol or elatrolet or elavil or enafon or endep or etrafon or etravil or kyliran or laroxyl or larozyl or lentizol or levate or levazine or limbitrol or maxivalet or miketorin or mitaptyline or nornaln or novoprotect or novitriptyn or oasil-m or pinsanu or pinsaun or proavil or rantoron or redomex or saroten or sarotena or syneudon or teperin or                                                                                                                                                                                                                                                                                                                                                                                            |

|    |                                                                                                                                                                                                                                                                                                                                                                                                                                                                                                                                                                                                                                                                                                                                                                                                                                                                                                                                                                                                                                                                                                                                                                                                                                                                                                                                                    |
|----|----------------------------------------------------------------------------------------------------------------------------------------------------------------------------------------------------------------------------------------------------------------------------------------------------------------------------------------------------------------------------------------------------------------------------------------------------------------------------------------------------------------------------------------------------------------------------------------------------------------------------------------------------------------------------------------------------------------------------------------------------------------------------------------------------------------------------------------------------------------------------------------------------------------------------------------------------------------------------------------------------------------------------------------------------------------------------------------------------------------------------------------------------------------------------------------------------------------------------------------------------------------------------------------------------------------------------------------------------|
|    | trepiline or triavil or tridep or tripta or triptizol or triptyn or trynol or tryptacap-hydrochloride or tryptine or tryptizol or trytomer or vanatrip).mp.                                                                                                                                                                                                                                                                                                                                                                                                                                                                                                                                                                                                                                                                                                                                                                                                                                                                                                                                                                                                                                                                                                                                                                                        |
| 68 | (aleve or anaprox or flanax or maxidol or mediproxen or naprelan or naprosyn or naproxen).mp.                                                                                                                                                                                                                                                                                                                                                                                                                                                                                                                                                                                                                                                                                                                                                                                                                                                                                                                                                                                                                                                                                                                                                                                                                                                      |
| 69 | (aleviatin or auranile or causoin or cerebyx or comitoina or convul or danten or dantinal or dantoinal or dantoine or denyl or di-hydan or di-lan or di-phetine or difenilhidantoina or difenin or difetoin or difhydan or dihycon or dihydantoin or dilabid or dilantin* or dillantoin or dintoin or dintoina or diphantoin or diphedal or diphedan or diphenin or diphenine or diphentyn or diphenylan or dyphenylhydantoin* or diphenylhydantoin or ditoinate or ekko or elepsindon or enkelfel or epamin or epdantoin or epelin or epifenyl or epihydan or epilan-d or epilantin or epinat or epised or eptal or fenantoin or fenidantoin or fenitoina or fentoin or fenylepsin or fenytoin* or fosphenytoin-sodium or hidan or hidantal or hidantilo or hidantina or hidantomin or hydantal or hydantoinal or ictalis-simple or idantoil or iphenylhydantoin or kessodanten or labopal or lehydan or leptoain or lepsin or mesantoin or minetoin or neosidantoina or novantoina or novophenytain or oxylan or phanantin or phanatine or phenatine or phenatoine or phenhydanin or phentoin or phentytoin or phenytek or phenytex or phenytoin* or ritmenal or saceril or sanepil or silantin or sinergina or sodanthon or sodantoin or sodanton or solantin or sylantoinc or thilophenyl or toin or tremytoine or zentropal or zentropil).mp. |
| 70 | (alganex or liman or mobiflex or octiveran or rexalgan or tenoxicam* or tilcotil).mp.                                                                                                                                                                                                                                                                                                                                                                                                                                                                                                                                                                                                                                                                                                                                                                                                                                                                                                                                                                                                                                                                                                                                                                                                                                                              |
| 71 | (alгимabo or algirona or algopyrin or alnex or analgin or analgina or analgine or antalgine or antalgina or causalon or conmel or cornalgin or defin or di-shuang or dialgin or diprin or dolanet or dolemicin or dolgan or dolocalma or foragin or hexalgin or laper or magnopyrol or metamizol* or metazol or minalgin or natralgin or nolotil or novalcina or novalgin or novalgina or novalgine or novalgine or optalgin or proalgin or promel or sinalgia or taxenil or telalgin or v-dalgin).mp.                                                                                                                                                                                                                                                                                                                                                                                                                                                                                                                                                                                                                                                                                                                                                                                                                                             |
| 72 | (alphatrex or beta-val or betacort or betaderm or betagel or betaject or betamethasone or betamycin or betaprolene or betaprone or betatrex or beteflam or betnesol or betnovate or celestone or celestroderm or dermabet or diprogen or diprolene or diprosalic or diprosone or dovobet or ectosone or enstilar or lotriderm or lotrisone or luxiq or prevex-b or pro-sone or sernivo or taclonex or uticort or valisone or valnac).mp.                                                                                                                                                                                                                                                                                                                                                                                                                                                                                                                                                                                                                                                                                                                                                                                                                                                                                                           |
| 73 | (amizepin* or bipotrol or biston or carbamazepin* or carbamazepin* or carbatrol or carbazepin* or carnexiv or epitol or equetro or finlepsin or karbamazepin or neurotol or stazepine or tegretal or tegretol or telesmin or teril or timonil).mp.                                                                                                                                                                                                                                                                                                                                                                                                                                                                                                                                                                                                                                                                                                                                                                                                                                                                                                                                                                                                                                                                                                 |
| 74 | (amrix or cyclobenzaprin* or fexmid or flexeril or lissiril or proeptatriene or proheptatrien*).mp.                                                                                                                                                                                                                                                                                                                                                                                                                                                                                                                                                                                                                                                                                                                                                                                                                                                                                                                                                                                                                                                                                                                                                                                                                                                |
| 75 | (anti-inflammatory-analges* or antiinflammatory-analges*).tw,kf.                                                                                                                                                                                                                                                                                                                                                                                                                                                                                                                                                                                                                                                                                                                                                                                                                                                                                                                                                                                                                                                                                                                                                                                                                                                                                   |
| 76 | (arcoxia or etoricoxib* or etoxib or etropain or kingcox or tauxib or torcoxia).mp.                                                                                                                                                                                                                                                                                                                                                                                                                                                                                                                                                                                                                                                                                                                                                                                                                                                                                                                                                                                                                                                                                                                                                                                                                                                                |
| 77 | (aricclaim or cymbalta or duloxetine or xeristar or yentreve).mp.                                                                                                                                                                                                                                                                                                                                                                                                                                                                                                                                                                                                                                                                                                                                                                                                                                                                                                                                                                                                                                                                                                                                                                                                                                                                                  |
| 78 | (aristospan or kenalog or triamcinolone or zilretta).mp.                                                                                                                                                                                                                                                                                                                                                                                                                                                                                                                                                                                                                                                                                                                                                                                                                                                                                                                                                                                                                                                                                                                                                                                                                                                                                           |
| 79 | (arthaxan or balmox or consolan or dolsinal or flambate or listran or mebutan or nabumeton* or prodac or relafen or relif or relifen or relifex or unimetone).mp.                                                                                                                                                                                                                                                                                                                                                                                                                                                                                                                                                                                                                                                                                                                                                                                                                                                                                                                                                                                                                                                                                                                                                                                  |
| 80 | (arthrotec or diclofenac or dyloject or flector or pennsaid or solaraze or voltaren or zipsor or zorvolex).mp.                                                                                                                                                                                                                                                                                                                                                                                                                                                                                                                                                                                                                                                                                                                                                                                                                                                                                                                                                                                                                                                                                                                                                                                                                                     |
| 81 | (ateven or avantyl or aventyl or demethylamitriptyline or demethylamitriptyline or desitriptilina or desmethylamitriptyline or lumbeck or noramitriptyline or noritren or nortroptilina or nortriptylin* or nortryptilin* or nortryptilin* or norventyl or pamelor or sensaval).mp.                                                                                                                                                                                                                                                                                                                                                                                                                                                                                                                                                                                                                                                                                                                                                                                                                                                                                                                                                                                                                                                                |
| 82 | (avetil or axacet or axisal or axum or delaxin or etroflex or forbaxin or lumirelax or methocal or methocarbamol* or methoxacet or methoxisal or metocarbamol* or metofenia or miolaxene or miorilas or miowas or myolaxene or neuraxin or parabaxin or perilax or reflexyn or relaxophen or relestrif or robax or robaxacet or robaximol or robaxin or robaxisal or robinax or romethocarb or spasmhalt or surquetil or tresortil).mp.                                                                                                                                                                                                                                                                                                                                                                                                                                                                                                                                                                                                                                                                                                                                                                                                                                                                                                            |
| 83 | (baclofen* or gablofen* or kemstro or lioresal).mp.                                                                                                                                                                                                                                                                                                                                                                                                                                                                                                                                                                                                                                                                                                                                                                                                                                                                                                                                                                                                                                                                                                                                                                                                                                                                                                |
| 84 | (bupivacaine or exparel or marcaine or sensorcaine or vivacaine).mp.                                                                                                                                                                                                                                                                                                                                                                                                                                                                                                                                                                                                                                                                                                                                                                                                                                                                                                                                                                                                                                                                                                                                                                                                                                                                               |
| 85 | (carbocaine or mepivacaine or polocaine or scandonest).mp.                                                                                                                                                                                                                                                                                                                                                                                                                                                                                                                                                                                                                                                                                                                                                                                                                                                                                                                                                                                                                                                                                                                                                                                                                                                                                         |

|     |                                                                                                                                                                              |
|-----|------------------------------------------------------------------------------------------------------------------------------------------------------------------------------|
| 86  | (catapres or clonidine or clorpres or duraclon or kapvay).mp.                                                                                                                |
| 87  | (celebrex or celecox*).mp.                                                                                                                                                   |
| 88  | (chlorprocaine or procaine).mp.                                                                                                                                              |
| 89  | (corticoid* or corticosteroid* or cortico-steroid*).tw,kf.                                                                                                                   |
| 90  | (coxflam or coxicam or maxicam or melfax or melonex or meloxicam* or meloxivet or metacam or mobec or mobic or mobicox or movalis or movatec or revmoksikam or vivlodex).mp. |
| 91  | (daypro or deflam or oxaprozin*).mp.                                                                                                                                         |
| 92  | (demethylimipramine or desimipramine or desipramin* or desmethylimipramine or dezipramine or dimethylimipramine or norimipramine or norpramin or pertofrane).mp.             |
| 93  | (desvenlafaxine or effexor or elafax or khedezla or pristiq or venlafaxin*).mp.                                                                                              |
| 94  | (dexmedetomidine or precedex).mp.                                                                                                                                            |
| 95  | diflunisal.mp.                                                                                                                                                               |
| 96  | (epitomax or qsymia or qudexy or tipiramat* or topamax or topax or topiragen or topiramat* or trokendi).mp.                                                                  |
| 97  | (feldene or piroxicam).mp.                                                                                                                                                   |
| 98  | (fenoprofen or nalfon).mp.                                                                                                                                                   |
| 99  | flurbiprofen.mp.                                                                                                                                                             |
| 100 | (frotek or ketoprofen).mp.                                                                                                                                                   |
| 101 | (gabapentin* or gralise or horizant or neurontin).mp.                                                                                                                        |
| 102 | (gabatril or gabitril or tiagabine).mp.                                                                                                                                      |
| 103 | (indocin or indomethacin or novo-methacin or pro-indo or tivorbex).mp.                                                                                                       |
| 104 | (ketalar or ketamine).mp.                                                                                                                                                    |
| 105 | (lidocaine or xylocaine or xylocard).mp.                                                                                                                                     |
| 106 | (local-infiltration adj2 analgesia).tw,kf.                                                                                                                                   |
| 107 | (lumiracoxib or prexige).mp.                                                                                                                                                 |
| 108 | (lyrica or pregabalin).mp.                                                                                                                                                   |
| 109 | (mefenamic-acid or ponstan or ponstel).mp.                                                                                                                                   |
| 110 | (metassalone or metaxalon* or skelaxin or zorane).mp.                                                                                                                        |
| 111 | (narcotic*-free or narcotic*-less or narcotic*-spar* or non-narcotic* or non-opioid*).tw,kf.                                                                                 |
| 112 | (narop or naropin or noropine or ropivacain*).mp.                                                                                                                            |
| 113 | (nonsteroidal-antiinflammatory or nonsteroidal-anti-inflammatory or non-steroidal-antiinflammatory or non-steroidal-anti-inflammatory or nsaid*).tw,kf.                      |
| 114 | (opiat*-free or opiat*-less or opiat*-spar* or opioid*-free or opioid*-less or opioid*-spar*).tw,kf.                                                                         |
| 115 | (oxcarbazepin* or oxtellar or timox or trileptal).mp.                                                                                                                        |
| 116 | parecoxib.mp.                                                                                                                                                                |
| 117 | (prialt or ziconotide).mp.                                                                                                                                                   |
| 118 | (sirdalud or ternelin or tizanidin* or zanaflex).mp.                                                                                                                         |
| 119 | or/10-118                                                                                                                                                                    |
| 120 | 9 and 119                                                                                                                                                                    |
| 121 | Alfentanil/                                                                                                                                                                  |
| 122 | exp Analgesics, Opioid/                                                                                                                                                      |
| 123 | Buprenorphine/                                                                                                                                                               |
| 124 | Butorphanol/                                                                                                                                                                 |
| 125 | Codeine/                                                                                                                                                                     |
| 126 | Dextropropoxyphene/                                                                                                                                                          |
| 127 | Fentanyl/                                                                                                                                                                    |



|     |                                                                                                                                                                                                                                                                                                                                                                                                                                                                                                                                                                                                                                                                                                                                                                                                                                                                                                                                                                                                                                                                                                                                                  |
|-----|--------------------------------------------------------------------------------------------------------------------------------------------------------------------------------------------------------------------------------------------------------------------------------------------------------------------------------------------------------------------------------------------------------------------------------------------------------------------------------------------------------------------------------------------------------------------------------------------------------------------------------------------------------------------------------------------------------------------------------------------------------------------------------------------------------------------------------------------------------------------------------------------------------------------------------------------------------------------------------------------------------------------------------------------------------------------------------------------------------------------------------------------------|
| 128 | Hydrocodone/                                                                                                                                                                                                                                                                                                                                                                                                                                                                                                                                                                                                                                                                                                                                                                                                                                                                                                                                                                                                                                                                                                                                     |
| 129 | Hydromorphone/                                                                                                                                                                                                                                                                                                                                                                                                                                                                                                                                                                                                                                                                                                                                                                                                                                                                                                                                                                                                                                                                                                                                   |
| 130 | Meperidine/                                                                                                                                                                                                                                                                                                                                                                                                                                                                                                                                                                                                                                                                                                                                                                                                                                                                                                                                                                                                                                                                                                                                      |
| 131 | Methadone/                                                                                                                                                                                                                                                                                                                                                                                                                                                                                                                                                                                                                                                                                                                                                                                                                                                                                                                                                                                                                                                                                                                                       |
| 132 | Morphine/                                                                                                                                                                                                                                                                                                                                                                                                                                                                                                                                                                                                                                                                                                                                                                                                                                                                                                                                                                                                                                                                                                                                        |
| 133 | Morphine Derivatives/                                                                                                                                                                                                                                                                                                                                                                                                                                                                                                                                                                                                                                                                                                                                                                                                                                                                                                                                                                                                                                                                                                                            |
| 134 | Nalbuphine/                                                                                                                                                                                                                                                                                                                                                                                                                                                                                                                                                                                                                                                                                                                                                                                                                                                                                                                                                                                                                                                                                                                                      |
| 135 | Oxycodone/                                                                                                                                                                                                                                                                                                                                                                                                                                                                                                                                                                                                                                                                                                                                                                                                                                                                                                                                                                                                                                                                                                                                       |
| 136 | Pentazocine/                                                                                                                                                                                                                                                                                                                                                                                                                                                                                                                                                                                                                                                                                                                                                                                                                                                                                                                                                                                                                                                                                                                                     |
| 137 | Pirinitramide/                                                                                                                                                                                                                                                                                                                                                                                                                                                                                                                                                                                                                                                                                                                                                                                                                                                                                                                                                                                                                                                                                                                                   |
| 138 | Remifentanil/                                                                                                                                                                                                                                                                                                                                                                                                                                                                                                                                                                                                                                                                                                                                                                                                                                                                                                                                                                                                                                                                                                                                    |
| 139 | Sufentanil/                                                                                                                                                                                                                                                                                                                                                                                                                                                                                                                                                                                                                                                                                                                                                                                                                                                                                                                                                                                                                                                                                                                                      |
| 140 | Tramadol/                                                                                                                                                                                                                                                                                                                                                                                                                                                                                                                                                                                                                                                                                                                                                                                                                                                                                                                                                                                                                                                                                                                                        |
| 141 | (Abalgin or Adalgin or Algafan or Algaphan or Algodin or Antalvic or Daloxen or Darvocet or Darvon or Deprancol or Deprandol or Depromic or Depronol or Destropropossifene or Develin or Dextropropoxifeno or Dextropropoxyphen* or Dextroproxifeno or Dimeprotane-hydrochloride or Dolan or Dolene or Dolorphe or Doloxene or Doloxyne or Femadol or Kesso-gesic or Levitan or Leviton or Liberan or Piril or Pro-gesic or Prophene-65 or Propoxyphen* or Propoxyphine or Proxagesic or Proxyvon or Regredol or Tawasan).mp.                                                                                                                                                                                                                                                                                                                                                                                                                                                                                                                                                                                                                    |
| 142 | (Abstral or Actiq or Duragesic or Durogesic or Durotep or Epufen or Fentalis or Fentamyl or Fentane* or Fentanil* or Fentanyl* or Fentora or Innovar or Instanyl or Ionsys or Lazanda or Leptanal or Matrifen or Mezolar or Onsolis or PecFent or Phentanyl or Rapinyl or Recuvyra or Sentonil or Sublimase or Sublimaze or Subsys or Tanyl or Transfenta).mp.                                                                                                                                                                                                                                                                                                                                                                                                                                                                                                                                                                                                                                                                                                                                                                                   |
| 143 | (Acetazone or Ambenyl or Ardinex or Atasol or Bromanyl or Calmylin or Codein* or Codeprex or Codicaps or Codipertussin or Codrix or Codyl or Cotridin or Isocodeine or Mersyndol or Methylnormine or Methylnormine or Procet or Robaxacet or Robaxisal or Synalgos or Trezix or Trianal or Triatec).mp.                                                                                                                                                                                                                                                                                                                                                                                                                                                                                                                                                                                                                                                                                                                                                                                                                                          |
| 144 | (Actiskenan or Algedol or Anafil or Arymo or Astramorph or Avinza or Contalgin or Depodur or Depomorphine or Dolcontin or Doloral or Duralmor or Duramorph or Embeda or Ethirfin or Graten or Infumorph or Kadian or Kapanol or Longphine or M-Ediat or Meslon or M-Eslon or Mitigo or Moraxen or Morcontin or Morficontin or Morphabond or Morphanton or Morphgesic or Morphia or Morphine* or Moscontin or MS-Contin or M-S-Contin or Noceptin or Oblioser or Oramorph or Rapi-ject or Relimal or Roxanol or Rylomine or Sevredol or Skenan or S-morphine or Statex or Vendal or Zomorph).mp.                                                                                                                                                                                                                                                                                                                                                                                                                                                                                                                                                  |
| 145 | (Adamon or Adolonta or Amadol or Analab or Analdol or Andalpa or Bellatram or Biodalgic or Biokanol or Biomadol or Calmol or Contramid or Contramal or Con-zip or Conzip or Dolana or Dolika or Dolmal or Dolotral or Dolzam or Dromadol or Durela or Eufindol or Exopen or Jutadol or Katrasic or Kontram or Labesfal or Mabron or Melanate or Mosepan or Newdorphan or Nobligan or Nonalges or Omnidol or Pengesic or Prontofort or Radol or Ralivia or Ranitidin or Rofy or Rybix or Ryzolt or Sefmal or Sensitram or Takadol or Tamolan or Tandol or Tarol or Theradol or Tiparol or Tiral or Topalgic or Trabar or Trabilan or Trabilin or Tradol* or Tradona or Tralgiol or Tralic or Tramabeta or Tramacet or Tramada or Tramadex or Trama-dorsch or Tramadi* or Tramado* or Tramadura or Tramagetic or Tramagit or Tramahexal or Tramake or Tramal or Tramaliv or Tramazac or Tramed or Tramex or Tramol or Tramundin or Trapidol or Trasedal or Trasik or Trexol or Tridol or Tridural or Trodon or Trondon or Ultracet or Ultram or Unitral or Urgendol or Zamadol or Zamudol or Zodal or Zumalgic or Zumatran or Zydol or Zytram).mp. |
| 146 | (Adanon or Algidon or Algolysin or Algovetin or Algoxale or Althose or Amidon* or Amidosan or Anadon or Biodone or Butalgin or Cophylac or Deamin or Depridol or Diaminon or Dianone or Dolafin or Dolamid or Dolesone or Dolmed or Dolophin* or Dorex or Dorexol or Eptadone or Fenadon or Gobbidona or Heptadon* or Heptanon or Ketalgin or Mecodin or Mepecton or                                                                                                                                                                                                                                                                                                                                                                                                                                                                                                                                                                                                                                                                                                                                                                             |

|     |                                                                                                                                                                                                                                                                                                                                                                                                                                                                                                                                                                                                                                                                                                                                                                                                                                                                                                                                                                                                                                                                                                                                                                                                                                |
|-----|--------------------------------------------------------------------------------------------------------------------------------------------------------------------------------------------------------------------------------------------------------------------------------------------------------------------------------------------------------------------------------------------------------------------------------------------------------------------------------------------------------------------------------------------------------------------------------------------------------------------------------------------------------------------------------------------------------------------------------------------------------------------------------------------------------------------------------------------------------------------------------------------------------------------------------------------------------------------------------------------------------------------------------------------------------------------------------------------------------------------------------------------------------------------------------------------------------------------------------|
|     | Mephenon or Metadol or Metadon* or Metasedin or Methaddict or Methadon* or Methadose or Methaforte mix or Miadone or Moheptan or Pallidone or Phenadon* or Physepton* or Polamidon or Polamivet or Polamivit or Sedo-Rapide or Sinalgin or Symoron or Westadone).mp.                                                                                                                                                                                                                                                                                                                                                                                                                                                                                                                                                                                                                                                                                                                                                                                                                                                                                                                                                           |
| 147 | (Allay or Anexsia or Apadaz or Azdone or Bancap or Bekadid or Codamine or Codinovo or CO-GESIC or Dico or Dicotid or Dihydrocodeinone or Dihydrocodone or Duradyne-DHC or Flowtuss or Hidrocodona or Hycodan or Hycofenix or Hycon or Hydrocodeinonebitartrate or Hydrocodon* or Hydrocon* or Hydropane or Hy-Phen or Hysingla or Idrocodone or Lorcet-HD or Lortab or Multacodin or Norcet or Norco or Obredon or Reprexain or Rezira or Robidone or Tussicaps or Tussignon or Tussionex or Tycolet or Vantrela-ER or Vicodin or Vicoprin or Vicoprofen or Vituz or Xtrelus or Zohydro or Zutripro or Zydone).mp.                                                                                                                                                                                                                                                                                                                                                                                                                                                                                                                                                                                                             |
| 148 | (Alfenil or Alfenta or Alfentanil* or Alfentanyl or Brevafen or Fanaxal or Limifen or Rapifen).mp.                                                                                                                                                                                                                                                                                                                                                                                                                                                                                                                                                                                                                                                                                                                                                                                                                                                                                                                                                                                                                                                                                                                             |
| 149 | (Algil or Alodan or Atropine or Centralgin* or Cluyer or Demero* or Dispadol or Dolanquifa or Dolantal or Dolantin* or Dolargan or Dolcontral or Dolestin* or Dolin or Dolocontral or Doloneurin or Doloneutrotat or Dolosal or Dolosan or Dolsin or Dolvanol or Endolate or Isonipecaïn* or Lidol or Lydol or Mefedina or Mepadin or Meperdol or Mepergan or Meperiden or Meperidin* or Meperidol or Mephedine or Mepiridine or Mialgin or Nemerol or Neomochin or Operidine or Opistan or Pantalgin or Petadin or Petantin* or Pethanol or Pethedine or Pethidin* or Petidin* or Petydyna or Phetidine or Pipersal or Piridosal or Sauteralgyl or Supposal or Synlaudine).mp.                                                                                                                                                                                                                                                                                                                                                                                                                                                                                                                                                |
| 150 | (Anorfin or Belbuca or Bunavail or Buprenex or Buprenorfin* or Buprenorphin* or Buprex or Buprine or Butrans or Cassipa or Finibron or Norphin or Pentorel or Prefin or Probuphenine or Probuphine or Somnena or Sublocade or Suboxone or Subutex or Temgesic or Transtec or Vetergesic or Zubsolv).mp.                                                                                                                                                                                                                                                                                                                                                                                                                                                                                                                                                                                                                                                                                                                                                                                                                                                                                                                        |
| 151 | (Avridi or Bionine or Bionone or Bolodorm or Broncodal or Bucodal or Cafacodal or Cardanon or Codeinone or Codenon or Codix-5 or Codoxy or Combunox or Dihydrohydroxycodoneinone or Dihydrohydroxydodeinone or Dihydrone or Dihydroxycodoneinone or Dinarkon or Diphydrone or Endine or Endone or Eubine or Eucodal* or Eudin or Eukdin or Eukodal or Eumorphal or Eurodamine or Eutagen or Hydrocodal or Hydroxycodonein* or Ludonal or Medicodal or M-oxy or Narcobasin* or Narcosin or Nargenol or Narodal or Nucodan or Opton or Ossicodone or Oxanest or Oxaydo or Oxecta or Oxiconona or Oxicon or Oxicone or Oxicontin or Oxiconum or Oxikon or Oxy-ir or Oxycet or Oxycocet or Oxycod or Oxycodan or Oxycodonein* or Oxycodon* or Oxycodyl or Oxycone or Oxycontin or Oxydose or Oxyfast or Oxygesic or OxyIR or Oxykon or OxyNEO or Oxynorm or Pancodine or Pancodone or Pavinal or Percobarb or Percocet or Percodan or Percolone or Pronarcin or Remoxy or Roxicet or Roxicodone or Roxilox or Roxiprin or Roxybond or Roxycodone or Sinthiodal or Stupenal or Suspendol or Supeudol or Targin or Targiniq or Tebodal or Tekodin or Thecodin or Theocodin or Troxyca or Tylox or Xartemis or Xtampa or Xtampza).mp. |
| 152 | (Beforal or Butorfanol or Butorphanol or Butorphanolum or Dolorex or Moradol or Stadol).mp.                                                                                                                                                                                                                                                                                                                                                                                                                                                                                                                                                                                                                                                                                                                                                                                                                                                                                                                                                                                                                                                                                                                                    |
| 153 | (Biomorphyl or Cofalaudid or Dihydromorfinon or Dihydromorfinone or Dihydromorphone or Dilaudid or DiMo or Dimorphone or Dolonovag or Exalgo or Hidromorfona or Hydral or Hydromorfona or Hydromorph-Contin or Hydromorfinone-hydrochloride or Hydromorphon* or Hydrostat-ir or Hymorphan or Idromorfone or Jurnista or Laudacon* or Novolaudon or Opidol or Paliadon or Palladon* or Rexaphon or Semcox or Sophidone).mp.                                                                                                                                                                                                                                                                                                                                                                                                                                                                                                                                                                                                                                                                                                                                                                                                     |
| 154 | (Chronogesic or DSUVIA or Fentathianyl or Fentathienyl or Fentatienil or Sufenta or Sufentanil* or Sufentanyl).mp.                                                                                                                                                                                                                                                                                                                                                                                                                                                                                                                                                                                                                                                                                                                                                                                                                                                                                                                                                                                                                                                                                                             |
| 155 | (Dipidolor or Dipiritramide or Dipydolor or Piridolan or Pirinitramide or Piritramid* or Pyritramide).mp.                                                                                                                                                                                                                                                                                                                                                                                                                                                                                                                                                                                                                                                                                                                                                                                                                                                                                                                                                                                                                                                                                                                      |
| 156 | (Dolapent or Fortal or Fortalgescic or Fortalin or Fortral or Fortraline or Fortwin or Lexir or Liticon or Peltazon or Pentacozine or Pentafen or Pentagin or Pentalgina or Pentazocin* or Pentozocine or Perutagin or Sosegon or Sosigon or TALACEN or Talioin or Talwin).mp.                                                                                                                                                                                                                                                                                                                                                                                                                                                                                                                                                                                                                                                                                                                                                                                                                                                                                                                                                 |
| 157 | (Nalbufin* or Nalbuphin* or Nalcryn or Nalpain or Nubain* or Onfor).mp.                                                                                                                                                                                                                                                                                                                                                                                                                                                                                                                                                                                                                                                                                                                                                                                                                                                                                                                                                                                                                                                                                                                                                        |
| 158 | (Nicomorfin* or Nicomorphin* or Vilan).mp.                                                                                                                                                                                                                                                                                                                                                                                                                                                                                                                                                                                                                                                                                                                                                                                                                                                                                                                                                                                                                                                                                                                                                                                     |

|     |                                                                                                                                                                                                                                                                                                        |
|-----|--------------------------------------------------------------------------------------------------------------------------------------------------------------------------------------------------------------------------------------------------------------------------------------------------------|
| 159 | (Remifentanil or Remifentanyl or Ultiva).mp.                                                                                                                                                                                                                                                           |
| 160 | or/121-159                                                                                                                                                                                                                                                                                             |
| 161 | 120 and 160                                                                                                                                                                                                                                                                                            |
| 162 | Animals/ not (Animals/ and Humans/)                                                                                                                                                                                                                                                                    |
| 163 | Disease models, animal/ or Models, animal/                                                                                                                                                                                                                                                             |
| 164 | ((animal or animals or canine* or cat or cats or dog or dogs or feline or hamster* or lamb or lambs or mice or monkey or monkeys or mouse or murine or pig or pigs or piglet* or porcine or primate* or rabbit* or rats or rat or rodent* or sheep* or veterinar*) not (human* or patient*)).ti,kf,jw. |
| 165 | or/162-164                                                                                                                                                                                                                                                                                             |
| 166 | 161 not 165                                                                                                                                                                                                                                                                                            |
| 167 | (exp child/ or exp infant/) not (adolescent/ or exp adult/)                                                                                                                                                                                                                                            |
| 168 | (baby or babies or boy* or child* or fetus or fetal or foet* or girl* or juvenile* or kid or kids or infan* or newborn* or new-born* or neonat* or neo-nat* or paediatr* or pediater* or preadolesc* or prepubesc* or preteen* or pubescen* or toddler* or youth*).ti,jw.                              |
| 169 | 167 or 168                                                                                                                                                                                                                                                                                             |
| 170 | 166 not 169                                                                                                                                                                                                                                                                                            |
| 171 | Clinical trials as topic/                                                                                                                                                                                                                                                                              |
| 172 | Controlled clinical trial/                                                                                                                                                                                                                                                                             |
| 173 | Randomized controlled trial/                                                                                                                                                                                                                                                                           |
| 174 | (placebo or randomized or randomly).tw.                                                                                                                                                                                                                                                                |
| 175 | trial.ti.                                                                                                                                                                                                                                                                                              |
| 176 | 171 or 172 or 173 or 174 or 175                                                                                                                                                                                                                                                                        |
| 177 | 170 and 176                                                                                                                                                                                                                                                                                            |

Following peer review, age filter was revised to retrieve articles from pediatric journals and studies including pediatric patients.

The queries at lines 167 and 168 of the original strategy were modified as follows:

**167** (exp child/ or exp infant/) not (adolescent/ or exp adult/)

**168** (baby or babies or boy\* or fetus or fetal or foet\* or girl\* or kid or kids or infan\* or newborn\* or new-born\* or neonat\* or neo-nat\* or preadolesc\* or prepubesc\* or preteen\* or pubescen\* or toddler\*).ti,jw.

## Supplement 2. Abstract screening decision tables

### I. Any Study

| Characteristics                                                                                                                                                               | Decision       |
|-------------------------------------------------------------------------------------------------------------------------------------------------------------------------------|----------------|
| Studies where the experimental design was <b>clearly</b> not a parallel randomized controlled trial (e.g. retrospective studies, historically controlled studies)             | <b>Exclude</b> |
| Narrative review (commentaries, letters and editorials), systematic reviews, meta analyses                                                                                    | <b>Exclude</b> |
| Did not assess interventions for postoperative pain management                                                                                                                | <b>Exclude</b> |
| Were conducted in animals                                                                                                                                                     | <b>Exclude</b> |
| Involved only pediatric patients                                                                                                                                              | <b>Exclude</b> |
| Analgesia regimens compared were <u>exclusively pre-operative</u> (e.g. preemptive gabapentin), with no indication that post-discharge analgesia was different between groups | <b>Exclude</b> |
| Analgesia regimens compared were <u>exclusively intra-operative</u> (e.g. nerve blocks), with no indication that post-discharge analgesia was different between groups        | <b>Exclude</b> |
| Analgesia regimen was offered <u>exclusively during hospital stay</u> (e.g. PCA, epidural), with no indication that post-discharge analgesia was different between groups     | <b>Exclude</b> |
| Involved analgesia treatment <u>exclusively for chronic postoperative pain</u> (i.e. the intervention started over 2 two months after surgery)                                | <b>Exclude</b> |

### II. Randomized trials involving post-discharge analgesia

| Primary analgesia regimen |                          |                                                                    | Rescue analgesia requiring a new prescription | Decision                |
|---------------------------|--------------------------|--------------------------------------------------------------------|-----------------------------------------------|-------------------------|
| Analgesia intervention 1  | Analgesia intervention 2 | Rescue analgesia readily available for patients (PRN prescription) |                                               |                         |
| Non-opioid (or placebo)   | Opioid                   | Non-opioid                                                         | Opioid OR Non-opioid OR Not used OR Unclear   | <b>Verify full-text</b> |
| Non-opioid (or placebo)   | Opioid                   | Not used                                                           | Opioid OR Non-opioid OR Not used OR Unclear   | <b>Verify full-text</b> |
| Non-opioid (or placebo)   | Opioid                   | Unclear                                                            | Opioid OR Non-opioid OR Not used OR Unclear   | <b>Verify full-text</b> |
| Non-opioid (or placebo)   | Opioid                   | Opioid                                                             | Opioid OR Non-opioid OR Not used OR Unclear   | <b>Exclude</b>          |
| Non-opioid                | Non-opioid (or placebo)  | Opioid OR Non-opioid OR Not used OR Unclear                        | Opioid OR Non-opioid OR Not used OR Unclear   | <b>Exclude</b>          |
| Opioid                    | Opioid                   | Opioid OR Non-opioid OR Not used OR Unclear                        | Opioid OR Non-opioid OR Not used OR Unclear   | <b>Exclude</b>          |

**Supplement 3. Data extraction form**

|                                                                                      |
|--------------------------------------------------------------------------------------|
| <b>A. STUDY IDENTIFICATION</b>                                                       |
| <b>STUDY DETAILS</b>                                                                 |
| <b>1. Sponsorship source:</b>                                                        |
| <b>2. Country:</b>                                                                   |
| <b>3. Setting:</b>                                                                   |
| <b>4. Comments:</b>                                                                  |
| <b>AUTHORS</b>                                                                       |
| <b>1. Author's name:</b>                                                             |
| <b>2. Institution:</b>                                                               |
| <b>3. Email:</b>                                                                     |
| <b>4. Address:</b>                                                                   |
| <b>ADDITIONAL INFORMATION</b>                                                        |
| <b>1. Article title:</b>                                                             |
| <b>2. Journal, year, volume, number and page:</b>                                    |
| <b>3. Key findings:</b>                                                              |
| <b>4. Publication source of study (peer reviewed or grey literature):</b>            |
| <b>5. Setting (university hospital, public hospital, private hospital database):</b> |
| <b>6. Study aim(s)/research question(s):</b>                                         |
| <b>7. Year of publication:</b>                                                       |

|    |                                                                                                                                             |
|----|---------------------------------------------------------------------------------------------------------------------------------------------|
| 1  |                                                                                                                                             |
| 2  |                                                                                                                                             |
| 3  |                                                                                                                                             |
| 4  | <b>B. METHODS</b>                                                                                                                           |
| 5  | <b>1. Study design:</b>                                                                                                                     |
| 6  |                                                                                                                                             |
| 7  | <b>2. Describe methodology briefly:</b>                                                                                                     |
| 8  |                                                                                                                                             |
| 9  |                                                                                                                                             |
| 10 |                                                                                                                                             |
| 11 | <b>3. Primary outcome:</b>                                                                                                                  |
| 12 |                                                                                                                                             |
| 13 |                                                                                                                                             |
| 14 | <b>4. Secondary outcomes:</b>                                                                                                               |
| 15 |                                                                                                                                             |
| 16 | <b>C. POPULATION</b>                                                                                                                        |
| 17 |                                                                                                                                             |
| 18 | <b>INCLUSION/ EXCLUSION CRITERIA</b>                                                                                                        |
| 19 |                                                                                                                                             |
| 20 | <b>1. Inclusion criteria:</b>                                                                                                               |
| 21 |                                                                                                                                             |
| 22 |                                                                                                                                             |
| 23 | <b>2. Exclusion criteria:</b>                                                                                                               |
| 24 |                                                                                                                                             |
| 25 |                                                                                                                                             |
| 26 | <b>3. Group differences:</b>                                                                                                                |
| 27 |                                                                                                                                             |
| 28 | <b>ADDITIONAL POPULATION DATA</b>                                                                                                           |
| 29 |                                                                                                                                             |
| 30 | <b>1. Describe the sample size calculation</b>                                                                                              |
| 31 |                                                                                                                                             |
| 32 |                                                                                                                                             |
| 33 | <b>2. Were patients removed from the trial when they reported no improvement, no adherence to treatment and/or adverse events? (Yes/No)</b> |
| 34 |                                                                                                                                             |
| 35 |                                                                                                                                             |
| 36 |                                                                                                                                             |
| 37 | <b>3. Was the study conducted in a single center or multiple centers?</b>                                                                   |
| 38 |                                                                                                                                             |
| 39 | <b>PATIENT CHARACTERISTICS</b>                                                                                                              |
| 40 |                                                                                                                                             |
| 41 |                                                                                                                                             |
| 42 | <b>1. Group label (e.g. opioid-free/based):</b>                                                                                             |
| 43 |                                                                                                                                             |
| 44 |                                                                                                                                             |
| 45 | <b>2. Sample size:</b>                                                                                                                      |
| 46 |                                                                                                                                             |
| 47 |                                                                                                                                             |
| 48 | <b>3. Number of patients randomized</b>                                                                                                     |
| 49 |                                                                                                                                             |
| 50 |                                                                                                                                             |
| 51 | <b>4. Number of patients analyzed</b>                                                                                                       |
| 52 |                                                                                                                                             |
| 53 |                                                                                                                                             |
| 54 | <b>5. Sex/gender (%F/%M):</b>                                                                                                               |
| 55 |                                                                                                                                             |
| 56 |                                                                                                                                             |
| 57 |                                                                                                                                             |
| 58 |                                                                                                                                             |
| 59 |                                                                                                                                             |
| 60 |                                                                                                                                             |

1  
2  
3  
4  
5  
6  
7  
8  
9  
10  
11  
12  
13  
14  
15  
16  
17  
18  
19  
20  
21  
22  
23  
24  
25  
26  
27  
28  
29  
30  
31  
32  
33  
34  
35  
36  
37  
38  
39  
40  
41  
42  
43  
44  
45  
46  
47  
48  
49  
50  
51  
52  
53  
54  
55  
56  
57  
58  
59  
60

**6. Mean (or median) age:**

**7. ASA class:**

**8. Comorbidities and risk factors:**

**9. Preoperative diagnosis, including percentages (if available):**

**10. Surgery, including percentages (e.g. knee replacement, hysterectomy, colectomy):**

**11. Surgical approach, including percentages (e.g. open, laparoscopic, arthroscopic):**

**12. Hospital length of stay (if means or medians not reported, please specify the target length of stay or indicate 'day surgery'):**

**13. Other characteristics of enrolled subjects (relevant to the study):**

#### **D. INTERVENTIONS**

**1. Group label (e.g. opioid-free/based):**

**2. Analgesia intervention before surgery (pre-emptive analgesia intervention initiated in the preoperative period), if any:**

**3. Analgesia and anesthesia interventions in the operating room (e.g. systemic drugs, peripheral nerve blocks, epidural, spinal analgesia and/or local infiltrations):**

**4. Analgesia intervention after surgery (in hospital):**

**5. Analgesia intervention after surgery (after hospital discharge):**

**6. Other relevant characteristics of the intervention(s), or comments:**

#### **E. OUTCOMES**

**1. Outcome name**

**2. Outcome type (e.g. continuous, dichotomous)**

- 1
- 2
- 3
- 4 **3. Reported as [e.g. mean ( $\pm$  SD), percentage, etc.]**
- 5
- 6
- 7 **4. Outcome group (i.e. primary, secondary)**
- 8
- 9
- 10 **5. Outcome reported (e.g. fully reported, not reported)**
- 11
- 12
- 13
- 14 **6. Scale**
- 15
- 16
- 17 **7. Range**
- 18
- 19
- 20 **8. Unit of measurement**
- 21
- 22
- 23 **9. Direction (e.g. lower is better, higher is better)**
- 24
- 25
- 26 **10. Notes**
- 27

For peer review only



**PRISMA-P (Preferred Reporting Items for Systematic review and Meta-Analysis Protocols) 2015 checklist: recommended items to address in a systematic review protocol\***

| Section and topic                 | Item No | Checklist item                                                                                                                                                                                                                | Reported on page # |
|-----------------------------------|---------|-------------------------------------------------------------------------------------------------------------------------------------------------------------------------------------------------------------------------------|--------------------|
| <b>ADMINISTRATIVE INFORMATION</b> |         |                                                                                                                                                                                                                               |                    |
| Title:                            |         |                                                                                                                                                                                                                               |                    |
| Identification                    | 1a      | Identify the report as a protocol of a systematic review                                                                                                                                                                      | p.1                |
| Update                            | 1b      | If the protocol is for an update of a previous systematic review, identify as such                                                                                                                                            | N/A                |
| Registration                      | 2       | If registered, provide the name of the registry (such as PROSPERO) and registration number                                                                                                                                    | N/A                |
| Authors:                          |         |                                                                                                                                                                                                                               |                    |
| Contact                           | 3a      | Provide name, institutional affiliation, e-mail address of all protocol authors; provide physical mailing address of corresponding author                                                                                     | p.1-2              |
| Contributions                     | 3b      | Describe contributions of protocol authors and identify the guarantor of the review                                                                                                                                           | p. 16              |
| Amendments                        | 4       | If the protocol represents an amendment of a previously completed or published protocol, identify as such and list changes; otherwise, state plan for documenting important protocol amendments                               | N/A                |
| Support:                          |         |                                                                                                                                                                                                                               |                    |
| Sources                           | 5a      | Indicate sources of financial or other support for the review                                                                                                                                                                 | N/A                |
| Sponsor                           | 5b      | Provide name for the review funder and/or sponsor                                                                                                                                                                             | N/A                |
| Role of sponsor or funder         | 5c      | Describe roles of funder(s), sponsor(s), and/or institution(s), if any, in developing the protocol                                                                                                                            | N/A                |
| <b>INTRODUCTION</b>               |         |                                                                                                                                                                                                                               |                    |
| Rationale                         | 6       | Describe the rationale for the review in the context of what is already known                                                                                                                                                 | p. 5               |
| Objectives                        | 7       | Provide an explicit statement of the question(s) the review will address with reference to participants, interventions, comparators, and outcomes (PICO)                                                                      | p. 6               |
| <b>METHODS</b>                    |         |                                                                                                                                                                                                                               |                    |
| Eligibility criteria              | 8       | Specify the study characteristics (such as PICO, study design, setting, time frame) and report characteristics (such as years considered, language, publication status) to be used as criteria for eligibility for the review | p. 7-8             |
| Information sources               | 9       | Describe all intended information sources (such as electronic databases, contact with study authors, trial registers or other grey literature sources) with planned dates of coverage                                         | p. 6-7             |
| Search strategy                   | 10      | Present draft of search strategy to be used for at least one electronic database, including planned limits, such that it could be repeated                                                                                    | Supplement 1       |

|                                    |     |                                                                                                                                                                                                                                                  |                   |
|------------------------------------|-----|--------------------------------------------------------------------------------------------------------------------------------------------------------------------------------------------------------------------------------------------------|-------------------|
| Study records:                     |     |                                                                                                                                                                                                                                                  |                   |
| Data management                    | 11a | Describe the mechanism(s) that will be used to manage records and data throughout the review                                                                                                                                                     | p. 9-11           |
| Selection process                  | 11b | State the process that will be used for selecting studies (such as two independent reviewers) through each phase of the review (that is, screening, eligibility and inclusion in meta-analysis)                                                  | p. 8-9            |
| Data collection process            | 11c | Describe planned method of extracting data from reports (such as piloting forms, done independently, in duplicate), any processes for obtaining and confirming data from investigators                                                           | p. 10-11          |
| Data items                         | 12  | List and define all variables for which data will be sought (such as PICO items, funding sources), any pre-planned data assumptions and simplifications                                                                                          | p. 9-10           |
| Outcomes and prioritization        | 13  | List and define all outcomes for which data will be sought, including prioritization of main and additional outcomes, with rationale                                                                                                             | p. 9-10           |
| Risk of bias in individual studies | 14  | Describe anticipated methods for assessing risk of bias of individual studies, including whether this will be done at the outcome or study level, or both; state how this information will be used in data synthesis                             | p. 11-12          |
| Data synthesis                     | 15a | Describe criteria under which study data will be quantitatively synthesised                                                                                                                                                                      | p. 12-13          |
|                                    | 15b | If data are appropriate for quantitative synthesis, describe planned summary measures, methods of handling data and methods of combining data from studies, including any planned exploration of consistency (such as $I^2$ , Kendall's $\tau$ ) | p. 14-15          |
|                                    | 15c | Describe any proposed additional analyses (such as sensitivity or subgroup analyses, meta-regression)                                                                                                                                            | p. 14-15          |
|                                    | 15d | If quantitative synthesis is not appropriate, describe the type of summary planned                                                                                                                                                               | N/A               |
| Meta-bias(es)                      | 16  | Specify any planned assessment of meta-bias(es) (such as publication bias across studies, selective reporting within studies)                                                                                                                    | p. 11-12          |
| Confidence in cumulative evidence  | 17  | Describe how the strength of the body of evidence will be assessed (such as GRADE)                                                                                                                                                               | p. 12 and Table 3 |

**\* It is strongly recommended that this checklist be read in conjunction with the PRISMA-P Explanation and Elaboration (cite when available) for important clarification on the items. Amendments to a review protocol should be tracked and dated. The copyright for PRISMA-P (including checklist) is held by the PRISMA-P Group and is distributed under a Creative Commons Attribution Licence 4.0.**

*From: Shamseer L, Moher D, Clarke M, Ghersi D, Liberati A, Petticrew M, Shekelle P, Stewart L, PRISMA-P Group. Preferred reporting items for systematic review and meta-analysis protocols (PRISMA-P) 2015: elaboration and explanation. BMJ. 2015 Jan 2;349(jan02 1):g7647.*
