# Supplementary material for: Opioid versus opioid-free analgesia after surgical discharge: protocol for a systematic review and meta-analysis
Source: PubMed Central journal article supplement — BMJ Open. 2020 Feb 2;10(1):e035443. doi: 10.1136/bmjopen-2019-035443 (PMC7045253; doi:10.1136/bmjopen-2019-035443), 2020-02-02
Supplement: bmjopen-2019-035443supp001.pdf [file bmjopen-2019-035443supp001.pdf]

# Supplementary Material

## Table of Contents

|                                                               |    |
|---------------------------------------------------------------|----|
| <b>Supplement 1. Medline search strategy</b> .....            | 2  |
| <b>Supplement 2. Abstract screening decision tables</b> ..... | 9  |
| <b>Supplement 3. Data extraction form</b> .....               | 10 |

**Supplement 1. Medline search strategy**

| #  | Searches                                                           |
|----|--------------------------------------------------------------------|
| 1  | Pain, Postoperative/                                               |
| 2  | Postoperative Care/                                                |
| 3  | Postoperative Period/                                              |
| 4  | ((after or following) adj3 (procedur* or resect* or surg*)),tw,kf. |
| 5  | (post-operat* or postoperat* or post-surg* or postsurg*)),tw,kf.   |
| 6  | or/2-5                                                             |
| 7  | (analgaes* or analges* or pain).tw,hw,kf.                          |
| 8  | 6 and 7                                                            |
| 9  | 1 or 8                                                             |
| 10 | Acetaminophen/                                                     |
| 11 | exp Adrenal Cortex Hormones/                                       |
| 12 | Amitriptyline/                                                     |
| 13 | exp Analgesics, Non-Narcotic/                                      |
| 14 | Anesthesia, Local/                                                 |
| 15 | exp Anesthetics, Local/                                            |
| 16 | exp Anticonvulsants/                                               |
| 17 | exp Anti-Inflammatory Agents, Non-Steroidal/                       |
| 18 | Aspirin/                                                           |
| 19 | Baclofen/                                                          |
| 20 | Bupivacaine/                                                       |
| 21 | Carbamazepine/                                                     |
| 22 | Celecoxib/                                                         |
| 23 | Clonidine/                                                         |
| 24 | exp Cyclooxygenase 2 Inhibitors/                                   |
| 25 | Desipramine/                                                       |
| 26 | Dexamethasone/                                                     |
| 27 | Dexmedetomidine/                                                   |
| 28 | Diclofenac/                                                        |
| 29 | Diflunisal/                                                        |
| 30 | Dipyrrone/                                                         |
| 31 | Duloxetine Hydrochloride/                                          |
| 32 | Fenoprofen/                                                        |
| 33 | Flurbiprofen/                                                      |
| 34 | Gabapentin/                                                        |
| 35 | gamma-Aminobutyric Acid/                                           |
| 36 | Ibuprofen/                                                         |
| 37 | Indomethacin/                                                      |
| 38 | Ketamine/                                                          |
| 39 | Ketoprofen/                                                        |
| 40 | Ketorolac/                                                         |
| 41 | Ketorolac Tromethamine/                                            |
| 42 | Lidocaine/                                                         |

|    |                                                                                                                                                                                                                                                                                                                                                                                                                                                                                                                                                                                                                                                                                                                                                                                                                                                                                                                                                                                                                |
|----|----------------------------------------------------------------------------------------------------------------------------------------------------------------------------------------------------------------------------------------------------------------------------------------------------------------------------------------------------------------------------------------------------------------------------------------------------------------------------------------------------------------------------------------------------------------------------------------------------------------------------------------------------------------------------------------------------------------------------------------------------------------------------------------------------------------------------------------------------------------------------------------------------------------------------------------------------------------------------------------------------------------|
| 43 | Mefenamic Acid/                                                                                                                                                                                                                                                                                                                                                                                                                                                                                                                                                                                                                                                                                                                                                                                                                                                                                                                                                                                                |
| 44 | Mepivacaine/                                                                                                                                                                                                                                                                                                                                                                                                                                                                                                                                                                                                                                                                                                                                                                                                                                                                                                                                                                                                   |
| 45 | Methocarbamol/                                                                                                                                                                                                                                                                                                                                                                                                                                                                                                                                                                                                                                                                                                                                                                                                                                                                                                                                                                                                 |
| 46 | Methylprednisolone/                                                                                                                                                                                                                                                                                                                                                                                                                                                                                                                                                                                                                                                                                                                                                                                                                                                                                                                                                                                            |
| 47 | Methylprednisolone Hemisuccinate/                                                                                                                                                                                                                                                                                                                                                                                                                                                                                                                                                                                                                                                                                                                                                                                                                                                                                                                                                                              |
| 48 | Naproxen/                                                                                                                                                                                                                                                                                                                                                                                                                                                                                                                                                                                                                                                                                                                                                                                                                                                                                                                                                                                                      |
| 49 | exp Neuromuscular Agents/                                                                                                                                                                                                                                                                                                                                                                                                                                                                                                                                                                                                                                                                                                                                                                                                                                                                                                                                                                                      |
| 50 | Nortriptyline/                                                                                                                                                                                                                                                                                                                                                                                                                                                                                                                                                                                                                                                                                                                                                                                                                                                                                                                                                                                                 |
| 51 | Phenytoin/                                                                                                                                                                                                                                                                                                                                                                                                                                                                                                                                                                                                                                                                                                                                                                                                                                                                                                                                                                                                     |
| 52 | Piroxicam/                                                                                                                                                                                                                                                                                                                                                                                                                                                                                                                                                                                                                                                                                                                                                                                                                                                                                                                                                                                                     |
| 53 | Prednisolone/                                                                                                                                                                                                                                                                                                                                                                                                                                                                                                                                                                                                                                                                                                                                                                                                                                                                                                                                                                                                  |
| 54 | Prednisone/                                                                                                                                                                                                                                                                                                                                                                                                                                                                                                                                                                                                                                                                                                                                                                                                                                                                                                                                                                                                    |
| 55 | Pregabalin/                                                                                                                                                                                                                                                                                                                                                                                                                                                                                                                                                                                                                                                                                                                                                                                                                                                                                                                                                                                                    |
| 56 | Prilocaine/                                                                                                                                                                                                                                                                                                                                                                                                                                                                                                                                                                                                                                                                                                                                                                                                                                                                                                                                                                                                    |
| 57 | Procaine/                                                                                                                                                                                                                                                                                                                                                                                                                                                                                                                                                                                                                                                                                                                                                                                                                                                                                                                                                                                                      |
| 58 | Triamcinolone/                                                                                                                                                                                                                                                                                                                                                                                                                                                                                                                                                                                                                                                                                                                                                                                                                                                                                                                                                                                                 |
| 59 | Triamcinolone Acetonide/                                                                                                                                                                                                                                                                                                                                                                                                                                                                                                                                                                                                                                                                                                                                                                                                                                                                                                                                                                                       |
| 60 | Venlafaxine Hydrochloride/                                                                                                                                                                                                                                                                                                                                                                                                                                                                                                                                                                                                                                                                                                                                                                                                                                                                                                                                                                                     |
| 61 | (a-methapred or artisone or besonia or dopomedrol or esametone or firmacort or lemod or medesone or medixon or medlone or medrate or m-predrol or medrol or medrone or mesopren or metastab or methyleneprednisolone or methylprednisolon* or metilbetasone or metilprednisolon* or metrisone or metrocort or moderin or nipypan or noretone or predni-n or prednisolone or prednol or promacortine or reactonol or sieropresol or solomet or solumedrol or summicort or suprametil or urbason* or wyacort).mp.                                                                                                                                                                                                                                                                                                                                                                                                                                                                                                |
| 62 | (acetaminophen or paracetamol or tylenol).mp.                                                                                                                                                                                                                                                                                                                                                                                                                                                                                                                                                                                                                                                                                                                                                                                                                                                                                                                                                                  |
| 63 | (acetylsalicylic-acid or aspirin).mp.                                                                                                                                                                                                                                                                                                                                                                                                                                                                                                                                                                                                                                                                                                                                                                                                                                                                                                                                                                          |
| 64 | (accuffix or aereoseb-dex or ciprodex or cresophene or decaderm or decadron or decaspray or dexacen or dexacort or dexair or dexamethasone or dexasone or dexasporin or dexone or dexycu or encor-dec or endomethasone or hexadrol or maxidex or maxitrol or neodecadron or neomycin or ozurdex or septomixine or tobradex or tobramycin).mp.                                                                                                                                                                                                                                                                                                                                                                                                                                                                                                                                                                                                                                                                  |
| 65 | (adasone or antocortone or betapar or bicortone or cartancyl or colisone or cortan or cortidelt or cotone or dacorten or dacortin or decortisyl or dellacort or delta-cortelan or delta-cortisone or deldadome or delta-e or delta-some or deltacordene or deltacortisone or deltacortone or deltasone or deltison* or deltra or di-adreson or diadreson or econosone or encorton* or fernisone or fiasone or hostacortin or in-sone or incocortyl or juvason or lisacort or lodotra or lodtra or me-korti or metacortandracin or meticorten or metreton or nisona or nizon or novoprednisone or nurison or orasone or panafcort or panasol or paracort or parmenison or pehacort or prerdeltin or prednicen or prednicorm or prednicort or prednicot or prednidib or prednilonga or prednison* or prednitone or prednizon or prednovister or presone or pronison or rayos or rectodelt or retrocortine or servisone or sone or sterapred or supercortil or ultracorten* or winpred or wojtab or zenadrid).mp. |
| 66 | (addaprin or advil or caldolor or dyspel or europrofen or genpril or i-prin or IBU-200 or ibuprofen or motrin or neoProfen or novo-profen or provil).mp.                                                                                                                                                                                                                                                                                                                                                                                                                                                                                                                                                                                                                                                                                                                                                                                                                                                       |
| 67 | (adepril or amavil or amilit or amineurin or amiplin or amiprin or amitid or amitril or amitrip or amitriptyline or amyline or amyzone or anapsique or annoylin or apo-peram or belpax or damilenehydrochloride or daprimen or deprex or domical or elatrol or elatrolet or elavil or enafon or endep or etrafon or etravil or kyliran or laroxyl or larozyl or lentizol or levate or levazine or limbitrol or maxivalet or miketorin or mitaptyline or normaln or novoprotect or novitriptyn or oasil-m or pinsanu or pinsaun or proavil or rantoron or redomex or saroten or sarotena or syneudon or teperin or                                                                                                                                                                                                                                                                                                                                                                                              |

|    |                                                                                                                                                                                                                                                                                                                                                                                                                                                                                                                                                                                                                                                                                                                                                                                                                                                                                                                                                                                                                                                                                                                                                                                                                                                                                                                                                |
|----|------------------------------------------------------------------------------------------------------------------------------------------------------------------------------------------------------------------------------------------------------------------------------------------------------------------------------------------------------------------------------------------------------------------------------------------------------------------------------------------------------------------------------------------------------------------------------------------------------------------------------------------------------------------------------------------------------------------------------------------------------------------------------------------------------------------------------------------------------------------------------------------------------------------------------------------------------------------------------------------------------------------------------------------------------------------------------------------------------------------------------------------------------------------------------------------------------------------------------------------------------------------------------------------------------------------------------------------------|
|    | trepiline or triavil or tridep or tripta or triptizol or triptyn or trynol or tryptacap-hydrochloride or tryptine or tryptizol or trytomer or vanatrip).mp.                                                                                                                                                                                                                                                                                                                                                                                                                                                                                                                                                                                                                                                                                                                                                                                                                                                                                                                                                                                                                                                                                                                                                                                    |
| 68 | (aleve or anaprox or flanax or maxidol or mediproxen or naprelan or naprosyn or naproxen).mp.                                                                                                                                                                                                                                                                                                                                                                                                                                                                                                                                                                                                                                                                                                                                                                                                                                                                                                                                                                                                                                                                                                                                                                                                                                                  |
| 69 | (aleviatin or auranile or causoin or cerebyx or comitoina or convul or danten or dantinal or dantoinal or dantoine or denyl or di-hydan or di-lan or di-phetine or difenilhidantoina or difenin or difetoin or difhydan or dihycon or dihydantoin or dilabid or dilantin* or dillantini or dintoin or dintoina or diphantoin or diphedal or diphedan or diphenin or diphenine or diphentyn or diphenylan or dyphenylhydantoin* or diphenylhydantoin or ditoinate or ekko or elepsindon or enkelfel or epamin or epdantoin or epelin or epifenyl or epihydan or epilan-d or epilantin or epinat or epised or eptal or fenantoin or fenidantoin or fenitoina or fentoin or fenylepsin or fenytoin* or fosphenytoin-sodium or hidan or hidantal or hidantilo or hidantina or hidantomin or hydantal or hydantoina or ictalis-simple or idantoin or iphenylhydantoin or kessodanten or labopal or lehydan or lepitoin or lepsin or mesantoin or minetoin or neosidantoina or novantoina or novophenytin or oxylan or phanantin or phanatine or phenatine or phenatoine or phenydanin or phentoin or phentytoin or phenytek or phenytek or phenytoin* or ritmenal or saceril or sanepil or silantin or sinergina or sodanthon or sodantoin or sodanton or solantin or sylantoin or thilophenyl or toin or tremytoine or zentropal or zentropil).mp. |
| 70 | (alganex or liman or mobiflex or octiveran or rexalgin or tenoxicam* or tilcotil).mp.                                                                                                                                                                                                                                                                                                                                                                                                                                                                                                                                                                                                                                                                                                                                                                                                                                                                                                                                                                                                                                                                                                                                                                                                                                                          |
| 71 | (alгимabo or algirona or algopyrin or alnex or analgin or analgina or analgine or antalgini or antalgina or causalon or commel or cornalgin or defin or di-shuang or dialgin or diprin or dolanet or dolemicin or dolgan or dolocalma or foragin or hexalgin or laper or magnopyrol or metamizol* or metazol or minalgin or natralgin or nolotil or novalcina or novalgin or novalgina or novalgine or optalgin or proalgin or promel or sinalgia or taxenil or telalgin or v-dalgin).mp.                                                                                                                                                                                                                                                                                                                                                                                                                                                                                                                                                                                                                                                                                                                                                                                                                                                      |
| 72 | (alphatrex or beta-val or betacort or betaderm or betagel or betaject or betamethasone or betamycin or betaprolene or betaprone or betatrex or beteflam or betnesol or betnovate or celestone or celestroderm or dermabet or diprogen or diprolene or diprosalic or diprosone or dovobet or ectosone or enstilar or lotriderm or lotrisone or luxiq or prevex-b or pro-sone or sernivo or taclonex or uticort or valisone or valnac).mp.                                                                                                                                                                                                                                                                                                                                                                                                                                                                                                                                                                                                                                                                                                                                                                                                                                                                                                       |
| 73 | (amizepin* or bipotrol or biston or carbamazepin* or carbamazepin* or carbatrol or carbazepin* or carnexiv or epitol or equetro or finlepsin or karbamazepin or neurotol or stazepine or tegretal or tegretol or telesmin or teril or timonil).mp.                                                                                                                                                                                                                                                                                                                                                                                                                                                                                                                                                                                                                                                                                                                                                                                                                                                                                                                                                                                                                                                                                             |
| 74 | (amrix or cyclobenzaprin* or fexmid or flexeril or lissiril or proeptatriene or proheptatrien*).mp.                                                                                                                                                                                                                                                                                                                                                                                                                                                                                                                                                                                                                                                                                                                                                                                                                                                                                                                                                                                                                                                                                                                                                                                                                                            |
| 75 | (anti-inflammatory-analges* or antiinflammatory-analges*).tw,kf.                                                                                                                                                                                                                                                                                                                                                                                                                                                                                                                                                                                                                                                                                                                                                                                                                                                                                                                                                                                                                                                                                                                                                                                                                                                                               |
| 76 | (arcoxia or etoricoxib* or etoxib or etropain or kingcox or tauxib or torcoxia).mp.                                                                                                                                                                                                                                                                                                                                                                                                                                                                                                                                                                                                                                                                                                                                                                                                                                                                                                                                                                                                                                                                                                                                                                                                                                                            |
| 77 | (ariclaim or cymbalta or duloxetine or xeristar or yentreve).mp.                                                                                                                                                                                                                                                                                                                                                                                                                                                                                                                                                                                                                                                                                                                                                                                                                                                                                                                                                                                                                                                                                                                                                                                                                                                                               |
| 78 | (aristospan or kenalog or triamcinolone or zilretta).mp.                                                                                                                                                                                                                                                                                                                                                                                                                                                                                                                                                                                                                                                                                                                                                                                                                                                                                                                                                                                                                                                                                                                                                                                                                                                                                       |
| 79 | (arthaxan or balmox or consolan or dolsinal or flambate or listran or mebutan or nabumeton* or prodac or relafen or relif or relifen or relifex or unimetone).mp.                                                                                                                                                                                                                                                                                                                                                                                                                                                                                                                                                                                                                                                                                                                                                                                                                                                                                                                                                                                                                                                                                                                                                                              |
| 80 | (arthrotec or diclofenac or dyloject or flector or pennsaid or solaraze or voltaren or zipsor or zorvolex).mp.                                                                                                                                                                                                                                                                                                                                                                                                                                                                                                                                                                                                                                                                                                                                                                                                                                                                                                                                                                                                                                                                                                                                                                                                                                 |
| 81 | (ateven or avantyl or aventyl or demethylamitriptyline or demethylamitriptyline or desitriptilina or desmethylamitriptyline or lumbeck or noramitriptyline or noritren or nortroptilina or nortriptylin* or nortryptilin* or nortriptylin* or norventyl or pamelor or sensaval).mp.                                                                                                                                                                                                                                                                                                                                                                                                                                                                                                                                                                                                                                                                                                                                                                                                                                                                                                                                                                                                                                                            |
| 82 | (avetil or axacet or axial or axum or delaxin or etroflex or forbaxin or lumirelax or methocal or methocarbamol* or methoxacet or methoxisal or metocarbamol* or metofenia or miolaxene or miorilas or miowas or myolaxene or neuraxin or parabaxin or perilax or reflexyn or relaxophen or relestrif or robax or robaxacet or robaximol or robaxin or robaxisal or robinax or romethocarb or spasmhalt or surquetil or tresortil).mp.                                                                                                                                                                                                                                                                                                                                                                                                                                                                                                                                                                                                                                                                                                                                                                                                                                                                                                         |
| 83 | (baclofen* or gablofen* or kemstro or lioresal).mp.                                                                                                                                                                                                                                                                                                                                                                                                                                                                                                                                                                                                                                                                                                                                                                                                                                                                                                                                                                                                                                                                                                                                                                                                                                                                                            |
| 84 | (bupivacaine or exparel or marcaine or sensorcaine or vivacaine).mp.                                                                                                                                                                                                                                                                                                                                                                                                                                                                                                                                                                                                                                                                                                                                                                                                                                                                                                                                                                                                                                                                                                                                                                                                                                                                           |
| 85 | (carbocaine or mepivacaine or polocaine or scandonest).mp.                                                                                                                                                                                                                                                                                                                                                                                                                                                                                                                                                                                                                                                                                                                                                                                                                                                                                                                                                                                                                                                                                                                                                                                                                                                                                     |

|     |                                                                                                                                                                              |
|-----|------------------------------------------------------------------------------------------------------------------------------------------------------------------------------|
| 86  | (catapres or clonidine or clorpres or duraclon or kapvay).mp.                                                                                                                |
| 87  | (celebrex or celecox*).mp.                                                                                                                                                   |
| 88  | (chlorprocaine or procaine).mp.                                                                                                                                              |
| 89  | (corticoid* or corticosteroid* or cortico-steroid*).tw,kf.                                                                                                                   |
| 90  | (coxflam or coxicam or maxicam or melfax or melonex or meloxicam* or meloxivet or metacam or mobec or mobic or mobicox or movalis or movatec or revmoksikam or vivlodex).mp. |
| 91  | (daypro or deflam or oxaprozin*).mp.                                                                                                                                         |
| 92  | (demethylimipramine or desimipramine or desipramin* or desmethylimipramine or dezipramine or dimethylimipramine or norimipramine or norpramin or pertofrane).mp.             |
| 93  | (desvenlafaxine or effexor or elafax or khedezla or pristiq or venlafaxin*).mp.                                                                                              |
| 94  | (dexmedetomidine or precedex).mp.                                                                                                                                            |
| 95  | diflunisal.mp.                                                                                                                                                               |
| 96  | (epitomax or qsymia or qudexy or tipiramat* or topamax or topax or topiragen or topiramat* or trokendi).mp.                                                                  |
| 97  | (feldene or piroxicam).mp.                                                                                                                                                   |
| 98  | (fenoprofen or nalfon).mp.                                                                                                                                                   |
| 99  | flurbiprofen.mp.                                                                                                                                                             |
| 100 | (frotek or ketoprofen).mp.                                                                                                                                                   |
| 101 | (gabapentin* or gralise or horizant or neurontin).mp.                                                                                                                        |
| 102 | (gabapril or gabitril or tiagabine).mp.                                                                                                                                      |
| 103 | (indocin or indomethacin or novo-methacin or pro-indo or tivorbex).mp.                                                                                                       |
| 104 | (ketalar or ketamine).mp.                                                                                                                                                    |
| 105 | (lidocaine or xylocaine or xylocard).mp.                                                                                                                                     |
| 106 | (local-infiltration adj2 analgesia).tw,kf.                                                                                                                                   |
| 107 | (lumiracoxib or prexige).mp.                                                                                                                                                 |
| 108 | (lyrica or pregabalin).mp.                                                                                                                                                   |
| 109 | (mefenamic-acid or ponstan or ponstel).mp.                                                                                                                                   |
| 110 | (metassalone or metaxalon* or skelaxin or zorane).mp.                                                                                                                        |
| 111 | (narcotic*-free or narcotic*-less or narcotic*-spar* or non-narcotic* or non-opioid*).tw,kf.                                                                                 |
| 112 | (narop or naropin or noropine or ropivacain*).mp.                                                                                                                            |
| 113 | (nonsteroidal-antiinflammatory or nonsteroidal-anti-inflammatory or non-steroidal-antiinflammatory or non-steroidal-anti-inflammatory or nsaid*).tw,kf.                      |
| 114 | (opiat*-free or opiat*-less or opiat*-spar* or opioid*-free or opioid*-less or opioid*-spar*).tw,kf.                                                                         |
| 115 | (oxcarbazepin* or oxtellar or timox or trileptal).mp.                                                                                                                        |
| 116 | parecoxib.mp.                                                                                                                                                                |
| 117 | (prialt or ziconotide).mp.                                                                                                                                                   |
| 118 | (sirdalud or ternelin or tizanidin* or zanaflex).mp.                                                                                                                         |
| 119 | or/10-118                                                                                                                                                                    |
| 120 | 9 and 119                                                                                                                                                                    |
| 121 | Alfentanil/                                                                                                                                                                  |
| 122 | exp Analgesics, Opioid/                                                                                                                                                      |
| 123 | Buprenorphine/                                                                                                                                                               |
| 124 | Butorphanol/                                                                                                                                                                 |
| 125 | Codeine/                                                                                                                                                                     |
| 126 | Dextropropoxyphene/                                                                                                                                                          |
| 127 | Fentanyl/                                                                                                                                                                    |

|     |                                                                                                                                                                                                                                                                                                                                                                                                                                                                                                                                                                                                                                                                                                                                                                                                                                                                                                                                                                                                                                                                                                                                                  |
|-----|--------------------------------------------------------------------------------------------------------------------------------------------------------------------------------------------------------------------------------------------------------------------------------------------------------------------------------------------------------------------------------------------------------------------------------------------------------------------------------------------------------------------------------------------------------------------------------------------------------------------------------------------------------------------------------------------------------------------------------------------------------------------------------------------------------------------------------------------------------------------------------------------------------------------------------------------------------------------------------------------------------------------------------------------------------------------------------------------------------------------------------------------------|
| 128 | Hydrocodone/                                                                                                                                                                                                                                                                                                                                                                                                                                                                                                                                                                                                                                                                                                                                                                                                                                                                                                                                                                                                                                                                                                                                     |
| 129 | Hydromorphone/                                                                                                                                                                                                                                                                                                                                                                                                                                                                                                                                                                                                                                                                                                                                                                                                                                                                                                                                                                                                                                                                                                                                   |
| 130 | Meperidine/                                                                                                                                                                                                                                                                                                                                                                                                                                                                                                                                                                                                                                                                                                                                                                                                                                                                                                                                                                                                                                                                                                                                      |
| 131 | Methadone/                                                                                                                                                                                                                                                                                                                                                                                                                                                                                                                                                                                                                                                                                                                                                                                                                                                                                                                                                                                                                                                                                                                                       |
| 132 | Morphine/                                                                                                                                                                                                                                                                                                                                                                                                                                                                                                                                                                                                                                                                                                                                                                                                                                                                                                                                                                                                                                                                                                                                        |
| 133 | Morphine Derivatives/                                                                                                                                                                                                                                                                                                                                                                                                                                                                                                                                                                                                                                                                                                                                                                                                                                                                                                                                                                                                                                                                                                                            |
| 134 | Nalbuphine/                                                                                                                                                                                                                                                                                                                                                                                                                                                                                                                                                                                                                                                                                                                                                                                                                                                                                                                                                                                                                                                                                                                                      |
| 135 | Oxycodone/                                                                                                                                                                                                                                                                                                                                                                                                                                                                                                                                                                                                                                                                                                                                                                                                                                                                                                                                                                                                                                                                                                                                       |
| 136 | Pentazocine/                                                                                                                                                                                                                                                                                                                                                                                                                                                                                                                                                                                                                                                                                                                                                                                                                                                                                                                                                                                                                                                                                                                                     |
| 137 | Pirinitramide/                                                                                                                                                                                                                                                                                                                                                                                                                                                                                                                                                                                                                                                                                                                                                                                                                                                                                                                                                                                                                                                                                                                                   |
| 138 | Remifentanil/                                                                                                                                                                                                                                                                                                                                                                                                                                                                                                                                                                                                                                                                                                                                                                                                                                                                                                                                                                                                                                                                                                                                    |
| 139 | Sufentanil/                                                                                                                                                                                                                                                                                                                                                                                                                                                                                                                                                                                                                                                                                                                                                                                                                                                                                                                                                                                                                                                                                                                                      |
| 140 | Tramadol/                                                                                                                                                                                                                                                                                                                                                                                                                                                                                                                                                                                                                                                                                                                                                                                                                                                                                                                                                                                                                                                                                                                                        |
| 141 | (Abalgin or Adalgin or Algafan or Algaphan or Algodin or Antalvic or Daloxen or Darvocet or Darvon or Deprancol or Deprandol or Depromic or Depronol or Destropropossifene or Develin or Dextropropoxyfeno or Dextropropoxyphen* or Dextroproxifeno or Dimeprotane-hydrochloride or Dolan or Dolene or Dolorphe or Doloxene or Doloxyne or Femadol or Kesso-gesic or Levitan or Leviton or Liberan or Piril or Pro-gesic or Prophene-65 or Propoxyphen* or Propoxyphine or Proxagesic or Proxyvon or Regredol or Tawasan).mp.                                                                                                                                                                                                                                                                                                                                                                                                                                                                                                                                                                                                                    |
| 142 | (Abstral or Actiq or Duragesic or Durogesic or Durotep or Epufen or Fentalis or Fentamyl or Fentane* or Fentanil* or Fentanyl* or Fentora or Innovar or Instanyl or Ionsys or Lazanda or Leptanal or Matrifen or Mezolar or Onsolis or PecFent or Phentanyl or Rapinyl or Recuvyra or Sentonil or Sublimase or Sublimaze or Subsys or Tanyl or Transfenta).mp.                                                                                                                                                                                                                                                                                                                                                                                                                                                                                                                                                                                                                                                                                                                                                                                   |
| 143 | (Acetazone or Ambenyl or Ardinex or Atasol or Bromanyl or Calmylin or Codein* or Codeprex or Codicaps or Codipertussin or Codrix or Codyl or Cotridin or Isocodeine or Mersyndol or Methylnorfine or Methylnorphine or Procet or Robaxacet or Robaxisal or Synalgos or Trezix or Trianal or Triatec).mp.                                                                                                                                                                                                                                                                                                                                                                                                                                                                                                                                                                                                                                                                                                                                                                                                                                         |
| 144 | (Actiskenan or Algedol or Anafil or Arymo or Astramorph or Avinza or Contalgin or Depodur or Depomorphine or Dolcontin or Doloral or Duralmor or Duramorph or Embeda or Ethirfin or Graten or Infumorph or Kadian or Kapanol or Longphine or M-Ediat or Meslon or M-Eslon or Mitigo or Moraxen or Morcontin or Morficontin or Morphabond or Morphanton or Morphgesic or Morphia or Morphine* or Moscontin or MS-Contin or M-S-Contin or Noceptin or Oblioser or Oramorph or Rapi-ject or Relimal or Roxanol or Rylomine or Sevredol or Skenan or S-morphine or Statex or Vendal or Zomorph).mp.                                                                                                                                                                                                                                                                                                                                                                                                                                                                                                                                                  |
| 145 | (Adamon or Adolonta or Amadol or Analab or Analdol or Andalpha or Bellatram or Biodalgic or Biokanol or Biomadol or Calmol or Contramid or Contramal or Con-zip or Conzip or Dolana or Dolika or Dolmal or Dolotral or Dolzam or Dromadol or Durela or Eufindol or Exopen or Jutadol or Katrasic or Kontram or Labesfal or Mabron or Melanate or Mosepan or Newdorphin or Nobligan or Nonalges or Omnidol or Pengesic or Prontofort or Radol or Ralivia or Ranitidin or Rofy or Rybix or Ryzolt or Sefmal or Sensitram or Takadol or Tamolan or Tandol or Tarol or Theradol or Tiparol or Tiral or Topalgic or Trabar or Trabilan or Trabilin or Tradol* or Tradona or Tralgiol or Tralic or Tramabeta or Tramacet or Tramada or Tramadox or Trama-dorsch or Tramadi* or Tramado* or Tramadura or Tramagetic or Tramagit or Tramahexal or Tramake or Tramal or Tramaliv or Tramazac or Tramed or Tramex or Tramol or Tramundin or Trapidol or Trasedal or Trasik or Trexol or Tridol or Tridural or Trodon or Trondon or Ultracet or Ultram or Unital or Urgendol or Zamadol or Zamudol or Zodol or Zumalgic or Zumatran or Zydol or Zytram).mp. |
| 146 | (Adanon or Algidon or Algolysin or Algovetin or Algoxale or Althose or Amidon* or Amidosan or Anadon or Biodone or Butalgin or Cophylac or Deamin or Depridol or Diaminon or Dianone or Dolafin or Dolamid or Dolesone or Dolmed or Dolophin* or Dorex or Dorexol or Eptadone or Fenadon or Gobbidona or Heptadon* or Heptanon or Ketalgin or Mecodin or Mepecton or                                                                                                                                                                                                                                                                                                                                                                                                                                                                                                                                                                                                                                                                                                                                                                             |

|     |                                                                                                                                                                                                                                                                                                                                                                                                                                                                                                                                                                                                                                                                                                                                                                                                                                                                                                                                                                                                                                                                                                                                                                                                                 |
|-----|-----------------------------------------------------------------------------------------------------------------------------------------------------------------------------------------------------------------------------------------------------------------------------------------------------------------------------------------------------------------------------------------------------------------------------------------------------------------------------------------------------------------------------------------------------------------------------------------------------------------------------------------------------------------------------------------------------------------------------------------------------------------------------------------------------------------------------------------------------------------------------------------------------------------------------------------------------------------------------------------------------------------------------------------------------------------------------------------------------------------------------------------------------------------------------------------------------------------|
|     | Mephenon or Metadol or Metadon* or Metasedin or Methaddict or Methadon* or Methadose or Methaforte mix or Miadone or Moheptan or Pallidone or Phenadon* or Physepton* or Polamidon or Polamivet or Polamivit or Sedo-Rapide or Sinalgin or Symoron or Westadone).mp.                                                                                                                                                                                                                                                                                                                                                                                                                                                                                                                                                                                                                                                                                                                                                                                                                                                                                                                                            |
| 147 | (Allay or Anexsia or Apadaz or Azdone or Bancap or Bekadid or Codamine or Codinovo or COGESIC or Dico or Dicodid or Dihydrocodeinone or Dihydrocodone or Duradyne-DHC or Flowtuss or Hidrocodona or Hycodan or Hycofenix or Hycon or Hydrocodeinonebitartrate or Hydrocodon* or Hydrocon* or Hydropane or Hy-Phen or Hysingla or Idrocodone or Lorcet-HD or Lortab or Multacodin or Norcet or Norco or Obredon or Reprexain or Rezira or Robidone or Tussicaps or Tussignon or Tussionex or Tycolet or Vantrela-ER or Vicodin or Vicoprin or Vicoprofen or Vituz or Xtrelus or Zohydro or Zutripro or Zydone).mp.                                                                                                                                                                                                                                                                                                                                                                                                                                                                                                                                                                                               |
| 148 | (Alfenil or Alfenta or Alfentanil* or Alfentanyl or Brevafen or Fanaxal or Limifen or Rapifen).mp.                                                                                                                                                                                                                                                                                                                                                                                                                                                                                                                                                                                                                                                                                                                                                                                                                                                                                                                                                                                                                                                                                                              |
| 149 | (Algil or Alodan or Atropine or Centralgin* or Cluyer or Demero* or Dispadol or Dolanquifa or Dolantal or Dolantin* or Dolargan or Dolcontral or Dolestin* or Dolin or Dolocontral or Doloneurin or Doloneutrotat or Dolosal or Dolosan or Dolsin or Dolvanol or Endolate or Isonipeccain* or Lidol or Lydol or Mefedina or Mepadin or Meperdol or Mepergan or Meperiden or Meperidin* or Meperidol or Mephedine or Mepiridine or Mialgin or Nemerol or Neomochin or Operidine or Opistan or Pantalgin or Petadin or Petantin* or Pethanol or Pethedine or Pethidin* or Petidin* or Petydyna or Phetidine or Pipersal or Piridosal or Sauteralgyl or Supposal or Synlaudine).mp.                                                                                                                                                                                                                                                                                                                                                                                                                                                                                                                                |
| 150 | (Anorfin or Belbuca or Bunavail or Buprenex or Buprenorfin* or Buprenorphin* or Buprex or Buprine or Butrans or Cassipa or Finibron or Norphin or Pentorel or Prefin or Probuphenine or Probuphine or Somnena or Sublocade or Suboxone or Subutex or Temgesic or Transtec or Vetergesic or Zubsolv).mp.                                                                                                                                                                                                                                                                                                                                                                                                                                                                                                                                                                                                                                                                                                                                                                                                                                                                                                         |
| 151 | (Avridi or Bionine or Bionone or Bolodorm or Broncodal or Bucodal or Cafacodal or Cardanon or Codeinone or Codenon or Codix-5 or Codoxy or Combunox or Dihydrohydroxycodone or Dihydrohydroxydodeinone or Dihydrone or Dihydroxycodone or Dinarkon or Diphydrone or Endine or Endone or Eubine or Eucodal* or Eudin or Eukdin or Eukodal or Eumorphal or Eurodamine or Eutagen or Hydrocodal or Hydroxycodone* or Ludonal or Medicodal or M-oxy or Narcobasin* or Narcosin or Nargenol or Narodal or Nucodan or Opton or Ossicodone or Oxanest or Oxaydo or Oxecta or Oxiconone or Oxicon or Oxicone or Oxicontin or Oxiconum or Oxikon or Oxy-ir or Oxycet or Oxycocet or Oxycod or Oxycodan or Oxycodone* or Oxycodon* or Oxycodyl or Oxycone or Oxycontin or Oxydose or Oxyfast or Oxygesic or OxyIR or Oxykon or OxyNEO or Oxynorm or Pancodine or Pancodone or Pavinal or Percobarb or Percocet or Percodan or Percolone or Pronarcin or Remoxy or Roxicet or Roxicodone or Roxilox or Roxiprin or Roxybond or Roxycodone or Synthiodal or Stupenal or Suspendol or Supeudol or Targin or Targiniq or Tebodal or Tekodin or Thecodin or Thecodin or Troxyca or Tylox or Xartemis or Xtampa or Xtampza).mp. |
| 152 | (Beforal or Butorfanol or Butorphanol or Butorphanolum or Dolorex or Moradol or Stadol).mp.                                                                                                                                                                                                                                                                                                                                                                                                                                                                                                                                                                                                                                                                                                                                                                                                                                                                                                                                                                                                                                                                                                                     |
| 153 | (Biomorphyl or Cofalaudid or Dihydromorfin or Dihydromorfinone or Dihydromorphone or Dilaudid or DiMo or Dimorphone or Dolonovag or Exalgo or Hidromorfona or Hydal or Hydromorfona or Hydromorph-Contin or Hydromorfinone-hydrochloride or Hydromorphon* or Hydrostat-ir or Hymorphan or Idromorfone or Jurnista or Laudacon* or Novolaudon or Opidol or Paliadon or Palladon* or Rexaphon or Semcox or Sophidone).mp.                                                                                                                                                                                                                                                                                                                                                                                                                                                                                                                                                                                                                                                                                                                                                                                         |
| 154 | (Chronogesic or DSUVIA or Fentathianyl or Fentathienyl or Fentatiennil or Sufenta or Sufentanil* or Sufentanyl).mp.                                                                                                                                                                                                                                                                                                                                                                                                                                                                                                                                                                                                                                                                                                                                                                                                                                                                                                                                                                                                                                                                                             |
| 155 | (Dipidolor or Dipiritramide or Dipydolor or Piridolan or Pirinitramide or Piritramid* or Pyritramide).mp.                                                                                                                                                                                                                                                                                                                                                                                                                                                                                                                                                                                                                                                                                                                                                                                                                                                                                                                                                                                                                                                                                                       |
| 156 | (Dolapent or Fortal or Fortalgescic or Fortalin or Fortral or Fortraline or Fortwin or Lexir or Liticon or Peltazon or Pentacozine or Pentafen or Pentagin or Pentalgina or Pentazocin* or Pentozocine or Perutagin or Sosegon or Sosigon or TALACEN or Talioin or Talwin).mp.                                                                                                                                                                                                                                                                                                                                                                                                                                                                                                                                                                                                                                                                                                                                                                                                                                                                                                                                  |
| 157 | (Nalbuphin* or Nalbuphin* or Nalcryn or Nalpain or Nubain* or Onfor).mp.                                                                                                                                                                                                                                                                                                                                                                                                                                                                                                                                                                                                                                                                                                                                                                                                                                                                                                                                                                                                                                                                                                                                        |
| 158 | (Nicomorfin* or Nicomorphin* or Vilan).mp.                                                                                                                                                                                                                                                                                                                                                                                                                                                                                                                                                                                                                                                                                                                                                                                                                                                                                                                                                                                                                                                                                                                                                                      |

|     |                                                                                                                                                                                                                                                                                                        |
|-----|--------------------------------------------------------------------------------------------------------------------------------------------------------------------------------------------------------------------------------------------------------------------------------------------------------|
| 159 | (Remifentanil or Remifentanyl or Ultiva).mp.                                                                                                                                                                                                                                                           |
| 160 | or/121-159                                                                                                                                                                                                                                                                                             |
| 161 | 120 and 160                                                                                                                                                                                                                                                                                            |
| 162 | Animals/ not (Animals/ and Humans/)                                                                                                                                                                                                                                                                    |
| 163 | Disease models, animal/ or Models, animal/                                                                                                                                                                                                                                                             |
| 164 | ((animal or animals or canine* or cat or cats or dog or dogs or feline or hamster* or lamb or lambs or mice or monkey or monkeys or mouse or murine or pig or pigs or piglet* or porcine or primate* or rabbit* or rats or rat or rodent* or sheep* or veterinar*) not (human* or patient*)).ti,kf,jw. |
| 165 | or/162-164                                                                                                                                                                                                                                                                                             |
| 166 | 161 not 165                                                                                                                                                                                                                                                                                            |
| 167 | (exp child/ or exp infant/) not (adolescent/ or exp adult/)                                                                                                                                                                                                                                            |
| 168 | (baby or babies or boy* or child* or fetus or fetal or foet* or girl* or juvenile* or kid or kids or infan* or newborn* or new-born* or neonat* or neo-nat* or paediatr* or pediater* or preadolesc* or prepubesc* or preteen* or pubescen* or toddler* or youth*).ti,jw.                              |
| 169 | 167 or 168                                                                                                                                                                                                                                                                                             |
| 170 | 166 not 169                                                                                                                                                                                                                                                                                            |
| 171 | Clinical trials as topic/                                                                                                                                                                                                                                                                              |
| 172 | Controlled clinical trial/                                                                                                                                                                                                                                                                             |
| 173 | Randomized controlled trial/                                                                                                                                                                                                                                                                           |
| 174 | (placebo or randomized or randomly).tw.                                                                                                                                                                                                                                                                |
| 175 | trial.ti.                                                                                                                                                                                                                                                                                              |
| 176 | 171 or 172 or 173 or 174 or 175                                                                                                                                                                                                                                                                        |
| 177 | 170 and 176                                                                                                                                                                                                                                                                                            |

Following peer review, age filter was revised to retrieve articles from pediatric journals and studies including pediatric patients.

The queries at lines 167 and 168 of the original strategy were modified as follows:

**167** (exp child/ or exp infant/) not (adolescent/ or exp adult/)

**168** (baby or babies or boy\* or fetus or fetal or foet\* or girl\* or kid or kids or infan\* or newborn\* or new-born\* or neonat\* or neo-nat\* or preadolesc\* or prepubesc\* or preteen\* or pubescen\* or toddler\*).ti,jw.



## Supplement 2. Abstract screening decision tables

### I. Any Study

| Characteristics                                                                                                                                                               | Decision       |
|-------------------------------------------------------------------------------------------------------------------------------------------------------------------------------|----------------|
| Studies where the experimental design was <b>clearly</b> not a parallel randomized controlled trial (e.g. retrospective studies, historically controlled studies)             | <b>Exclude</b> |
| Narrative review (commentaries, letters and editorials), systematic reviews, meta analyses                                                                                    | <b>Exclude</b> |
| Did not assess interventions for postoperative pain management                                                                                                                | <b>Exclude</b> |
| Were conducted in animals                                                                                                                                                     | <b>Exclude</b> |
| Involved only pediatric patients                                                                                                                                              | <b>Exclude</b> |
| Analgesia regimens compared were <u>exclusively pre-operative</u> (e.g. preemptive gabapentin), with no indication that post-discharge analgesia was different between groups | <b>Exclude</b> |
| Analgesia regimens compared were <u>exclusively intra-operative</u> (e.g. nerve blocks), with no indication that post-discharge analgesia was different between groups        | <b>Exclude</b> |
| Analgesia regimen was offered <u>exclusively during hospital stay</u> (e.g. PCA, epidural), with no indication that post-discharge analgesia was different between groups     | <b>Exclude</b> |
| Involved analgesia treatment <u>exclusively for chronic postoperative pain</u> (i.e. the intervention started over 2 two months after surgery)                                | <b>Exclude</b> |

### II. Randomized trials involving post-discharge analgesia

| Primary analgesia regimen |                          |                                                                    | Rescue analgesia requiring a new prescription | Decision                |
|---------------------------|--------------------------|--------------------------------------------------------------------|-----------------------------------------------|-------------------------|
| Analgesia intervention 1  | Analgesia intervention 2 | Rescue analgesia readily available for patients (PRN prescription) |                                               |                         |
| Non-opioid (or placebo)   | Opioid                   | Non-opioid                                                         | Opioid OR Non-opioid OR Not used OR Unclear   | <b>Verify full-text</b> |
| Non-opioid (or placebo)   | Opioid                   | Not used                                                           | Opioid OR Non-opioid OR Not used OR Unclear   | <b>Verify full-text</b> |
| Non-opioid (or placebo)   | Opioid                   | Unclear                                                            | Opioid OR Non-opioid OR Not used OR Unclear   | <b>Verify full-text</b> |
| Non-opioid (or placebo)   | Opioid                   | Opioid                                                             | Opioid OR Non-opioid OR Not used OR Unclear   | <b>Exclude</b>          |
| Non-opioid                | Non-opioid (or placebo)  | Opioid OR Non-opioid OR Not used OR Unclear                        | Opioid OR Non-opioid OR Not used OR Unclear   | <b>Exclude</b>          |
| Opioid                    | Opioid                   | Opioid OR Non-opioid OR Not used OR Unclear                        | Opioid OR Non-opioid OR Not used OR Unclear   | <b>Exclude</b>          |

**Supplement 3. Data extraction form**

|                                                                                                                                                                                                                                                                                                                                                                                                      |
|------------------------------------------------------------------------------------------------------------------------------------------------------------------------------------------------------------------------------------------------------------------------------------------------------------------------------------------------------------------------------------------------------|
| <b>A. STUDY IDENTIFICATION</b>                                                                                                                                                                                                                                                                                                                                                                       |
| <b>STUDY DETAILS</b>                                                                                                                                                                                                                                                                                                                                                                                 |
| <ol style="list-style-type: none"> <li>1. Sponsorship source:</li> <li>2. Country:</li> <li>3. Setting:</li> <li>4. Comments:</li> </ol>                                                                                                                                                                                                                                                             |
| <b>AUTHORS</b>                                                                                                                                                                                                                                                                                                                                                                                       |
| <ol style="list-style-type: none"> <li>1. Author's name:</li> <li>2. Institution:</li> <li>3. Email:</li> <li>4. Address:</li> </ol>                                                                                                                                                                                                                                                                 |
| <b>ADDITIONAL INFORMATION</b>                                                                                                                                                                                                                                                                                                                                                                        |
| <ol style="list-style-type: none"> <li>1. Article title:</li> <li>2. Journal, year, volume, number and page:</li> <li>3. Key findings:</li> <li>4. Publication source of study (peer reviewed or grey literature):</li> <li>5. Setting (university hospital, public hospital, private hospital database):</li> <li>6. Study aim(s)/research question(s):</li> <li>7. Year of publication:</li> </ol> |

|                                                                                                                                                                                                                                                                                                                     |
|---------------------------------------------------------------------------------------------------------------------------------------------------------------------------------------------------------------------------------------------------------------------------------------------------------------------|
| <b>B. METHODS</b>                                                                                                                                                                                                                                                                                                   |
| <ol style="list-style-type: none"> <li>1. Study design:</li> <li>2. Describe methodology briefly:</li> <li>3. Primary outcome:</li> <li>4. Secondary outcomes:</li> </ol>                                                                                                                                           |
| <b>C. POPULATION</b>                                                                                                                                                                                                                                                                                                |
| <b>INCLUSION/ EXCLUSION CRITERIA</b>                                                                                                                                                                                                                                                                                |
| <ol style="list-style-type: none"> <li>1. Inclusion criteria:</li> <li>2. Exclusion criteria:</li> <li>3. Group differences:</li> </ol>                                                                                                                                                                             |
| <b>ADDITIONAL POPULATION DATA</b>                                                                                                                                                                                                                                                                                   |
| <ol style="list-style-type: none"> <li>1. Describe the sample size calculation</li> <li>2. Were patients removed from the trial when they reported no improvement, no adherence to treatment and/or adverse events? (Yes/No)</li> <li>3. Was the study conducted in a single center or multiple centers?</li> </ol> |
| <b>PATIENT CHARACTERISTICS</b>                                                                                                                                                                                                                                                                                      |
| <ol style="list-style-type: none"> <li>1. Group label (e.g. opioid-free/based):</li> <li>2. Sample size:</li> <li>3. Number of patients randomized</li> <li>4. Number of patients analyzed</li> <li>5. Sex/gender (%F/%M):</li> </ol>                                                                               |

|                                                                                                                                                                                                                                                                                                                                                                                                                                                                                                                                                                                                                                                   |
|---------------------------------------------------------------------------------------------------------------------------------------------------------------------------------------------------------------------------------------------------------------------------------------------------------------------------------------------------------------------------------------------------------------------------------------------------------------------------------------------------------------------------------------------------------------------------------------------------------------------------------------------------|
| <p><b>6. Mean (or median) age:</b></p> <p><b>7. ASA class:</b></p> <p><b>8. Comorbidities and risk factors:</b></p> <p><b>9. Preoperative diagnosis, including percentages (if available):</b></p> <p><b>10. Surgery, including percentages (e.g. knee replacement, hysterectomy, colectomy):</b></p> <p><b>11. Surgical approach, including percentages (e.g. open, laparoscopic, arthroscopic):</b></p> <p><b>12. Hospital length of stay (if means or medians not reported, please specify the target length of stay or indicate 'day surgery'):</b></p> <p><b>13. Other characteristics of enrolled subjects (relevant to the study):</b></p> |
| <b>D. INTERVENTIONS</b>                                                                                                                                                                                                                                                                                                                                                                                                                                                                                                                                                                                                                           |
| <p><b>1. Group label (e.g. opioid-free/based):</b></p> <p><b>2. Analgesia intervention before surgery (pre-emptive analgesia intervention initiated in the preoperative period), if any:</b></p> <p><b>3. Analgesia and anesthesia interventions in the operating room (e.g. systemic drugs, peripheral nerve blocks, epidural, spinal analgesia and/or local infiltrations):</b></p> <p><b>4. Analgesia intervention after surgery (in hospital):</b></p> <p><b>5. Analgesia intervention after surgery (after hospital discharge):</b></p> <p><b>6. Other relevant characteristics of the intervention(s), or comments:</b></p>                 |
| <b>E. OUTCOMES</b>                                                                                                                                                                                                                                                                                                                                                                                                                                                                                                                                                                                                                                |
| <p><b>1. Outcome name</b></p> <p><b>2. Outcome type (e.g. continuous, dichotomous)</b></p>                                                                                                                                                                                                                                                                                                                                                                                                                                                                                                                                                        |

- 3. Reported as [e.g. mean ( $\pm$  SD), percentage, etc.]**
- 4. Outcome group (i.e. primary, secondary)**
- 5. Outcome reported (e.g. fully reported, not reported)**
- 6. Scale**
- 7. Range**
- 8. Unit of measurement**
- 9. Direction (e.g. lower is better, higher is better)**
- 10. Notes**
